# Supplementary material for: Mainstreams of Horizontal Gene Exchange in Enterobacteria: Consideration of the Outbreak of Enterohemorrhagic E. coli O104:H4 in Germany in 2011
Source: PubMed Central journal article supplement (PMC3195076; doi:10.1371/journal.pone.0025702), 2011-10-14
Supplement: pone.0025702.s001.pdf [file pone.0025702.s001.pdf]

Tabel S1. Detection of known pathogenicity genomic islands from PAI DB by different programs

| Genomes                                                                                              | #  | PAI Name      | Start   | Stop    | IslandPick | SIGI-HMM | IslandPath | SW Sniffer |
|------------------------------------------------------------------------------------------------------|----|---------------|---------|---------|------------|----------|------------|------------|
| NC_004668, <i>Enterococcus faecalis</i> V583                                                         | 1  | Not named     | 445282  | 582786  | 0          | 1        | 1          | 1          |
| NC_004431, <i>Escherichia coli</i> CFT073                                                            | 1  | PAI I CFT073  | 3406225 | 3450866 | 0          | 1        | 1          | 1          |
|                                                                                                      | 2  | PAI II CFT073 | 4913367 | 4971660 | 0          | 0        | 1          | 1          |
| NC_002655, <i>Escherichia coli</i> O157:H7 EDL933                                                    | 1  | LEE           | 4649752 | 4692545 | 0          | 1        | 1          | 1          |
| NC_002695, <i>Escherichia coli</i> O157:H7 Sakai                                                     | 1  | LEE           | 4580769 | 4623562 | 0          | 1        | 1          | 1          |
| NC_006570, <i>Francisella tularensis</i> subsp. <i>tularensis</i> Schu 4                             | 1  | FPI           | 1374701 | 1408279 | 0          | 0        | 0          | 1          |
|                                                                                                      | 2  | FPI           | 1768045 | 1801623 | 0          | 0        | 0          | 1          |
| NC_004917, <i>Helicobacter hepaticus</i> ATCC 51449                                                  | 1  | HHGI1         | 223218  | 294244  | 0          | 0        | 0          | 1          |
| NC_000915, <i>Helicobacter pylori</i> 26695                                                          | 1  | cag PAI       | 547328  | 585350  | 0          | 0        | 0          | 1          |
| NC_000921, <i>Helicobacter pylori</i> J99                                                            | 1  | cag PAI       | 510500  | 548694  | 0          | 0        | 0          | 1          |
| NC_003112, <i>Neisseria meningitidis</i> MC58                                                        | 1  | IHT-A         | 75694   | 109777  | 0          | 0        | 0          | 1          |
|                                                                                                      | 2  | IHT-C         | 1827738 | 1860290 | 0          | 1        | 1          | 1          |
| NC_004578, <i>Pseudomonas syringae</i> pv. <i>tomato</i> DC3000                                      | 1  | Hrp PAI       | 1502395 | 1551861 | 0          | 0        | 0          | 0          |
| NC_006905, <i>Salmonella enterica</i> subsp. <i>enterica</i> serovar <i>Choleraesuis</i> str. SC-B67 | 1  | SPI-5         | 1155936 | 1161624 | 0          | 0        | 0          | 0          |
|                                                                                                      | 2  | SPI-11        | 1350481 | 1366166 | 0          | 1        | 0          | 1          |
|                                                                                                      | 3  | SPI-2         | 1497670 | 1539498 | 0          | 1        | 0          | 1          |
|                                                                                                      | 4  | SPI-12        | 2354604 | 2365678 | 0          | 1        | 0          | 1          |
|                                                                                                      | 5  | SPI-1         | 2960260 | 3003747 | 0          | 1        | 0          | 1          |
|                                                                                                      | 6  | SPI-3         | 3890879 | 3903697 | 0          | 0        | 1          | 0          |
|                                                                                                      | 7  | SPI-4         | 4411902 | 4438599 | 0          | 1        | 0          | 1          |
| NC_003198, <i>Salmonella enterica</i> subsp. <i>enterica</i> serovar <i>Typhi</i> CT18               | 1  | SPI-6         | 302092  | 360757  | 0          | 1        | 0          | 1          |
|                                                                                                      | 2  | SPI-5         | 1085068 | 1092563 | 0          | 0        | 0          | 1          |
|                                                                                                      | 3  | SPI-2         | 1624920 | 1666524 | 0          | 1        | 0          | 1          |
|                                                                                                      | 4  | SPI-9         | 2743495 | 2759190 | 0          | 0        | 0          | 0          |
|                                                                                                      | 5  | SPI-1         | 2858736 | 2900586 | 0          | 1        | 0          | 1          |
|                                                                                                      | 6  | SPI-8         | 3132530 | 3139414 | 0          | 1        | 0          | 1          |
|                                                                                                      | 7  | SPI-3         | 3883613 | 3900553 | 0          | 0        | 0          | 1          |
|                                                                                                      | 8  | SPI-4         | 4322993 | 4346383 | 0          | 1        | 0          | 1          |
|                                                                                                      | 9  | SPI-7         | 4409511 | 4543148 | 1          | 1        | 1          | 1          |
|                                                                                                      | 10 | SPI-10        | 4683605 | 4716538 | 1          | 1        | 0          | 1          |
| NC_004631, <i>Salmonella enterica</i> subsp. <i>enterica</i> serovar <i>Typhi</i> Ty2                | 1  | SPI-2         | 1314607 | 1356216 | 0          | 1        | 0          | 1          |
|                                                                                                      | 2  | SPI-1         | 2844593 | 2886443 | 0          | 1        | 0          | 1          |
|                                                                                                      | 3  | SPI-7         | 4394302 | 4526050 | 1          | 1        | 1          | 1          |
| NC_003197, <i>Salmonella typhimurium</i> LT2                                                         | 1  | SPI-5         | 1175321 | 1184389 | 0          | 0        | 0          | 1          |
|                                                                                                      | 2  | SPI-2         | 1461740 | 1501800 | 0          | 1        | 0          | 1          |
|                                                                                                      | 3  | SPI-1         | 3005842 | 3050120 | 0          | 1        | 0          | 1          |
|                                                                                                      | 4  | SPI-3         | 3948576 | 3965191 | 0          | 0        | 0          | 0          |
|                                                                                                      | 5  | SPI-4         | 4477849 | 4501259 | 0          | 1        | 0          | 1          |
| NC_002505, <i>Vibrio cholerae</i> O1 biovar <i>eltor</i> str. N16961                                 | 1  | VSP-I         | 175343  | 189380  | 0          | 1        | 1          | 1          |
|                                                                                                      | 2  | VSP-II        | 523156  | 530602  | 0          | 1        | 1          | 1          |
|                                                                                                      | 3  | VPI           | 873242  | 914124  | 0          | 1        | 1          | 1          |
|                                                                                                      | 4  | VPI-2         | 1895692 | 1952861 | 0          | 1        | 1          | 1          |
| NC_003919, <i>Xanthomonas axonopodis</i> pv. <i>citri</i> str. 306                                   | 1  | Hrp PAI       | 462225  | 488334  | 0          | 0        | 0          | 1          |
| NC_007086, <i>Xanthomonas campestris</i> pv. <i>campestris</i> str. 8004                             | 1  | Hrp PAI       | 3596348 | 3619441 | 0          | 1        | 0          | 1          |
| NC_003902, <i>Xanthomonas campestris</i> pv. <i>campestris</i> str. ATCC 33913                       | 1  | Hrp PAI       | 1424335 | 1447429 | 0          | 1        | 0          | 1          |
| NC_007508, <i>Xanthomonas campestris</i> pv. <i>vesicatoria</i> str. 85-10                           | 1  | Hrp PAI       | 459479  | 494176  | 0          | 1        | 0          | 1          |
| NC_006834, <i>Xanthomonas oryzae</i> pv. <i>oryzae</i> KACC10331                                     | 1  | Hrp PAI       | 58273   | 90451   | 0          | 0        | 1          | 0          |
| NC_003143, <i>Yersinia pestis</i> CO92                                                               | 1  | HPI           | 2134947 | 2171362 | 0          | 0        | 1          | 1          |
| NC_004088, <i>Yersinia pestis</i> KIM                                                                | 1  | HPI           | 2645436 | 2681339 | 0          | 0        | 1          | 1          |
| NC_005810, <i>Yersinia pestis</i> biovar <i>Medievalis</i> str. 91001                                | 1  | HPI           | 1799736 | 1828106 | 0          | 0        | 0          | 1          |
| NC_006155, <i>Yersinia pseudotuberculosis</i> IP32953                                                | 1  | HPI           | 1913940 | 1949837 | 0          | 0        | 0          | 1          |
| <b>Rate of false negatives</b>                                                                       |    |               |         |         | 94.12%     | 41.18%   | 68.63%     | 11.76%     |
