# Supplementary material for: Mainstreams of Horizontal Gene Exchange in Enterobacteria: Consideration of the Outbreak of Enterohemorrhagic E. coli O104:H4 in Germany in 2011
Source: PubMed Central journal article supplement (PMC3195076; doi:10.1371/journal.pone.0025702), 2011-10-14
Supplement: pone.0025702.s002.pdf [file pone.0025702.s002.pdf]

Table S2. Numbers of genomic islands identified by different programs

| #  | Genome                                                                    | In total   |          |            |            | Unconfirmed predictions* |          |            |            |
|----|---------------------------------------------------------------------------|------------|----------|------------|------------|--------------------------|----------|------------|------------|
|    |                                                                           | IslandPick | SIGI-HMM | IslandPath | SW Sniffer | IslandPick               | SIGI-HMM | IslandPath | SW Sniffer |
| 1  | Acidovorax avenae subsp. citrulli AAC00-1 [NC_008752]                     | 0          | 35       | 18         | 32         | 0                        | 10       | 5          | 9          |
| 2  | Acidovorax sp. JS42 [NC_008782]                                           | 25         | 34       | 11         | 27         | 7                        | 7        | 1          | 9          |
| 3  | Acinetobacter baumannii ATCC 17978 [NC_009085]                            | 4          | 4        | 4          | 8          | 1                        | 3        | 2          | 6          |
| 4  | Anaeromyxobacter dehalogenans 2CP-C [NC_007760]                           | 7          | 18       | 2          | 21         | 3                        | 4        | 0          | 11         |
| 5  | Arthrobacter sp. FB24 chr. 1 [NC_008541]                                  | 0          | 12       | 3          | 16         | 0                        | 2        | 1          | 8          |
| 6  | Azoarcus sp. EbN1 [NC_006513]                                             | 0          | 22       | 24         | 15         | 0                        | 2        | 11         | 4          |
| 7  | Bacillus anthracis str. 'Ames Ancestor' [NC_007530]                       | 3          | 0        | 5          | 38         | 0                        | 0        | 3          | 34         |
| 8  | Bacillus anthracis str. Ames [NC_003997]                                  | 3          | 0        | 5          | 35         | 0                        | 0        | 3          | 31         |
| 9  | Bacillus anthracis str. Sterne [NC_005945]                                | 3          | 0        | 5          | 41         | 0                        | 0        | 3          | 37         |
| 10 | Bacillus cereus ATCC 10987 [NC_003909]                                    | 3          | 4        | 10         | 30         | 1                        | 0        | 5          | 26         |
| 11 | Bacillus cereus ATCC 14579 [NC_004722]                                    | 5          | 2        | 9          | 32         | 0                        | 2        | 6          | 29         |
| 12 | Bacillus cereus E33L [NC_006274]                                          | 0          | 1        | 5          | 33         | 0                        | 0        | 4          | 33         |
| 13 | Bacillus licheniformis ATCC 14580 [NC_006322]                             | 0          | 3        | 8          | 27         | 0                        | 0        | 0          | 16         |
| 14 | Bacillus thuringiensis serovar konkukian str. 97-27 [NC_005957]           | 0          | 1        | 7          | 34         | 0                        | 1        | 7          | 34         |
| 15 | Bacillus thuringiensis str. Al Hakam [NC_008600]                          | 2          | 2        | 5          | 29         | 0                        | 1        | 2          | 27         |
| 16 | Bordetella bronchiseptica RB50 [NC_002927]                                | 0          | 25       | 6          | 16         | 0                        | 8        | 0          | 5          |
| 17 | Bordetella parapertussis 12822 [NC_002928]                                | 0          | 11       | 2          | 8          | 0                        | 4        | 1          | 4          |
| 18 | Bordetella pertussis Tohama I [NC_002929]                                 | 0          | 11       | 18         | 7          | 0                        | 4        | 12         | 3          |
| 19 | Borrelia afzelii Pk0 [NC_008277]                                          | 0          | 8        | 0          | 4          | 0                        | 8        | 0          | 4          |
| 20 | Borrelia burgdorferi B31 [NC_001318]                                      | 0          | 3        | 0          | 0          | 0                        | 3        | 0          | 0          |
| 21 | Borrelia garinii Pbi chr. linear [NC_006156]                              | 0          | 6        | 0          | 6          | 0                        | 6        | 0          | 6          |
| 22 | Borrelia turicatae 91E135 [NC_008710]                                     | 0          | 24       | 0          | 10         | 0                        | 21       | 0          | 8          |
| 23 | Bradyrhizobium japonicum USDA 110 [NC_004463]                             | 0          | 71       | 36         | 27         | 0                        | 12       | 8          | 1          |
| 24 | Burkholderia cenocepacia AU 1054 chr. 1 [NC_008060]                       | 10         | 10       | 10         | 13         | 7                        | 1        | 1          | 3          |
| 25 | Burkholderia cenocepacia AU 1054 chr. 2 [NC_008061]                       | 1          | 14       | 9          | 11         | 0                        | 1        | 1          | 1          |
| 26 | Burkholderia cenocepacia AU 1054 chr. 3 [NC_008062]                       | 0          | 1        | 3          | 3          | 0                        | 0        | 3          | 2          |
| 27 | Burkholderia cenocepacia HI2424 chr. 1 [NC_008542]                        | 2          | 12       | 9          | 10         | 0                        | 1        | 2          | 3          |
| 28 | Burkholderia cenocepacia HI2424 chr. 2 [NC_008543]                        | 1          | 16       | 8          | 13         | 1                        | 2        | 1          | 2          |
| 29 | Burkholderia cenocepacia HI2424 chr. 3 [NC_008544]                        | 1          | 2        | 3          | 5          | 0                        | 0        | 2          | 3          |
| 30 | Burkholderia cepacia AMMD chr. 1 [NC_008390]                              | 1          | 15       | 5          | 14         | 0                        | 0        | 0          | 3          |
| 31 | Burkholderia cepacia AMMD chr. 2 [NC_008391]                              | 1          | 13       | 2          | 12         | 0                        | 3        | 1          | 2          |
| 32 | Burkholderia cepacia AMMD chr. 3 [NC_008392]                              | 7          | 8        | 2          | 4          | 6                        | 3        | 2          | 2          |
| 33 | Burkholderia mallei ATCC 23344 chr. 1 [NC_006348]                         | 0          | 2        | 16         | 5          | 0                        | 0        | 13         | 1          |
| 34 | Burkholderia mallei ATCC 23344 chr. 2 [NC_006349]                         | 0          | 3        | 17         | 5          | 0                        | 1        | 14         | 2          |
| 35 | Burkholderia mallei NCTC 10229 chr. I [NC_008835]                         | 0          | 3        | 14         | 5          | 0                        | 0        | 9          | 1          |
| 36 | Burkholderia mallei NCTC 10229 chr. II [NC_008836]                        | 0          | 4        | 18         | 4          | 0                        | 0        | 15         | 1          |
| 37 | Burkholderia mallei NCTC 10247 chr. I [NC_009079]                         | 0          | 2        | 15         | 6          | 0                        | 0        | 10         | 2          |
| 38 | Burkholderia mallei NCTC 10247 chr. II [NC_009080]                        | 1          | 4        | 19         | 4          | 0                        | 0        | 15         | 2          |
| 39 | Burkholderia mallei SAVP1 chr. I [NC_008784]                              | 0          | 1        | 10         | 3          | 0                        | 0        | 9          | 2          |
| 40 | Burkholderia mallei SAVP1 chr. II [NC_008785]                             | 0          | 4        | 20         | 5          | 0                        | 0        | 17         | 2          |
| 41 | Burkholderia pseudomallei 1106a chr. I [NC_009076]                        | 2          | 17       | 10         | 16         | 0                        | 2        | 1          | 3          |
| 42 | Burkholderia pseudomallei 1106a chr. II [NC_009078]                       | 4          | 11       | 8          | 10         | 2                        | 1        | 3          | 3          |
| 43 | Burkholderia pseudomallei 1710b chr. I [NC_007434]                        | 7          | 25       | 9          | 18         | 0                        | 4        | 0          | 3          |
| 44 | Burkholderia pseudomallei 1710b chr. II [NC_007435]                       | 5          | 13       | 6          | 11         | 1                        | 5        | 1          | 4          |
| 45 | Burkholderia pseudomallei 668 chr. I [NC_009074]                          | 3          | 14       | 12         | 15         | 1                        | 1        | 2          | 3          |
| 46 | Burkholderia pseudomallei 668 chr. II [NC_009075]                         | 1          | 10       | 7          | 9          | 1                        | 2        | 2          | 3          |
| 47 | Burkholderia pseudomallei K96243 chr. 1 [NC_006350]                       | 2          | 19       | 10         | 15         | 1                        | 3        | 0          | 3          |
| 48 | Burkholderia pseudomallei K96243 chr. 2 [NC_006351]                       | 3          | 6        | 4          | 11         | 1                        | 1        | 0          | 6          |
| 49 | Burkholderia sp. 383 chr. 1 [NC_007510]                                   | 5          | 12       | 2          | 14         | 1                        | 1        | 0          | 4          |
| 50 | Burkholderia sp. 383 chr. 2 [NC_007511]                                   | 0          | 11       | 2          | 12         | 0                        | 2        | 0          | 3          |
| 51 | Burkholderia sp. 383 chr. 3 [NC_007509]                                   | 0          | 13       | 0          | 9          | 0                        | 5        | 0          | 3          |
| 52 | Burkholderia thailandensis E264 chr. I [NC_007651]                        | 5          | 12       | 14         | 13         | 0                        | 0        | 1          | 0          |
| 53 | Burkholderia thailandensis E264 chr. II [NC_007650]                       | 8          | 0        | 9          | 8          | 6                        | 0        | 4          | 3          |
| 54 | Burkholderia xenovorans LB400 chr. 1 [NC_007951]                          | 0          | 38       | 18         | 22         | 0                        | 6        | 2          | 4          |
| 55 | Burkholderia xenovorans LB400 chr. 2 [NC_007952]                          | 0          | 15       | 11         | 14         | 0                        | 2        | 4          | 3          |
| 56 | Burkholderia xenovorans LB400 chr. 3 [NC_007953]                          | 0          | 4        | 3          | 9          | 0                        | 0        | 2          | 5          |
| 57 | Campylobacter fetus subsp. fetus 82-40 [NC_008599]                        | 0          | 1        | 2          | 8          | 0                        | 0        | 2          | 7          |
| 58 | Campylobacter jejuni RM1221 [NC_003912]                                   | 5          | 0        | 3          | 8          | 0                        | 0        | 0          | 6          |
| 59 | Candidatus Protochlamydia amoebophila UWE25 [NC_005861]                   | 0          | 1        | 6          | 5          | 0                        | 0        | 5          | 3          |
| 60 | Caulobacter crescentus CB15 [NC_002696]                                   | 0          | 14       | 7          | 4          | 0                        | 10       | 5          | 1          |
| 61 | Clostridium acetobutylicum ATCC 824 [NC_003030]                           | 0          | 2        | 6          | 23         | 0                        | 1        | 5          | 23         |
| 62 | Clostridium difficile 630 [NC_009089]                                     | 0          | 14       | 7          | 22         | 0                        | 6        | 0          | 13         |
| 63 | Ehrlichia canis str. Jake [NC_007354]                                     | 0          | 20       | 0          | 10         | 0                        | 17       | 0          | 7          |
| 64 | Ehrlichia chaffeensis str. Arkansas [NC_007799]                           | 0          | 13       | 0          | 12         | 0                        | 12       | 0          | 11         |
| 65 | Ehrlichia ruminantium str. Gardel [NC_006831]                             | 0          | 11       | 0          | 16         | 0                        | 10       | 0          | 15         |
| 66 | Ehrlichia ruminantium str. Welgevonden [NC_005295]                        | 0          | 12       | 0          | 0          | 0                        | 12       | 0          | 0          |
| 67 | Ehrlichia ruminantium str. Welgevonden [NC_006832]                        | 0          | 10       | 0          | 15         | 0                        | 10       | 0          | 15         |
| 68 | Erythrobacter litoralis HTCC2594 [NC_007722]                              | 0          | 11       | 8          | 6          | 0                        | 3        | 2          | 1          |
| 69 | Francisella tularensis subsp. holarctica [NC_007880]                      | 0          | 0        | 9          | 15         | 0                        | 0        | 7          | 13         |
| 70 | Frankia alni ACN14a [NC_008278]                                           | 0          | 13       | 11         | 38         | 0                        | 6        | 1          | 23         |
| 71 | Frankia sp. Ccl3 [NC_007777]                                              | 0          | 14       | 25         | 25         | 0                        | 3        | 12         | 6          |
| 72 | Geobacillus kaustophilus HTA426 [NC_006510]                               | 4          | 31       | 16         | 28         | 0                        | 1        | 0          | 6          |
| 73 | Gramella forsetii KT0803 [NC_008571]                                      | 0          | 3        | 8          | 15         | 0                        | 1        | 6          | 14         |
| 74 | Haemophilus ducreyi 35000HP [NC_002940]                                   | 0          | 3        | 4          | 10         | 0                        | 2        | 4          | 9          |
| 75 | Haemophilus influenzae 86-028NP [NC_007146]                               | 3          | 4        | 3          | 7          | 2                        | 0        | 1          | 6          |
| 76 | Haemophilus somnus 129PT [NC_008309]                                      | 2          | 0        | 5          | 16         | 1                        | 0        | 3          | 15         |
| 77 | Halobacterium sp. NRC-1 [NC_002607]                                       | 0          | 8        | 6          | 0          | 0                        | 2        | 2          | 0          |
| 78 | Halorhodospira halophila SL1 [NC_008789]                                  | 0          | 11       | 6          | 12         | 0                        | 0        | 1          | 5          |
| 79 | Helicobacter acinonychis str. Sheeba [NC_008229]                          | 6          | 0        | 4          | 3          | 3                        | 0        | 3          | 1          |
| 80 | Hyphomonas neptunium ATCC 15444 [NC_008358]                               | 0          | 11       | 3          | 9          | 0                        | 2        | 1          | 3          |
| 81 | Lactobacillus johnsonii NCC 533 [NC_005362]                               | 8          | 0        | 4          | 7          | 4                        | 0        | 3          | 5          |
| 82 | Lactococcus lactis subsp. cremoris MG1363 [NC_009004]                     | 3          | 6        | 16         | 10         | 0                        | 1        | 9          | 6          |
| 83 | Lactococcus lactis subsp. cremoris SK11 [NC_008527]                       | 3          | 1        | 13         | 11         | 1                        | 0        | 11         | 7          |
| 84 | Lactococcus lactis subsp. lactis II1403 [NC_002662]                       | 1          | 1        | 11         | 9          | 0                        | 0        | 9          | 7          |
| 85 | Legionella pneumophila str. Lens [NC_006369]                              | 1          | 1        | 5          | 7          | 1                        | 0        | 5          | 6          |
| 86 | Legionella pneumophila subsp. pneumophila str. Philadelphia 1 [NC_002942] | 4          | 1        | 3          | 7          | 3                        | 0        | 2          | 6          |

|                                                                                             |            |             |             |             |               |               |               |               |
|---------------------------------------------------------------------------------------------|------------|-------------|-------------|-------------|---------------|---------------|---------------|---------------|
| 87 <i>Leifsonia xyli</i> subsp. <i>xyli</i> str. CTCB07 [NC_006087]                         | 0          | 19          | 11          | 18          | 0             | 3             | 1             | 5             |
| 88 <i>Leptospira interrogans</i> serovar Copenhageni str. Fiocruz L1-130 chr. I [NC_005823] | 0          | 0           | 10          | 8           | 0             | 0             | 7             | 5             |
| 89 <i>Leptospira interrogans</i> serovar Lai str. 56601 chr. I [NC_004342]                  | 0          | 0           | 15          | 9           | 0             | 0             | 23            | 4             |
| 90 <i>Magnetospirillum magneticum</i> AMB-1 [NC_007626]                                     | 0          | 48          | 15          | 20          | 0             | 13            | 3             | 0             |
| 91 <i>Maricaulis maris</i> MCS10 [NC_008347]                                                | 0          | 8           | 6           | 7           | 0             | 1             | 0             | 2             |
| 92 <i>Mesorhizobium loti</i> MAFF303099 [NC_002678]                                         | 0          | 40          | 17          | 17          | 0             | 16            | 5             | 1             |
| 93 <i>Methylobacillus flagellatus</i> KT [NC_007947]                                        | 0          | 9           | 3           | 13          | 0             | 5             | 2             | 11            |
| 94 <i>Mycobacterium avium</i> 104 [NC_008595]                                               | 6          | 26          | 13          | 21          | 1             | 6             | 6             | 6             |
| 95 <i>Mycobacterium avium</i> subsp. <i>paratuberculosis</i> K-10 [NC_002944]               | 3          | 16          | 9           | 12          | 0             | 6             | 6             | 3             |
| 96 <i>Mycobacterium bovis</i> AF2122/97 [NC_002945]                                         | 0          | 4           | 7           | 12          | 0             | 1             | 4             | 6             |
| 97 <i>Mycobacterium bovis</i> BCG str. Pasteur 1173P2 [NC_008769]                           | 0          | 4           | 6           | 11          | 0             | 1             | 3             | 5             |
| 98 <i>Mycobacterium smegmatis</i> str. MC2 155 [NC_008596]                                  | 0          | 33          | 17          | 14          | 0             | 13            | 7             | 3             |
| 99 <i>Mycobacterium</i> sp. JLS [NC_009077]                                                 | 0          | 29          | 16          | 16          | 0             | 6             | 4             | 2             |
| 100 <i>Mycobacterium</i> sp. KMS [NC_008705]                                                | 0          | 27          | 19          | 17          | 0             | 7             | 5             | 3             |
| 101 <i>Mycobacterium</i> sp. MCS [NC_008146]                                                | 0          | 23          | 20          | 14          | 0             | 7             | 8             | 3             |
| 102 <i>Mycobacterium ulcerans</i> Agy99 [NC_008611]                                         | 1          | 10          | 23          | 4           | 0             | 6             | 18            | 2             |
| 103 <i>Mycobacterium vanbaalenii</i> PYR-1 [NC_008726]                                      | 0          | 29          | 20          | 18          | 0             | 7             | 8             | 4             |
| 104 <i>Myxococcus xanthus</i> DK 1622 [NC_008095]                                           | 0          | 0           | 19          | 48          | 0             | 0             | 7             | 34            |
| 105 <i>Neisseria meningitidis</i> Z2491 [NC_003116]                                         | 1          | 6           | 2           | 15          | 1             | 1             | 0             | 9             |
| 106 <i>Nitrobacter hamburgensis</i> X14 [NC_007964]                                         | 0          | 18          | 15          | 7           | 0             | 10            | 9             | 3             |
| 107 <i>Nitrobacter winogradskyi</i> Nb-255 [NC_007406]                                      | 0          | 4           | 25          | 4           | 0             | 0             | 20            | 1             |
| 108 <i>Nocardia farcinica</i> IFM 10152 [NC_006361]                                         | 0          | 0           | 12          | 23          | 0             | 0             | 5             | 17            |
| 109 <i>Nocardioides</i> sp. JS614 [NC_008699]                                               | 0          | 24          | 14          | 20          | 0             | 4             | 0             | 7             |
| 110 <i>Nostoc</i> sp. PCC 7120 [NC_003272]                                                  | 18         | 1           | 9           | 14          | 14            | 1             | 5             | 9             |
| 111 <i>Novosphingobium aromaticivorans</i> DSM 12444 [NC_007794]                            | 0          | 9           | 5           | 7           | 0             | 3             | 2             | 2             |
| 112 <i>Paracoccus denitrificans</i> PD1222 chr. 1 [NC_008686]                               | 0          | 22          | 5           | 11          | 0             | 6             | 0             | 0             |
| 113 <i>Paracoccus denitrificans</i> PD1222 chr. 2 [NC_008687]                               | 0          | 8           | 5           | 7           | 0             | 3             | 1             | 3             |
| 114 <i>Photobacterium profundum</i> S59 chr. 2 [NC_006371]                                  | 0          | 17          | 9           | 5           | 0             | 14            | 6             | 2             |
| 115 <i>Polaromonas</i> sp. JS666 [NC_007948]                                                | 0          | 23          | 10          | 13          | 0             | 11            | 4             | 4             |
| 116 <i>Pyrobaculum islandicum</i> DSM 4184 [NC_008701]                                      | 0          | 0           | 8           | 15          | 0             | 0             | 3             | 11            |
| 117 <i>Pyrococcus furiosus</i> DSM 3638 [NC_003413]                                         | 0          | 4           | 4           | 18          | 0             | 0             | 0             | 14            |
| 118 <i>Ralstonia eutropha</i> H16 chr. 1 [NC_008313]                                        | 0          | 35          | 4           | 14          | 0             | 21            | 0             | 2             |
| 119 <i>Ralstonia eutropha</i> H16 chr. 2 [NC_008314]                                        | 0          | 24          | 3           | 13          | 0             | 11            | 0             | 3             |
| 120 <i>Ralstonia eutropha</i> JMP134 chr. 1 [NC_007347]                                     | 0          | 19          | 4           | 12          | 0             | 8             | 1             | 3             |
| 121 <i>Ralstonia eutropha</i> JMP134 chr. 2 [NC_007348]                                     | 0          | 9           | 1           | 8           | 0             | 3             | 0             | 3             |
| 122 <i>Ralstonia metallidurans</i> CH34 chr. 2 [NC_007974]                                  | 0          | 11          | 3           | 12          | 0             | 0             | 0             | 7             |
| 123 <i>Ralstonia solanacearum</i> GM1000 [NC_003295]                                        | 0          | 29          | 8           | 19          | 0             | 6             | 0             | 3             |
| 124 <i>Rhodobacter sphaeroides</i> 2.4.1 chr. 1 [NC_007493]                                 | 0          | 5           | 7           | 6           | 0             | 2             | 2             | 1             |
| 125 <i>Rhodobacter sphaeroides</i> 2.4.1 chr. 2 [NC_007494]                                 | 0          | 4           | 3           | 6           | 0             | 0             | 0             | 1             |
| 126 <i>Rhodobacter sphaeroides</i> ATCC 17029 chr. 1 [NC_009049]                            | 0          | 5           | 4           | 5           | 0             | 0             | 0             | 0             |
| 127 <i>Rhodobacter sphaeroides</i> ATCC 17029 chr. 2 [NC_009050]                            | 0          | 6           | 4           | 5           | 0             | 0             | 1             | 2             |
| 128 <i>Rhodococcus</i> sp. RHA1 [NC_008268]                                                 | 0          | 8           | 25          | 20          | 0             | 4             | 11            | 11            |
| 129 <i>Rhodopseudomonas palustris</i> BisA53 [NC_008435]                                    | 0          | 19          | 9           | 9           | 0             | 2             | 3             | 3             |
| 130 <i>Rhodopseudomonas palustris</i> BisB18 [NC_007925]                                    | 0          | 13          | 9           | 10          | 0             | 5             | 4             | 2             |
| 131 <i>Rhodopseudomonas palustris</i> BisB5 [NC_007958]                                     | 12         | 10          | 7           | 7           | 3             | 1             | 1             | 1             |
| 132 <i>Rhodopseudomonas palustris</i> CGA009 [NC_005296]                                    | 0          | 9           | 6           | 5           | 0             | 5             | 5             | 3             |
| 133 <i>Rhodopseudomonas palustris</i> HaA2 [NC_007778]                                      | 20         | 16          | 7           | 7           | 12            | 4             | 1             | 1             |
| 134 <i>Rhodospirillum rubrum</i> ATCC 11170 [NC_007643]                                     | 0          | 9           | 4           | 10          | 0             | 4             | 2             | 4             |
| 135 <i>Rubrobacter xylanophilus</i> DSM 9941 [NC_008148]                                    | 0          | 11          | 5           | 13          | 0             | 0             | 1             | 5             |
| 136 <i>Saccharopolyspora erythraea</i> NRRL 2338 [NC_009142]                                | 0          | 18          | 18          | 33          | 0             | 1             | 3             | 17            |
| 137 <i>Silicibacter pomeroyi</i> DSS-3 [NC_003911]                                          | 0          | 13          | 7           | 14          | 0             | 0             | 0             | 4             |
| 138 <i>Sinorhizobium meliloti</i> 1021 [NC_003047]                                          | 7          | 6           | 5           | 7           | 2             | 0             | 2             | 2             |
| 139 <i>Sphingopyxis alaskensis</i> RB2256 [NC_008048]                                       | 0          | 17          | 8           | 2           | 0             | 8             | 2             | 1             |
| 140 <i>Staphylococcus aureus</i> RF122 [NC_007622]                                          | 0          | 1           | 5           | 19          | 0             | 0             | 3             | 17            |
| 141 <i>Staphylococcus aureus</i> subsp. <i>aureus</i> MRSA252 [NC_002952]                   | 0          | 3           | 10          | 19          | 0             | 2             | 6             | 15            |
| 142 <i>Staphylococcus aureus</i> subsp. <i>aureus</i> Mu50 [NC_002758]                      | 1          | 4           | 7           | 19          | 0             | 1             | 2             | 16            |
| 143 <i>Staphylococcus aureus</i> subsp. <i>aureus</i> N315 [NC_002745]                      | 0          | 4           | 8           | 18          | 0             | 2             | 4             | 16            |
| 144 <i>Staphylococcus epidermidis</i> ATCC 12228 [NC_004461]                                | 0          | 3           | 7           | 19          | 0             | 1             | 5             | 16            |
| 145 <i>Staphylococcus haemolyticus</i> JCSC1435 [NC_007168]                                 | 0          | 0           | 10          | 19          | 0             | 0             | 8             | 17            |
| 146 <i>Streptococcus agalactiae</i> 2603V/R [NC_004116]                                     | 1          | 10          | 4           | 10          | 0             | 5             | 1             | 7             |
| 147 <i>Streptomyces avermitilis</i> MA-4680 [NC_003155]                                     | 0          | 11          | 20          | 37          | 0             | 2             | 7             | 24            |
| 148 <i>Streptomyces coelicolor</i> A3(2) [NC_003888]                                        | 0          | 29          | 17          | 44          | 0             | 4             | 3             | 21            |
| 149 <i>Sulfolobus solfataricus</i> P2 [NC_002754]                                           | 12         | 6           | 24          | 27          | 7             | 0             | 10            | 19            |
| 150 <i>Sulfolobus tokodaii</i> str. 7 [NC_003106]                                           | 0          | 14          | 7           | 25          | 0             | 6             | 2             | 18            |
| 151 <i>Symbiobacterium thermophilum</i> IAM 14863 [NC_006177]                               | 0          | 10          | 13          | 17          | 0             | 0             | 1             | 9             |
| 152 <i>Synechococcus</i> sp. CC9311 [NC_008319]                                             | 0          | 15          | 1           | 26          | 0             | 0             | 0             | 14            |
| 153 <i>Synechococcus</i> sp. CC9605 [NC_007516]                                             | 0          | 29          | 6           | 26          | 0             | 2             | 1             | 4             |
| 154 <i>Synechococcus</i> sp. CC9902 [NC_007513]                                             | 0          | 11          | 1           | 16          | 0             | 1             | 0             | 7             |
| 155 <i>Synechococcus</i> sp. WH 8102 [NC_005070]                                            | 0          | 23          | 4           | 19          | 0             | 3             | 0             | 4             |
| 156 <i>Thermosynechococcus elongatus</i> BP-1 [NC_004113]                                   | 0          | 2           | 12          | 5           | 0             | 1             | 10            | 2             |
| 157 <i>Thiobacillus denitrificans</i> ATCC 25259 [NC_007404]                                | 0          | 20          | 10          | 13          | 0             | 3             | 1             | 2             |
| 158 <i>Thiomicrospira crunigena</i> XCL-2 [NC_007520]                                       | 0          | 3           | 7           | 7           | 0             | 0             | 4             | 5             |
| 159 <i>Verminephrobacter eiseniae</i> EF01-2 [NC_008786]                                    | 0          | 48          | 15          | 36          | 0             | 13            | 6             | 7             |
| 160 <i>Vibrio cholerae</i> O1 biovar <i>eltor</i> str. N16961 chr. II [NC_002506]           | 0          | 7           | 5           | 0           | 0             | 1             | 0             | 0             |
| 161 <i>Vibrio parahaemolyticus</i> RIMD 2210633 chr. I [NC_004603]                          | 8          | 16          | 7           | 16          | 3             | 6             | 1             | 6             |
| 162 <i>Xanthomonas axonopodis</i> pv. <i>citri</i> str. 306 [NC_003919]                     | 6          | 24          | 15          | 22          | 2             | 2             | 2             | 7             |
| 163 <i>Xanthomonas campestris</i> pv. <i>campestris</i> str. 8004 [NC_007086]               | 6          | 34          | 9           | 23          | 1             | 6             | 0             | 3             |
| 164 <i>Xanthomonas campestris</i> pv. <i>campestris</i> str. ATCC 33913 [NC_003902]         | 4          | 36          | 10          | 27          | 1             | 5             | 0             | 5             |
| 165 <i>Xanthomonas campestris</i> pv. <i>vesicatoria</i> str. 85-10 [NC_007508]             | 6          | 31          | 24          | 29          | 1             | 5             | 2             | 7             |
| 166 <i>Xanthomonas oryzae</i> pv. <i>oryzae</i> KACC10331 [NC_006834]                       | 11         | 8           | 23          | 9           | 6             | 1             | 15            | 3             |
| 167 <i>Xanthomonas oryzae</i> pv. <i>oryzae</i> MAFF 311018 [NC_007705]                     | 11         | 10          | 27          | 8           | 6             | 3             | 21            | 3             |
| 168 <i>Xylella fastidiosa</i> 9a5c [NC_002488]                                              | 3          | 21          | 2           | 0           | 0             | 16            | 0             | 0             |
| 169 <i>Xylella fastidiosa</i> Temecula1 [NC_004556]                                         | 0          | 15          | 0           | 13          | 0             | 12            | 0             | 10            |
| <b>Total number of predicted and unconfirmed Gis</b>                                        | <b>302</b> | <b>2053</b> | <b>1509</b> | <b>2425</b> | <b>115</b>    | <b>583</b>    | <b>636</b>    | <b>1216</b>   |
| <b>Percentage of unconfirmed Gis</b>                                                        |            |             |             |             | <b>38.08%</b> | <b>28.40%</b> | <b>42.15%</b> | <b>50.14%</b> |

\* Unconfirmed prediction means that the GI was detected only by one of four programs
