# Supplementary material for: Mainstreams of Horizontal Gene Exchange in Enterobacteria: Consideration of the Outbreak of Enterohemorrhagic E. coli O104:H4 in Germany in 2011
Source: PubMed Central journal article supplement (PMC3195076; doi:10.1371/journal.pone.0025702), 2011-10-14
Supplement: pone.0025702.s003.pdf [file pone.0025702.s003.pdf]

Table S3. Confirmation of the SW Sniffer true positive predictions by IslandViewer programs.

| Genomic Islands predicted by SW Sniffer: NC_accession Strain [coordinates]              | IslandPick | SIGI-HMM | IslandPath | Jointly |
|-----------------------------------------------------------------------------------------|------------|----------|------------|---------|
| NC_000854:9 Aeropyrum pernix K1 chromosome I [727300-748849]                            | 0          | 1        | 0          | 1       |
| NC_000868:1 Pyrococcus abyssi GE5 chromosome I [1141250-1150799]                        | 0          | 0        | 0          | 0       |
| NC_000868:2 Pyrococcus abyssi GE5 chromosome I [1614650-1627399]                        | 0          | 0        | 0          | 0       |
| NC_000907:1 Haemophilus influenzae Rd KW20 [917150-926699]                              | 0          | 0        | 0          | 0       |
| NC_000913:11 Escherichia coli K12-MG1655 chromosome I [1086600-1095199]                 | 0          | 1        | 0          | 1       |
| NC_000913:12 Escherichia coli K12-MG1655 chromosome I [1098600-1104999]                 | 0          | 0        | 0          | 0       |
| NC_000913:14 Escherichia coli K12-MG1655 chromosome I [1205450-1222299]                 | 0          | 1        | 1          | 1       |
| NC_000913:15 Escherichia coli K12-MG1655 chromosome I [1416850-1424699]                 | 0          | 1        | 1          | 1       |
| NC_000913:16 Escherichia coli K12-MG1655 chromosome I [1428000-1434049]                 | 0          | 0        | 0          | 0       |
| NC_000913:17 Escherichia coli K12-MG1655 chromosome I [1523800-1530999]                 | 0          | 0        | 0          | 0       |
| NC_000913:19 Escherichia coli K12-MG1655 chromosome I [1571950-1588149]                 | 0          | 1        | 0          | 1       |
| NC_000913:20 Escherichia coli K12-MG1655 chromosome I [1629150-1643899]                 | 0          | 1        | 0          | 1       |
| NC_000913:22 Escherichia coli K12-MG1655 chromosome I [2030850-2043349]                 | 0          | 0        | 0          | 0       |
| NC_000913:23 Escherichia coli K12-MG1655 chromosome I [2048800-2057749]                 | 0          | 1        | 0          | 1       |
| NC_000913:24 Escherichia coli K12-MG1655 chromosome I [2096550-2110049]                 | 0          | 1        | 1          | 1       |
| NC_000913:25 Escherichia coli K12-MG1655 chromosome I [2183050-2190049]                 | 0          | 1        | 0          | 1       |
| NC_000913:26 Escherichia coli K12-MG1655 chromosome I [2378800-2386449]                 | 0          | 1        | 0          | 1       |
| NC_000913:27 Escherichia coli K12-MG1655 chromosome I [2458800-2470399]                 | 0          | 1        | 1          | 1       |
| NC_000913:28 Escherichia coli K12-MG1655 chromosome I [2476350-2492049]                 | 0          | 1        | 0          | 1       |
| NC_000913:31 Escherichia coli K12-MG1655 chromosome I [2776900-2786499]                 | 0          | 1        | 0          | 1       |
| NC_000913:32 Escherichia coli K12-MG1655 chromosome I [2876350-2883849]                 | 0          | 1        | 0          | 1       |
| NC_000913:33 Escherichia coli K12-MG1655 chromosome I [2981400-2995799]                 | 0          | 0        | 0          | 0       |
| NC_000913:35 Escherichia coli K12-MG1655 chromosome I [3261200-3267549]                 | 0          | 0        | 0          | 0       |
| NC_000913:37 Escherichia coli K12-MG1655 chromosome I [3626650-3634149]                 | 0          | 0        | 0          | 0       |
| NC_000913:40 Escherichia coli K12-MG1655 chromosome I [3790250-3804849]                 | 0          | 1        | 0          | 1       |
| NC_000913:41 Escherichia coli K12-MG1655 chromosome I [4471550-4477549]                 | 0          | 1        | 0          | 1       |
| NC_000913:42 Escherichia coli K12-MG1655 chromosome I [4497150-4505199]                 | 0          | 1        | 0          | 1       |
| NC_000913:43 Escherichia coli K12-MG1655 chromosome I [4531900-4542599]                 | 0          | 1        | 0          | 1       |
| NC_000913:44 Escherichia coli K12-MG1655 chromosome I [4569800-4577849]                 | 0          | 1        | 0          | 1       |
| NC_000913:9 Escherichia coli K12-MG1655 chromosome I [732150-737849]                    | 0          | 0        | 0          | 0       |
| NC_000915:1 Helicobacter pylori 26695 chromosome I [1052950-1064599]                    | 0          | 0        | 0          | 0       |
| NC_000916:2 Methanothermobacter thermautotrophicus Delta H chromosome I [255800-260899] | 0          | 0        | 0          | 0       |
| NC_000916:3 Methanothermobacter thermautotrophicus Delta H chromosome I [259850-263899] | 0          | 0        | 0          | 0       |
| NC_000916:4 Methanothermobacter thermautotrophicus Delta H chromosome I [264850-278299] | 0          | 1        | 0          | 1       |
| NC_000916:8 Methanothermobacter thermautotrophicus Delta H chromosome I [831900-841799] | 0          | 0        | 0          | 0       |
| NC_000917:1 Archaeoglobus fulgidus DSM4304 chromosome I [43700-51099]                   | 0          | 0        | 0          | 0       |
| NC_000917:6 Archaeoglobus fulgidus DSM4304 chromosome I [534550-556249]                 | 0          | 1        | 0          | 1       |
| NC_000917:7 Archaeoglobus fulgidus DSM4304 chromosome I [797600-804399]                 | 0          | 0        | 0          | 0       |
| NC_000918:1 Aquifex aeolicus VF5 chromosome I [249450-263299]                           | 0          | 1        | 0          | 1       |
| NC_000918:2 Aquifex aeolicus VF5 chromosome I [340650-352449]                           | 0          | 0        | 0          | 0       |
| NC_000918:5 Aquifex aeolicus VF5 chromosome I [761200-766299]                           | 0          | 0        | 0          | 0       |
| NC_000921:1 Helicobacter pylori J99 chromosome I [1041450-1058499]                      | 1          | 0        | 0          | 1       |
| NC_000961:1 Pyrococcus horikoshii OT3 chromosome I [381050-385849]                      | 0          | 0        | 0          | 0       |
| NC_000962:5 Mycobacterium tuberculosis H37Rv chromosome I [1688850-1698099]             | 0          | 0        | 0          | 0       |
| NC_000962:6 Mycobacterium tuberculosis H37Rv chromosome I [2610900-2614949]             | 0          | 0        | 0          | 0       |
| NC_000962:8 Mycobacterium tuberculosis H37Rv chromosome I [3120950-3130549]             | 0          | 0        | 0          | 0       |
| NC_000964:10 Bacillus subtilis 168 chromosome I [2052000-2072849]                       | 0          | 1        | 0          | 1       |
| NC_000964:11 Bacillus subtilis 168 chromosome I [2148850-2249149]                       | 0          | 1        | 1          | 1       |
| NC_000964:12 Bacillus subtilis 168 chromosome I [2250550-2284399]                       | 0          | 1        | 0          | 1       |
| NC_000964:13 Bacillus subtilis 168 chromosome I [2652400-2659749]                       | 0          | 0        | 1          | 1       |
| NC_000964:14 Bacillus subtilis 168 chromosome I [2706650-2726699]                       | 0          | 0        | 0          | 0       |
| NC_000964:15 Bacillus subtilis 168 chromosome I [2727300-2735799]                       | 0          | 0        | 0          | 0       |
| NC_000964:16 Bacillus subtilis 168 chromosome I [3664350-3673149]                       | 0          | 1        | 0          | 1       |
| NC_000964:17 Bacillus subtilis 168 chromosome I [3673200-3682349]                       | 0          | 0        | 0          | 0       |
| NC_000964:18 Bacillus subtilis 168 chromosome I [4120600-4133299]                       | 0          | 1        | 1          | 1       |
| NC_000964:19 Bacillus subtilis 168 chromosome I [4168350-4175549]                       | 0          | 0        | 0          | 0       |
| NC_000964:4 Bacillus subtilis 168 chromosome I [737400-745299]                          | 0          | 0        | 1          | 1       |
| NC_000964:5 Bacillus subtilis 168 chromosome I [1123300-1128849]                        | 0          | 1        | 0          | 1       |
| NC_000964:7 Bacillus subtilis 168 chromosome I [1477600-1481349]                        | 0          | 0        | 0          | 0       |
| NC_000964:8 Bacillus subtilis 168 chromosome I [1876550-1888099]                        | 0          | 0        | 0          | 0       |
| NC_000964:9 Bacillus subtilis 168 chromosome I [1896100-1904299]                        | 0          | 0        | 0          | 0       |
| NC_002570:1 Bacillus halodurans C-125 chromosome I [3194100-3200949]                    | 0          | 0        | 0          | 0       |
| NC_002570:2 Bacillus halodurans C-125 chromosome I [3830200-3840049]                    | 0          | 1        | 0          | 1       |
| NC_002570:3 Bacillus halodurans C-125 chromosome I [4122000-4144299]                    | 0          | 1        | 1          | 1       |
| NC_002608:3 Halobacterium sp. NRC-1 plasmid pNRC200 [106850-110499]                     | 0          | 0        | 0          | 0       |
| NC_002655:1 Escherichia coli O157-H7 EDL933 chromosome I [15150-24999]                  | 0          | 1        | 0          | 1       |
| NC_002655:11 Escherichia coli O157-H7 EDL933 chromosome I [1071750-1077749]             | 0          | 1        | 0          | 1       |
| NC_002655:13 Escherichia coli O157-H7 EDL933 chromosome I [1336300-1343799]             | 0          | 1        | 0          | 1       |
| NC_002655:14 Escherichia coli O157-H7 EDL933 chromosome I [1415700-1426949]             | 0          | 0        | 0          | 0       |
| NC_002655:15 Escherichia coli O157-H7 EDL933 chromosome I [1427950-1433399]             | 0          | 0        | 0          | 0       |
| NC_002655:16 Escherichia coli O157-H7 EDL933 chromosome I [1451350-1463399]             | 1          | 1        | 1          | 1       |
| NC_002655:17 Escherichia coli O157-H7 EDL933 chromosome I [1467350-1473549]             | 1          | 1        | 0          | 1       |
| NC_002655:18 Escherichia coli O157-H7 EDL933 chromosome I [1500450-1513149]             | 0          | 1        | 0          | 1       |
| NC_002655:19 Escherichia coli O157-H7 EDL933 chromosome I [1659300-1671749]             | 0          | 1        | 1          | 1       |
| NC_002655:20 Escherichia coli O157-H7 EDL933 chromosome I [1701800-1709649]             | 0          | 1        | 0          | 1       |
| NC_002655:24 Escherichia coli O157-H7 EDL933 chromosome I [1977400-1990399]             | 0          | 1        | 0          | 1       |
| NC_002655:25 Escherichia coli O157-H7 EDL933 chromosome I [2017700-2024649]             | 0          | 0        | 0          | 0       |
| NC_002655:27 Escherichia coli O157-H7 EDL933 chromosome I [2145000-2153799]             | 0          | 1        | 0          | 1       |
| NC_002655:3 Escherichia coli O157-H7 EDL933 chromosome I [303700-317399]                | 0          | 1        | 1          | 1       |
| NC_002655:31 Escherichia coli O157-H7 EDL933 chromosome I [2732600-2743699]             | 0          | 1        | 1          | 1       |
| NC_002655:32 Escherichia coli O157-H7 EDL933 chromosome I [2842700-2858849]             | 0          | 1        | 0          | 1       |
| NC_002655:33 Escherichia coli O157-H7 EDL933 chromosome I [2927800-2938199]             | 0          | 1        | 0          | 1       |
| NC_002655:34 Escherichia coli O157-H7 EDL933 chromosome I [3262500-3271549]             | 0          | 1        | 0          | 1       |
| NC_002655:35 Escherichia coli O157-H7 EDL933 chromosome I [3277100-3292249]             | 0          | 1        | 0          | 1       |
| NC_002655:36 Escherichia coli O157-H7 EDL933 chromosome I [3542900-3549799]             | 0          | 0        | 1          | 1       |

|                                                                               |   |   |   |   |
|-------------------------------------------------------------------------------|---|---|---|---|
| NC_002655:37 Escherichia coli O157-H7 EDL933 chromosome I [3553850-3567449]   | 1 | 1 | 1 | 1 |
| NC_002655:38 Escherichia coli O157-H7 EDL933 chromosome I [3568350-3577949]   | 0 | 1 | 1 | 1 |
| NC_002655:39 Escherichia coli O157-H7 EDL933 chromosome I [3772500-3804399]   | 0 | 1 | 0 | 1 |
| NC_002655:40 Escherichia coli O157-H7 EDL933 chromosome I [3923300-3935649]   | 0 | 1 | 0 | 1 |
| NC_002655:41 Escherichia coli O157-H7 EDL933 chromosome I [4070650-4076199]   | 0 | 0 | 0 | 0 |
| NC_002655:42 Escherichia coli O157-H7 EDL933 chromosome I [4430500-4436499]   | 0 | 0 | 0 | 0 |
| NC_002655:43 Escherichia coli O157-H7 EDL933 chromosome I [4574050-4580049]   | 0 | 0 | 0 | 0 |
| NC_002655:44 Escherichia coli O157-H7 EDL933 chromosome I [4610000-4616799]   | 0 | 1 | 0 | 1 |
| NC_002655:45 Escherichia coli O157-H7 EDL933 chromosome I [4656800-4694799]   | 0 | 1 | 0 | 1 |
| NC_002655:46 Escherichia coli O157-H7 EDL933 chromosome I [4752050-4761649]   | 0 | 1 | 0 | 1 |
| NC_002655:47 Escherichia coli O157-H7 EDL933 chromosome I [4863600-4867999]   | 0 | 0 | 0 | 0 |
| NC_002655:48 Escherichia coli O157-H7 EDL933 chromosome I [5359050-5365199]   | 0 | 1 | 0 | 1 |
| NC_002655:49 Escherichia coli O157-H7 EDL933 chromosome I [5386100-5398899]   | 0 | 1 | 0 | 1 |
| NC_002655:50 Escherichia coli O157-H7 EDL933 chromosome I [5419600-5428949]   | 0 | 1 | 0 | 1 |
| NC_002655:6 Escherichia coli O157-H7 EDL933 chromosome I [366800-371349]      | 0 | 1 | 0 | 1 |
| NC_002655:7 Escherichia coli O157-H7 EDL933 chromosome I [811000-816549]      | 0 | 0 | 0 | 0 |
| NC_002655:8 Escherichia coli O157-H7 EDL933 chromosome I [897450-903449]      | 0 | 0 | 0 | 0 |
| NC_002663:2 Pasteurella multocida PM70 chromosome I [688100-692749]           | 0 | 0 | 0 | 0 |
| NC_002663:4 Pasteurella multocida PM70 chromosome I [911850-923349]           | 0 | 0 | 0 | 0 |
| NC_002663:5 Pasteurella multocida PM70 chromosome I [1180550-1188149]         | 0 | 0 | 0 | 0 |
| NC_002663:6 Pasteurella multocida PM70 chromosome I [1337400-1343399]         | 0 | 0 | 0 | 0 |
| NC_002663:7 Pasteurella multocida PM70 chromosome I [2180050-2185249]         | 0 | 0 | 0 | 0 |
| NC_002695:11 Escherichia coli O157-H7-Sakai chromosome I [1331800-1341599]    | 0 | 0 | 0 | 0 |
| NC_002695:12 Escherichia coli O157-H7-Sakai chromosome I [1343100-1350099]    | 0 | 1 | 0 | 1 |
| NC_002695:13 Escherichia coli O157-H7-Sakai chromosome I [1367900-1378649]    | 0 | 1 | 1 | 1 |
| NC_002695:14 Escherichia coli O157-H7-Sakai chromosome I [1383600-1389749]    | 1 | 1 | 0 | 1 |
| NC_002695:15 Escherichia coli O157-H7-Sakai chromosome I [1416100-1429349]    | 1 | 1 | 0 | 1 |
| NC_002695:16 Escherichia coli O157-H7-Sakai chromosome I [1575250-1588199]    | 0 | 1 | 0 | 1 |
| NC_002695:17 Escherichia coli O157-H7-Sakai chromosome I [1617350-1625699]    | 0 | 1 | 1 | 1 |
| NC_002695:2 Escherichia coli O157-H7-Sakai chromosome I [237450-243249]       | 0 | 1 | 0 | 1 |
| NC_002695:22 Escherichia coli O157-H7-Sakai chromosome I [1931900-1938649]    | 0 | 1 | 0 | 1 |
| NC_002695:25 Escherichia coli O157-H7-Sakai chromosome I [2096250-2113649]    | 0 | 1 | 0 | 1 |
| NC_002695:27 Escherichia coli O157-H7-Sakai chromosome I [2657350-2668499]    | 1 | 1 | 0 | 1 |
| NC_002695:28 Escherichia coli O157-H7-Sakai chromosome I [2772500-2788649]    | 0 | 1 | 0 | 1 |
| NC_002695:29 Escherichia coli O157-H7-Sakai chromosome I [2857650-2867949]    | 0 | 1 | 0 | 1 |
| NC_002695:30 Escherichia coli O157-H7-Sakai chromosome I [3192550-3202049]    | 0 | 1 | 0 | 1 |
| NC_002695:31 Escherichia coli O157-H7-Sakai chromosome I [3207250-3222749]    | 0 | 1 | 0 | 1 |
| NC_002695:32 Escherichia coli O157-H7-Sakai chromosome I [3473100-3479549]    | 0 | 0 | 1 | 1 |
| NC_002695:33 Escherichia coli O157-H7-Sakai chromosome I [3486050-3500149]    | 1 | 1 | 1 | 1 |
| NC_002695:34 Escherichia coli O157-H7-Sakai chromosome I [3501550-3509949]    | 0 | 1 | 0 | 1 |
| NC_002695:35 Escherichia coli O157-H7-Sakai chromosome I [3705200-3736649]    | 0 | 1 | 0 | 1 |
| NC_002695:36 Escherichia coli O157-H7-Sakai chromosome I [3856350-3868349]    | 0 | 1 | 0 | 1 |
| NC_002695:37 Escherichia coli O157-H7-Sakai chromosome I [4003050-4008999]    | 0 | 0 | 0 | 0 |
| NC_002695:38 Escherichia coli O157-H7-Sakai chromosome I [4363200-4369549]    | 0 | 0 | 0 | 0 |
| NC_002695:39 Escherichia coli O157-H7-Sakai chromosome I [4384000-4389799]    | 0 | 0 | 0 | 0 |
| NC_002695:40 Escherichia coli O157-H7-Sakai chromosome I [4541000-4548049]    | 0 | 1 | 0 | 1 |
| NC_002695:41 Escherichia coli O157-H7-Sakai chromosome I [4587750-4625299]    | 0 | 1 | 0 | 1 |
| NC_002695:42 Escherichia coli O157-H7-Sakai chromosome I [4683150-4693099]    | 0 | 1 | 0 | 1 |
| NC_002695:44 Escherichia coli O157-H7-Sakai chromosome I [5329050-5335199]    | 0 | 1 | 0 | 1 |
| NC_002695:45 Escherichia coli O157-H7-Sakai chromosome I [5356600-5368899]    | 0 | 1 | 0 | 1 |
| NC_002695:46 Escherichia coli O157-H7-Sakai chromosome I [5389600-5398949]    | 0 | 1 | 0 | 1 |
| NC_002695:8 Escherichia coli O157-H7-Sakai chromosome I [896100-901799]       | 0 | 0 | 0 | 0 |
| NC_002696:1 Caulobacter crescentus CB15 chromosome I [2990900-2996899]        | 0 | 0 | 0 | 0 |
| NC_002737:5 Streptococcus pyogenes M1 GAS chromosome I [557200-565049]        | 0 | 0 | 0 | 0 |
| NC_002755:5 Mycobacterium tuberculosis CDC1551 chromosome I [1687550-1698499] | 0 | 1 | 0 | 1 |
| NC_002755:7 Mycobacterium tuberculosis CDC1551 chromosome I [2606750-2611299] | 0 | 0 | 0 | 0 |
| NC_002755:9 Mycobacterium tuberculosis CDC1551 chromosome I [3115400-3124799] | 0 | 0 | 0 | 0 |
| NC_002932:10 Chlorobium tepidum TLS chromosome I [1271450-1279799]            | 0 | 0 | 0 | 0 |
| NC_002932:14 Chlorobium tepidum TLS chromosome I [1959300-1966999]            | 0 | 0 | 0 | 0 |
| NC_002932:3 Chlorobium tepidum TLS chromosome I [225250-233899]               | 0 | 0 | 0 | 0 |
| NC_002932:4 Chlorobium tepidum TLS chromosome I [299400-307899]               | 0 | 0 | 0 | 0 |
| NC_002932:6 Chlorobium tepidum TLS chromosome I [634650-646649]               | 0 | 0 | 0 | 0 |
| NC_002932:8 Chlorobium tepidum TLS chromosome I [1046050-1051999]             | 0 | 1 | 0 | 1 |
| NC_002936:1 Dehalococcoides ethenogenes 195 chromosome I [73250-85049]        | 0 | 1 | 1 | 1 |
| NC_002936:2 Dehalococcoides ethenogenes 195 chromosome I [291150-306449]      | 1 | 0 | 0 | 1 |
| NC_002936:3 Dehalococcoides ethenogenes 195 chromosome I [801050-811299]      | 0 | 1 | 0 | 1 |
| NC_002936:4 Dehalococcoides ethenogenes 195 chromosome I [1322250-1338849]    | 0 | 1 | 1 | 1 |
| NC_002936:5 Dehalococcoides ethenogenes 195 chromosome I [1397000-1409899]    | 0 | 1 | 0 | 1 |
| NC_002946:11 Neisseria gonorrhoeae FA1090 chromosome I [1024400-1033399]      | 0 | 1 | 0 | 1 |
| NC_002946:12 Neisseria gonorrhoeae FA1090 chromosome I [1082300-1087149]      | 0 | 0 | 0 | 0 |
| NC_002946:14 Neisseria gonorrhoeae FA1090 chromosome I [1346350-1354499]      | 0 | 0 | 0 | 0 |
| NC_002946:15 Neisseria gonorrhoeae FA1090 chromosome I [1558650-1569799]      | 0 | 0 | 0 | 0 |
| NC_002946:20 Neisseria gonorrhoeae FA1090 chromosome I [1938650-1950349]      | 0 | 0 | 0 | 0 |
| NC_002946:3 Neisseria gonorrhoeae FA1090 chromosome I [225200-231149]         | 0 | 0 | 0 | 0 |
| NC_002946:5 Neisseria gonorrhoeae FA1090 chromosome I [352600-357949]         | 0 | 0 | 0 | 0 |
| NC_002947:25 Pseudomonas putida KT2440 chromosome I [5037650-5052449]         | 0 | 1 | 1 | 1 |
| NC_002950:1 Porphyromonas gingivalis W83 chromosome I [126150-142399]         | 0 | 1 | 0 | 1 |
| NC_002950:11 Porphyromonas gingivalis W83 chromosome I [1578800-1583399]      | 0 | 1 | 0 | 1 |
| NC_002950:12 Porphyromonas gingivalis W83 chromosome I [1584650-1595699]      | 0 | 1 | 0 | 1 |
| NC_002950:13 Porphyromonas gingivalis W83 chromosome I [1603150-1612799]      | 0 | 0 | 1 | 1 |
| NC_002950:5 Porphyromonas gingivalis W83 chromosome I [883100-902249]         | 0 | 1 | 0 | 1 |
| NC_002950:8 Porphyromonas gingivalis W83 chromosome I [1275300-1283299]       | 0 | 1 | 1 | 1 |
| NC_002950:9 Porphyromonas gingivalis W83 chromosome I [1516250-1529899]       | 0 | 1 | 1 | 1 |
| NC_002971:1 Coxiella burnetii RSA493 chromosome I [149000-155849]             | 0 | 1 | 0 | 1 |
| NC_002971:3 Coxiella burnetii RSA493 chromosome I [624250-638399]             | 0 | 1 | 0 | 1 |
| NC_002971:4 Coxiella burnetii RSA493 chromosome I [780550-790099]             | 0 | 0 | 0 | 0 |
| NC_002971:5 Coxiella burnetii RSA493 chromosome I [863700-868149]             | 0 | 0 | 0 | 0 |
| NC_002971:6 Coxiella burnetii RSA493 chromosome I [958000-965899]             | 0 | 0 | 0 | 0 |
| NC_002971:7 Coxiella burnetii RSA493 chromosome I [1550850-1557499]           | 0 | 1 | 0 | 1 |

|                                                                                                    |   |   |   |   |
|----------------------------------------------------------------------------------------------------|---|---|---|---|
| NC_002973:1 Listeria monocytogenes 4bF2365 chromosome I [473150-485649]                            | 0 | 1 | 0 | 1 |
| NC_002973:2 Listeria monocytogenes 4bF2365 chromosome I [1126200-1135999]                          | 0 | 0 | 0 | 0 |
| NC_002973:3 Listeria monocytogenes 4bF2365 chromosome I [2748500-2753349]                          | 0 | 0 | 0 | 0 |
| NC_002978:1 Wolbachia endosymbiont-of-Drosophila-melanogaster chromosome I [625550-631549]         | 0 | 0 | 0 | 0 |
| NC_003062:4 Agrobacterium tumefaciens C58 chromosome circular [2139250-2141649]                    | 0 | 0 | 0 | 0 |
| NC_003062:5 Agrobacterium tumefaciens C58 chromosome circular [2309750-2317799]                    | 0 | 0 | 0 | 0 |
| NC_003062:6 Agrobacterium tumefaciens C58 chromosome circular [2491350-2498149]                    | 0 | 0 | 0 | 0 |
| NC_003063:1 Agrobacterium tumefaciens C58 chromosome linear [308600-324999]                        | 0 | 0 | 0 | 0 |
| NC_003063:4 Agrobacterium tumefaciens C58 chromosome linear [1132200-1145899]                      | 0 | 0 | 0 | 0 |
| NC_003063:5 Agrobacterium tumefaciens C58 chromosome linear [1362700-1375399]                      | 0 | 0 | 0 | 0 |
| NC_003064:1 Agrobacterium tumefaciens C58 plasmid AT [26900-44199]                                 | 0 | 0 | 0 | 0 |
| NC_003065:1 Agrobacterium tumefaciens C58 plasmid Ti [32350-56499]                                 | 0 | 0 | 0 | 0 |
| NC_003106:1 Sulfolobus tokodaii 7 chromosome I [56000-65249]                                       | 0 | 0 | 0 | 0 |
| NC_003112:1 Neisseria meningitidis MC58 chromosome I [71050-81649]                                 | 0 | 0 | 0 | 0 |
| NC_003112:10 Neisseria meningitidis MC58 chromosome I [879250-884499]                              | 0 | 0 | 0 | 0 |
| NC_003112:11 Neisseria meningitidis MC58 chromosome I [1428650-1446399]                            | 0 | 1 | 1 | 1 |
| NC_003112:12 Neisseria meningitidis MC58 chromosome I [1598000-1606899]                            | 0 | 0 | 0 | 0 |
| NC_003112:14 Neisseria meningitidis MC58 chromosome I [1826050-1860549]                            | 0 | 1 | 1 | 1 |
| NC_003112:15 Neisseria meningitidis MC58 chromosome I [1866500-1872299]                            | 0 | 0 | 0 | 0 |
| NC_003112:17 Neisseria meningitidis MC58 chromosome I [2219900-2234349]                            | 0 | 1 | 0 | 1 |
| NC_003112:2 Neisseria meningitidis MC58 chromosome I [101100-112299]                               | 0 | 0 | 0 | 0 |
| NC_003112:4 Neisseria meningitidis MC58 chromosome I [368550-376049]                               | 0 | 1 | 0 | 1 |
| NC_003112:6 Neisseria meningitidis MC58 chromosome I [523900-543249]                               | 0 | 0 | 0 | 0 |
| NC_003112:8 Neisseria meningitidis MC58 chromosome I [674500-686699]                               | 0 | 1 | 0 | 1 |
| NC_003116:10 Neisseria meningitidis Z2491 [759000-773449]                                          | 0 | 0 | 1 | 1 |
| NC_003116:11 Neisseria meningitidis Z2491 [1022750-1033099]                                        | 0 | 0 | 0 | 0 |
| NC_003116:12 Neisseria meningitidis Z2491 [1393350-1399099]                                        | 0 | 0 | 0 | 0 |
| NC_003116:13 Neisseria meningitidis Z2491 [1522850-1531299]                                        | 0 | 1 | 1 | 1 |
| NC_003116:14 Neisseria meningitidis Z2491 [1735000-1742799]                                        | 0 | 0 | 0 | 0 |
| NC_003116:15 Neisseria meningitidis Z2491 [2066000-2074299]                                        | 0 | 1 | 0 | 1 |
| NC_003116:4 Neisseria meningitidis Z2491 [177600-186949]                                           | 0 | 0 | 0 | 0 |
| NC_003116:5 Neisseria meningitidis Z2491 [294900-306949]                                           | 0 | 0 | 0 | 0 |
| NC_003116:8 Neisseria meningitidis Z2491 [665050-674449]                                           | 0 | 0 | 0 | 0 |
| NC_003116:9 Neisseria meningitidis Z2491 [673050-690249]                                           | 0 | 0 | 0 | 0 |
| NC_003197:1 Salmonella typhimurium LT2 chromosome I [31050-41749]                                  | 0 | 0 | 0 | 0 |
| NC_003197:14 Salmonella typhimurium LT2 chromosome I [1172400-1180599]                             | 0 | 0 | 0 | 0 |
| NC_003197:15 Salmonella typhimurium LT2 chromosome I [1213250-1222899]                             | 0 | 1 | 0 | 1 |
| NC_003197:16 Salmonella typhimurium LT2 chromosome I [1322950-1337449]                             | 0 | 1 | 0 | 1 |
| NC_003197:17 Salmonella typhimurium LT2 chromosome I [1405150-1413549]                             | 0 | 0 | 0 | 0 |
| NC_003197:18 Salmonella typhimurium LT2 chromosome I [1473850-1502249]                             | 0 | 1 | 0 | 1 |
| NC_003197:19 Salmonella typhimurium LT2 chromosome I [1620050-1633149]                             | 0 | 1 | 0 | 1 |
| NC_003197:2 Salmonella typhimurium LT2 chromosome I [335300-345449]                                | 0 | 1 | 0 | 1 |
| NC_003197:21 Salmonella typhimurium LT2 chromosome I [1716450-1729599]                             | 0 | 1 | 0 | 1 |
| NC_003197:22 Salmonella typhimurium LT2 chromosome I [1758650-1767949]                             | 0 | 0 | 0 | 0 |
| NC_003197:23 Salmonella typhimurium LT2 chromosome I [1948950-1965349]                             | 0 | 1 | 0 | 1 |
| NC_003197:24 Salmonella typhimurium LT2 chromosome I [2157200-2178449]                             | 0 | 1 | 0 | 1 |
| NC_003197:26 Salmonella typhimurium LT2 chromosome I [2329400-2338499]                             | 0 | 1 | 0 | 1 |
| NC_003197:3 Salmonella typhimurium LT2 chromosome I [343250-350199]                                | 0 | 1 | 0 | 1 |
| NC_003197:31 Salmonella typhimurium LT2 chromosome I [2898200-2913849]                             | 1 | 1 | 1 | 1 |
| NC_003197:32 Salmonella typhimurium LT2 chromosome I [2922500-2930999]                             | 0 | 0 | 0 | 0 |
| NC_003197:33 Salmonella typhimurium LT2 chromosome I [3008450-3028949]                             | 0 | 1 | 0 | 1 |
| NC_003197:34 Salmonella typhimurium LT2 chromosome I [3039450-3048649]                             | 0 | 1 | 0 | 1 |
| NC_003197:36 Salmonella typhimurium LT2 chromosome I [3906800-3917849]                             | 0 | 1 | 0 | 1 |
| NC_003197:4 Salmonella typhimurium LT2 chromosome I [380750-391049]                                | 0 | 1 | 0 | 1 |
| NC_003197:40 Salmonella typhimurium LT2 chromosome I [4474200-4484899]                             | 0 | 1 | 0 | 1 |
| NC_003197:41 Salmonella typhimurium LT2 chromosome I [4493900-4502649]                             | 0 | 0 | 0 | 0 |
| NC_003197:42 Salmonella typhimurium LT2 chromosome I [4555550-4564249]                             | 0 | 1 | 1 | 1 |
| NC_003197:43 Salmonella typhimurium LT2 chromosome I [4752400-4760799]                             | 0 | 0 | 0 | 0 |
| NC_003197:6 Salmonella typhimurium LT2 chromosome I [608700-618099]                                | 0 | 1 | 0 | 1 |
| NC_003197:7 Salmonella typhimurium LT2 chromosome I [780000-793999]                                | 0 | 1 | 1 | 1 |
| NC_003197:9 Salmonella typhimurium LT2 chromosome I [923300-933349]                                | 0 | 1 | 0 | 1 |
| NC_003198:1 Salmonella enterica subsp. enterica serovar Typhi CT18 chromosome I [31350-40949]      | 0 | 0 | 0 | 0 |
| NC_003198:11 Salmonella enterica subsp. enterica serovar Typhi CT18 chromosome I [1081850-1090849] | 0 | 0 | 0 | 0 |
| NC_003198:12 Salmonella enterica subsp. enterica serovar Typhi CT18 chromosome I [1123500-1133049] | 0 | 1 | 0 | 1 |
| NC_003198:14 Salmonella enterica subsp. enterica serovar Typhi CT18 chromosome I [1342600-1353299] | 0 | 0 | 0 | 0 |
| NC_003198:16 Salmonella enterica subsp. enterica serovar Typhi CT18 chromosome I [1382900-1390699] | 0 | 0 | 0 | 0 |
| NC_003198:17 Salmonella enterica subsp. enterica serovar Typhi CT18 chromosome I [1452500-1457349] | 0 | 0 | 0 | 0 |
| NC_003198:18 Salmonella enterica subsp. enterica serovar Typhi CT18 chromosome I [1465150-1478449] | 0 | 1 | 0 | 1 |
| NC_003198:19 Salmonella enterica subsp. enterica serovar Typhi CT18 chromosome I [1622850-1650099] | 0 | 1 | 0 | 1 |
| NC_003198:21 Salmonella enterica subsp. enterica serovar Typhi CT18 chromosome I [1774100-1791899] | 0 | 1 | 1 | 1 |
| NC_003198:22 Salmonella enterica subsp. enterica serovar Typhi CT18 chromosome I [1871000-1891049] | 0 | 1 | 0 | 1 |
| NC_003198:23 Salmonella enterica subsp. enterica serovar Typhi CT18 chromosome I [1913250-1926849] | 0 | 1 | 1 | 1 |
| NC_003198:24 Salmonella enterica subsp. enterica serovar Typhi CT18 chromosome I [2113950-2136899] | 0 | 1 | 0 | 1 |
| NC_003198:25 Salmonella enterica subsp. enterica serovar Typhi CT18 chromosome I [2185800-2197999] | 0 | 1 | 0 | 1 |
| NC_003198:27 Salmonella enterica subsp. enterica serovar Typhi CT18 chromosome I [2458300-2466499] | 0 | 0 | 0 | 0 |
| NC_003198:28 Salmonella enterica subsp. enterica serovar Typhi CT18 chromosome I [2775550-2784049] | 0 | 0 | 0 | 0 |
| NC_003198:29 Salmonella enterica subsp. enterica serovar Typhi CT18 chromosome I [2861200-2880949] | 0 | 1 | 0 | 1 |
| NC_003198:3 Salmonella enterica subsp. enterica serovar Typhi CT18 chromosome I [345250-351699]    | 0 | 1 | 0 | 1 |
| NC_003198:30 Salmonella enterica subsp. enterica serovar Typhi CT18 chromosome I [2891700-2899099] | 0 | 0 | 0 | 0 |
| NC_003198:33 Salmonella enterica subsp. enterica serovar Typhi CT18 chromosome I [3130450-3140999] | 0 | 1 | 0 | 1 |
| NC_003198:37 Salmonella enterica subsp. enterica serovar Typhi CT18 chromosome I [3928650-3940349] | 0 | 1 | 0 | 1 |
| NC_003198:39 Salmonella enterica subsp. enterica serovar Typhi CT18 chromosome I [4400500-4430349] | 0 | 1 | 0 | 1 |
| NC_003198:4 Salmonella enterica subsp. enterica serovar Typhi CT18 chromosome I [350500-360399]    | 0 | 1 | 0 | 1 |
| NC_003198:40 Salmonella enterica subsp. enterica serovar Typhi CT18 chromosome I [4338700-4347799] | 0 | 0 | 0 | 0 |
| NC_003198:41 Salmonella enterica subsp. enterica serovar Typhi CT18 chromosome I [4400500-4409099] | 0 | 1 | 1 | 1 |
| NC_003198:43 Salmonella enterica subsp. enterica serovar Typhi CT18 chromosome I [4453100-4464249] | 1 | 1 | 0 | 1 |
| NC_003198:44 Salmonella enterica subsp. enterica serovar Typhi CT18 chromosome I [4494850-4499699] | 0 | 0 | 0 | 0 |
| NC_003198:45 Salmonella enterica subsp. enterica serovar Typhi CT18 chromosome I [4518750-4534799] | 1 | 1 | 1 | 1 |
| NC_003198:47 Salmonella enterica subsp. enterica serovar Typhi CT18 chromosome I [4693000-4703449] | 0 | 1 | 0 | 1 |

|                                                                                                 |   |   |   |   |
|-------------------------------------------------------------------------------------------------|---|---|---|---|
| NC_003198:7 Salmonella enterica subsp. enterica serovar Typhi CT18 chromosome I [601350-610049] | 0 | 1 | 0 | 1 |
| NC_003198:8 Salmonella enterica subsp. enterica serovar Typhi CT18 chromosome I [756350-769199] | 0 | 1 | 1 | 1 |
| NC_003210:1 Listeria monocytogenes EGD-e chromosome I [331400-336799]                           | 0 | 0 | 0 | 0 |
| NC_003210:2 Listeria monocytogenes EGD-e chromosome I [1151350-1159249]                         | 0 | 0 | 0 | 0 |
| NC_003212:1 Listeria innocua Clip11262 chromosome I [498500-504299]                             | 0 | 0 | 0 | 0 |
| NC_003228:1 Bacteroides fragilis NCTC 9343 chromosome I [897550-909099]                         | 0 | 1 | 0 | 1 |
| NC_003228:2 Bacteroides fragilis NCTC 9343 chromosome I [1798900-1803149]                       | 0 | 0 | 0 | 0 |
| NC_003228:3 Bacteroides fragilis NCTC 9343 chromosome I [3260900-3266249]                       | 0 | 1 | 0 | 1 |
| NC_003228:4 Bacteroides fragilis NCTC 9343 chromosome I [3380900-3386699]                       | 0 | 1 | 0 | 1 |
| NC_003228:5 Bacteroides fragilis NCTC 9343 chromosome I [4081150-4087449]                       | 0 | 1 | 0 | 1 |
| NC_003304:4 Agrobacterium tumefaciens C58 chromosome circular [2139350-2144949]                 | 0 | 0 | 0 | 0 |
| NC_003304:5 Agrobacterium tumefaciens C58 chromosome circular [2309850-2315299]                 | 0 | 0 | 0 | 0 |
| NC_003304:6 Agrobacterium tumefaciens C58 chromosome circular [2491450-2498249]                 | 0 | 0 | 0 | 0 |
| NC_003305:2 Agrobacterium tumefaciens C58 linear chromosome [696950-711449]                     | 0 | 0 | 0 | 0 |
| NC_003305:3 Agrobacterium tumefaciens C58 linear chromosome [926250-939199]                     | 0 | 0 | 0 | 0 |
| NC_003305:6 Agrobacterium tumefaciens C58 linear chromosome [1747150-1762599]                   | 0 | 0 | 0 | 0 |
| NC_003306:1 Agrobacterium tumefaciens str. C58 (U. Washington) plasmid AT [26600-43899]         | 0 | 0 | 0 | 0 |
| NC_003308:1 Agrobacterium tumefaciens str. C58 (U. Washington) plasmid Ti [850-22999]           | 0 | 0 | 0 | 0 |
| NC_003317:4 Brucella melitensis 16M chromosome I [932650-941099]                                | 0 | 1 | 1 | 1 |
| NC_003317:5 Brucella melitensis 16M chromosome I [1032550-1049499]                              | 0 | 1 | 1 | 1 |
| NC_003317:6 Brucella melitensis 16M chromosome I [1204750-1210549]                              | 0 | 0 | 1 | 1 |
| NC_003317:7 Brucella melitensis 16M chromosome I [1266100-1281349]                              | 0 | 1 | 0 | 1 |
| NC_003317:8 Brucella melitensis 16M chromosome I [1447200-1468399]                              | 0 | 1 | 1 | 1 |
| NC_003317:9 Brucella melitensis 16M chromosome I [1707800-1715849]                              | 0 | 1 | 0 | 1 |
| NC_003318:10 Brucella melitensis 16M chromosome II [1134250-1139299]                            | 0 | 0 | 0 | 0 |
| NC_003318:2 Brucella melitensis 16M chromosome II [254800-259049]                               | 0 | 0 | 0 | 0 |
| NC_003318:4 Brucella melitensis 16M chromosome II [678000-686149]                               | 0 | 0 | 0 | 0 |
| NC_003318:5 Brucella melitensis 16M chromosome II [745050-753299]                               | 0 | 0 | 1 | 1 |
| NC_003318:6 Brucella melitensis 16M chromosome II [839900-844249]                               | 0 | 0 | 0 | 0 |
| NC_003318:7 Brucella melitensis 16M chromosome II [941600-951299]                               | 0 | 0 | 0 | 0 |
| NC_003552:1 Methanosarcina acetivorans C2A chromosome I [1250500-1258999]                       | 0 | 1 | 1 | 1 |
| NC_003552:10 Methanosarcina acetivorans C2A chromosome I [3225900-3234349]                      | 0 | 0 | 0 | 0 |
| NC_003552:11 Methanosarcina acetivorans C2A chromosome I [3358550-3362299]                      | 0 | 0 | 0 | 0 |
| NC_003552:12 Methanosarcina acetivorans C2A chromosome I [4118800-4122899]                      | 0 | 0 | 0 | 0 |
| NC_003552:13 Methanosarcina acetivorans C2A chromosome I [4323250-4326599]                      | 0 | 1 | 0 | 1 |
| NC_003552:14 Methanosarcina acetivorans C2A chromosome I [4641650-4658449]                      | 0 | 1 | 0 | 1 |
| NC_003552:15 Methanosarcina acetivorans C2A chromosome I [4719850-4724699]                      | 0 | 0 | 0 | 0 |
| NC_003552:2 Methanosarcina acetivorans C2A chromosome I [1403150-1409949]                       | 0 | 1 | 0 | 1 |
| NC_003552:3 Methanosarcina acetivorans C2A chromosome I [1831400-1835049]                       | 0 | 0 | 0 | 0 |
| NC_003552:4 Methanosarcina acetivorans C2A chromosome I [1844650-1854299]                       | 0 | 1 | 0 | 1 |
| NC_003552:5 Methanosarcina acetivorans C2A chromosome I [2318750-2336149]                       | 0 | 1 | 0 | 1 |
| NC_003552:6 Methanosarcina acetivorans C2A chromosome I [2510050-2517099]                       | 0 | 1 | 0 | 1 |
| NC_003552:7 Methanosarcina acetivorans C2A chromosome I [2639650-2645849]                       | 0 | 0 | 0 | 0 |
| NC_003552:8 Methanosarcina acetivorans C2A chromosome I [2682650-2693299]                       | 0 | 0 | 1 | 1 |
| NC_003552:9 Methanosarcina acetivorans C2A chromosome I [2955950-2960199]                       | 0 | 0 | 0 | 0 |
| NC_003869:5 Thermoanaerobacter tengcongensis MB4T chromosome I [1652350-1660099]                | 0 | 0 | 0 | 0 |
| NC_003901:1 Methanosarcina mazei Go1 chromosome I [37900-40499]                                 | 0 | 0 | 0 | 0 |
| NC_003901:10 Methanosarcina mazei Go1 chromosome I [3208250-3218049]                            | 0 | 1 | 0 | 1 |
| NC_003901:11 Methanosarcina mazei Go1 chromosome I [3297600-3305899]                            | 0 | 0 | 0 | 0 |
| NC_003901:12 Methanosarcina mazei Go1 chromosome I [3553750-3557999]                            | 0 | 0 | 0 | 0 |
| NC_003901:13 Methanosarcina mazei Go1 chromosome I [3671850-3677399]                            | 0 | 0 | 1 | 1 |
| NC_003901:14 Methanosarcina mazei Go1 chromosome I [3838350-3842549]                            | 0 | 0 | 0 | 0 |
| NC_003901:15 Methanosarcina mazei Go1 chromosome I [3846250-3849799]                            | 0 | 0 | 0 | 0 |
| NC_003901:2 Methanosarcina mazei Go1 chromosome I [780150-785249]                               | 0 | 1 | 0 | 1 |
| NC_003901:3 Methanosarcina mazei Go1 chromosome I [1031500-1036299]                             | 0 | 1 | 0 | 1 |
| NC_003901:5 Methanosarcina mazei Go1 chromosome I [1389100-1396999]                             | 0 | 1 | 0 | 1 |
| NC_003901:6 Methanosarcina mazei Go1 chromosome I [1951450-1962049]                             | 0 | 1 | 0 | 1 |
| NC_003901:7 Methanosarcina mazei Go1 chromosome I [2416000-2421349]                             | 0 | 0 | 0 | 0 |
| NC_003901:8 Methanosarcina mazei Go1 chromosome I [2504100-2519299]                             | 0 | 1 | 0 | 1 |
| NC_003901:9 Methanosarcina mazei Go1 chromosome I [2627500-2636749]                             | 0 | 0 | 0 | 0 |
| NC_003910:1 Colwellia psychrerythraea 34H chromosome I [493800-502199]                          | 0 | 0 | 0 | 0 |
| NC_003910:2 Colwellia psychrerythraea 34H chromosome I [2183150-2189099]                        | 0 | 0 | 0 | 0 |
| NC_004129:11 Pseudomonas fluorescens Pf-5 chromosome I [6265000-6276999]                        | 0 | 0 | 0 | 0 |
| NC_004193:1 Oceanobacillus ihayensis HTE831 chromosome I [2972050-2978299]                      | 0 | 0 | 0 | 0 |
| NC_004310:1 Brucella suis 1330 chromosome I [264950-272949]                                     | 0 | 1 | 0 | 1 |
| NC_004310:2 Brucella suis 1330 chromosome I [512200-535549]                                     | 0 | 1 | 1 | 1 |
| NC_004310:3 Brucella suis 1330 chromosome I [710750-719599]                                     | 0 | 1 | 0 | 1 |
| NC_004310:4 Brucella suis 1330 chromosome I [771500-778099]                                     | 0 | 1 | 0 | 1 |
| NC_004310:5 Brucella suis 1330 chromosome I [935400-941749]                                     | 0 | 0 | 1 | 1 |
| NC_004310:6 Brucella suis 1330 chromosome I [942500-952899]                                     | 0 | 1 | 0 | 1 |
| NC_004310:7 Brucella suis 1330 chromosome I [1047250-1054349]                                   | 0 | 1 | 0 | 1 |
| NC_004310:8 Brucella suis 1330 chromosome I [1543900-1546699]                                   | 0 | 0 | 0 | 0 |
| NC_004311:1 Brucella suis 1330 chromosome II [128450-133499]                                    | 0 | 0 | 0 | 0 |
| NC_004311:3 Brucella suis 1330 chromosome II [317000-324649]                                    | 0 | 0 | 0 | 0 |
| NC_004311:4 Brucella suis 1330 chromosome II [441700-447049]                                    | 0 | 0 | 0 | 0 |
| NC_004311:5 Brucella suis 1330 chromosome II [536000-542049]                                    | 0 | 0 | 1 | 1 |
| NC_004311:6 Brucella suis 1330 chromosome II [602850-608699]                                    | 0 | 0 | 0 | 0 |
| NC_004337:1 Shigella flexneri 2a-301 chromosome I [313750-330349]                               | 0 | 1 | 1 | 1 |
| NC_004337:10 Shigella flexneri 2a-301 chromosome I [1756200-1765499]                            | 0 | 0 | 0 | 0 |
| NC_004337:12 Shigella flexneri 2a-301 chromosome I [2004750-2012199]                            | 0 | 0 | 1 | 1 |
| NC_004337:13 Shigella flexneri 2a-301 chromosome I [2035400-2048049]                            | 0 | 1 | 0 | 1 |
| NC_004337:15 Shigella flexneri 2a-301 chromosome I [2102850-2118699]                            | 0 | 1 | 0 | 1 |
| NC_004337:19 Shigella flexneri 2a-301 chromosome I [2481450-2493299]                            | 0 | 1 | 0 | 1 |
| NC_004337:2 Shigella flexneri 2a-301 chromosome I [371950-379449]                               | 0 | 1 | 0 | 1 |
| NC_004337:24 Shigella flexneri 2a-301 chromosome I [3076600-3085249]                            | 0 | 1 | 0 | 1 |
| NC_004337:26 Shigella flexneri 2a-301 chromosome I [3254600-3260999]                            | 0 | 0 | 0 | 0 |
| NC_004337:27 Shigella flexneri 2a-301 chromosome I [3593000-3604749]                            | 0 | 1 | 1 | 1 |
| NC_004337:28 Shigella flexneri 2a-301 chromosome I [3624500-3635699]                            | 0 | 0 | 0 | 0 |
| NC_004337:29 Shigella flexneri 2a-301 chromosome I [3764500-3774499]                            | 0 | 1 | 0 | 1 |

|                                                                           |   |   |   |   |
|---------------------------------------------------------------------------|---|---|---|---|
| NC_004337:33 Shigella flexneri 2a-301 chromosome I [3908750-3916649]      | 0 | 0 | 0 | 0 |
| NC_004337:34 Shigella flexneri 2a-301 chromosome I [4377300-4388949]      | 0 | 1 | 0 | 1 |
| NC_004337:6 Shigella flexneri 2a-301 chromosome I [1073650-1082449]       | 0 | 0 | 0 | 0 |
| NC_004337:7 Shigella flexneri 2a-301 chromosome I [1195850-1202899]       | 0 | 0 | 0 | 0 |
| NC_004347:1 Shewanella oneidensis MR-1 chromosome I [723250-729149]       | 0 | 1 | 0 | 1 |
| NC_004347:12 Shewanella oneidensis MR-1 chromosome I [4449500-4469549]    | 0 | 1 | 0 | 1 |
| NC_004347:2 Shewanella oneidensis MR-1 chromosome I [794700-801149]       | 0 | 0 | 0 | 0 |
| NC_004347:6 Shewanella oneidensis MR-1 chromosome I [3200950-3208899]     | 0 | 1 | 0 | 1 |
| NC_004347:7 Shewanella oneidensis MR-1 chromosome I [3310750-3326849]     | 0 | 1 | 0 | 1 |
| NC_004431:10 Escherichia coli CFT073 chromosome I [410150-414249]         | 0 | 0 | 0 | 0 |
| NC_004431:13 Escherichia coli CFT073 chromosome I [1122900-1134849]       | 0 | 0 | 0 | 0 |
| NC_004431:14 Escherichia coli CFT073 chromosome I [1170500-1196499]       | 1 | 1 | 0 | 1 |
| NC_004431:15 Escherichia coli CFT073 chromosome I [1213500-1223799]       | 0 | 1 | 0 | 1 |
| NC_004431:16 Escherichia coli CFT073 chromosome I [1407250-1412099]       | 0 | 1 | 0 | 1 |
| NC_004431:17 Escherichia coli CFT073 chromosome I [1416000-1423049]       | 0 | 0 | 0 | 0 |
| NC_004431:18 Escherichia coli CFT073 chromosome I [1447900-1463299]       | 0 | 1 | 0 | 1 |
| NC_004431:19 Escherichia coli CFT073 chromosome I [1648700-1654249]       | 0 | 0 | 0 | 0 |
| NC_004431:22 Escherichia coli CFT073 chromosome I [1795500-1803199]       | 0 | 1 | 0 | 1 |
| NC_004431:23 Escherichia coli CFT073 chromosome I [2158850-2163049]       | 0 | 0 | 0 | 0 |
| NC_004431:24 Escherichia coli CFT073 chromosome I [2184450-2216749]       | 0 | 1 | 0 | 1 |
| NC_004431:27 Escherichia coli CFT073 chromosome I [2318650-2333749]       | 0 | 1 | 0 | 1 |
| NC_004431:28 Escherichia coli CFT073 chromosome I [2388300-2401549]       | 0 | 1 | 0 | 1 |
| NC_004431:29 Escherichia coli CFT073 chromosome I [2451250-2459349]       | 0 | 1 | 0 | 1 |
| NC_004431:30 Escherichia coli CFT073 chromosome I [2476700-2482999]       | 0 | 1 | 0 | 1 |
| NC_004431:31 Escherichia coli CFT073 chromosome I [2752200-2761199]       | 0 | 0 | 1 | 1 |
| NC_004431:32 Escherichia coli CFT073 chromosome I [2761150-2776849]       | 0 | 1 | 0 | 1 |
| NC_004431:34 Escherichia coli CFT073 chromosome I [3045550-3052099]       | 0 | 0 | 0 | 0 |
| NC_004431:36 Escherichia coli CFT073 chromosome I [3248900-3254899]       | 0 | 0 | 0 | 0 |
| NC_004431:37 Escherichia coli CFT073 chromosome I [3411600-3425099]       | 0 | 1 | 0 | 1 |
| NC_004431:4 Escherichia coli CFT073 chromosome I [282950-304499]          | 1 | 1 | 0 | 1 |
| NC_004431:40 Escherichia coli CFT073 chromosome I [3469850-3478249]       | 1 | 0 | 0 | 1 |
| NC_004431:41 Escherichia coli CFT073 chromosome I [3516200-3529949]       | 0 | 1 | 0 | 1 |
| NC_004431:43 Escherichia coli CFT073 chromosome I [3989800-3999949]       | 0 | 1 | 0 | 1 |
| NC_004431:44 Escherichia coli CFT073 chromosome I [4227950-4234799]       | 0 | 1 | 0 | 1 |
| NC_004431:45 Escherichia coli CFT073 chromosome I [4271800-4282749]       | 0 | 1 | 0 | 1 |
| NC_004431:46 Escherichia coli CFT073 chromosome I [4294100-4304299]       | 0 | 0 | 0 | 0 |
| NC_004431:47 Escherichia coli CFT073 chromosome I [4651600-4657299]       | 0 | 1 | 0 | 1 |
| NC_004431:48 Escherichia coli CFT073 chromosome I [4932650-4936599]       | 0 | 0 | 1 | 1 |
| NC_004431:49 Escherichia coli CFT073 chromosome I [4958750-4968249]       | 0 | 0 | 1 | 1 |
| NC_004431:50 Escherichia coli CFT073 chromosome I [5128800-5138249]       | 0 | 0 | 0 | 0 |
| NC_004431:8 Escherichia coli CFT073 chromosome I [369350-377999]          | 0 | 0 | 1 | 1 |
| NC_004431:9 Escherichia coli CFT073 chromosome I [384200-391149]          | 0 | 1 | 0 | 1 |
| NC_004547:15 Erwinia carotovora SCRI1043 chromosome I [1605200-1635399]   | 0 | 1 | 0 | 1 |
| NC_004547:18 Erwinia carotovora SCRI1043 chromosome I [1878000-1936849]   | 0 | 1 | 1 | 1 |
| NC_004547:19 Erwinia carotovora SCRI1043 chromosome I [1973400-1986899]   | 0 | 1 | 0 | 1 |
| NC_004547:2 Erwinia carotovora SCRI1043 chromosome I [168700-182149]      | 0 | 1 | 0 | 1 |
| NC_004547:20 Erwinia carotovora SCRI1043 chromosome I [2011700-2018499]   | 0 | 0 | 0 | 0 |
| NC_004547:29 Erwinia carotovora SCRI1043 chromosome I [3212650-3263049]   | 0 | 1 | 1 | 1 |
| NC_004547:7 Erwinia carotovora SCRI1043 chromosome I [641800-652449]      | 0 | 1 | 0 | 1 |
| NC_004567:1 Lactobacillus plantarum WCFS1 chromosome I [348400-355099]    | 0 | 0 | 0 | 0 |
| NC_004567:10 Lactobacillus plantarum WCFS1 chromosome I [1802150-1812349] | 0 | 0 | 1 | 1 |
| NC_004567:12 Lactobacillus plantarum WCFS1 chromosome I [2797150-2802449] | 0 | 0 | 0 | 0 |
| NC_004567:13 Lactobacillus plantarum WCFS1 chromosome I [2806350-2810599] | 0 | 0 | 0 | 0 |
| NC_004567:14 Lactobacillus plantarum WCFS1 chromosome I [3127950-3135149] | 0 | 0 | 0 | 0 |
| NC_004567:15 Lactobacillus plantarum WCFS1 chromosome I [3158000-3163499] | 0 | 0 | 0 | 0 |
| NC_004567:16 Lactobacillus plantarum WCFS1 chromosome I [3191350-3201299] | 0 | 0 | 0 | 0 |
| NC_004567:2 Lactobacillus plantarum WCFS1 chromosome I [363700-375949]    | 0 | 0 | 0 | 0 |
| NC_004567:3 Lactobacillus plantarum WCFS1 chromosome I [430700-440899]    | 0 | 0 | 0 | 0 |
| NC_004567:7 Lactobacillus plantarum WCFS1 chromosome I [1071550-1084449]  | 0 | 0 | 0 | 0 |
| NC_004567:9 Lactobacillus plantarum WCFS1 chromosome I [1538650-1545249]  | 0 | 0 | 0 | 0 |
| NC_004578:2 Pseudomonas syringae DC3000 chromosome I [24550-44999]        | 1 | 1 | 1 | 1 |
| NC_004578:51 Pseudomonas syringae DC3000 chromosome I [537950-5382149]    | 0 | 1 | 0 | 1 |
| NC_004578:52 Pseudomonas syringae DC3000 chromosome I [5388650-5404999]   | 0 | 0 | 1 | 1 |
| NC_004578:61 Pseudomonas syringae DC3000 chromosome I [6339850-6352599]   | 0 | 1 | 0 | 1 |
| NC_004606:6 Streptococcus pyogenes SSI-1 chromosome I [476450-479749]     | 0 | 0 | 0 | 0 |
| NC_004606:8 Streptococcus pyogenes SSI-1 chromosome I [651400-658999]     | 0 | 0 | 0 | 0 |
| NC_004606:9 Streptococcus pyogenes SSI-1 chromosome I [907950-913949]     | 0 | 0 | 0 | 0 |
| NC_004631:10 Salmonella enterica Ty2 chromosome I [1328750-1356649]       | 0 | 1 | 0 | 1 |
| NC_004631:11 Salmonella enterica Ty2 chromosome I [1506050-1514549]       | 0 | 1 | 0 | 1 |
| NC_004631:12 Salmonella enterica Ty2 chromosome I [1522550-1528149]       | 0 | 0 | 0 | 0 |
| NC_004631:13 Salmonella enterica Ty2 chromosome I [1588250-1596249]       | 0 | 0 | 0 | 0 |
| NC_004631:15 Salmonella enterica Ty2 chromosome I [1629000-1637799]       | 0 | 0 | 0 | 0 |
| NC_004631:17 Salmonella enterica Ty2 chromosome I [1845000-1853899]       | 0 | 1 | 0 | 1 |
| NC_004631:18 Salmonella enterica Ty2 chromosome I [1887650-1896699]       | 0 | 0 | 1 | 1 |
| NC_004631:2 Salmonella enterica Ty2 chromosome I [535650-544949]          | 0 | 0 | 0 | 0 |
| NC_004631:20 Salmonella enterica Ty2 chromosome I [2209850-2222349]       | 0 | 1 | 0 | 1 |
| NC_004631:21 Salmonella enterica Ty2 chromosome I [2370400-2377849]       | 0 | 1 | 0 | 1 |
| NC_004631:23 Salmonella enterica Ty2 chromosome I [2588500-2598149]       | 0 | 1 | 0 | 1 |
| NC_004631:24 Salmonella enterica Ty2 chromosome I [2618900-2627249]       | 0 | 1 | 0 | 1 |
| NC_004631:25 Salmonella enterica Ty2 chromosome I [2625700-2633699]       | 0 | 1 | 0 | 1 |
| NC_004631:26 Salmonella enterica Ty2 chromosome I [2633550-2640299]       | 0 | 1 | 0 | 1 |
| NC_004631:27 Salmonella enterica Ty2 chromosome I [2762350-2769799]       | 0 | 0 | 0 | 0 |
| NC_004631:28 Salmonella enterica Ty2 chromosome I [2847050-2866799]       | 0 | 1 | 0 | 1 |
| NC_004631:29 Salmonella enterica Ty2 chromosome I [2877500-2884999]       | 0 | 0 | 0 | 0 |
| NC_004631:32 Salmonella enterica Ty2 chromosome I [3115950-3127799]       | 0 | 1 | 0 | 1 |
| NC_004631:36 Salmonella enterica Ty2 chromosome I [3914150-3925849]       | 0 | 1 | 0 | 1 |
| NC_004631:38 Salmonella enterica Ty2 chromosome I [4304900-4314999]       | 0 | 1 | 0 | 1 |
| NC_004631:39 Salmonella enterica Ty2 chromosome I [4323700-4332449]       | 0 | 0 | 0 | 0 |
| NC_004631:4 Salmonella enterica Ty2 chromosome I [803700-815149]          | 0 | 1 | 0 | 1 |

|                                                                                  |   |   |   |   |
|----------------------------------------------------------------------------------|---|---|---|---|
| NC_004631:40 Salmonella enterica Ty2 chromosome I [4385150-4393599]              | 0 | 1 | 1 | 1 |
| NC_004631:42 Salmonella enterica Ty2 chromosome I [4441900-4447849]              | 1 | 1 | 0 | 1 |
| NC_004631:43 Salmonella enterica Ty2 chromosome I [4478900-4483699]              | 0 | 0 | 0 | 0 |
| NC_004631:44 Salmonella enterica Ty2 chromosome I [4501350-4517799]              | 0 | 1 | 1 | 1 |
| NC_004631:46 Salmonella enterica Ty2 chromosome I [4676100-4685499]              | 0 | 0 | 0 | 0 |
| NC_004631:47 Salmonella enterica Ty2 chromosome I [4696650-4707749]              | 0 | 0 | 0 | 0 |
| NC_004631:5 Salmonella enterica Ty2 chromosome I [865850-887849]                 | 0 | 1 | 0 | 1 |
| NC_004631:6 Salmonella enterica Ty2 chromosome I [952500-978749]                 | 0 | 1 | 0 | 1 |
| NC_004631:7 Salmonella enterica Ty2 chromosome I [1093300-1108849]               | 0 | 1 | 0 | 1 |
| NC_004631:8 Salmonella enterica Ty2 chromosome I [1186900-1204199]               | 0 | 1 | 1 | 1 |
| NC_004631:9 Salmonella enterica Ty2 chromosome I [1273600-1281999]               | 0 | 0 | 0 | 0 |
| NC_004663:1 Bacteroides thetaiotaomicron VPI-5482 chromosome I [472550-480149]   | 0 | 0 | 0 | 0 |
| NC_004663:2 Bacteroides thetaiotaomicron VPI-5482 chromosome I [813200-817599]   | 0 | 1 | 0 | 1 |
| NC_004663:3 Bacteroides thetaiotaomicron VPI-5482 chromosome I [1142500-1160799] | 0 | 0 | 1 | 1 |
| NC_004663:4 Bacteroides thetaiotaomicron VPI-5482 chromosome I [1668300-1679999] | 0 | 0 | 0 | 0 |
| NC_004663:5 Bacteroides thetaiotaomicron VPI-5482 chromosome I [5641250-5646199] | 0 | 0 | 0 | 0 |
| NC_004668:1 Enterococcus faecalis V583 chromosome I [131150-134949]              | 0 | 0 | 0 | 0 |
| NC_004668:2 Enterococcus faecalis V583 chromosome I [483950-490149]              | 0 | 1 | 0 | 1 |
| NC_004668:3 Enterococcus faecalis V583 chromosome I [496650-502649]              | 0 | 0 | 0 | 0 |
| NC_004668:4 Enterococcus faecalis V583 chromosome I [514350-521249]              | 0 | 0 | 0 | 0 |
| NC_004668:5 Enterococcus faecalis V583 chromosome I [562500-566649]              | 0 | 1 | 0 | 1 |
| NC_004668:6 Enterococcus faecalis V583 chromosome I [566500-571749]              | 0 | 0 | 0 | 0 |
| NC_004722:1 Bacillus cereus ATCC14579 chromosome I [4987050-4991049]             | 0 | 0 | 0 | 0 |
| NC_004741:1 Shigella flexneri 2a-2457T chromosome I [312750-329499]              | 0 | 1 | 1 | 1 |
| NC_004741:10 Shigella flexneri 2a-2457T chromosome I [1794150-1802699]           | 0 | 0 | 0 | 0 |
| NC_004741:12 Shigella flexneri 2a-2457T chromosome I [1981650-1988849]           | 0 | 0 | 0 | 0 |
| NC_004741:13 Shigella flexneri 2a-2457T chromosome I [2010550-2023449]           | 0 | 1 | 1 | 1 |
| NC_004741:15 Shigella flexneri 2a-2457T chromosome I [2085750-2100949]           | 0 | 1 | 0 | 1 |
| NC_004741:16 Shigella flexneri 2a-2457T chromosome I [2172050-2179499]           | 0 | 0 | 0 | 0 |
| NC_004741:17 Shigella flexneri 2a-2457T chromosome I [2448000-2454399]           | 0 | 0 | 0 | 0 |
| NC_004741:18 Shigella flexneri 2a-2457T chromosome I [2458750-2476499]           | 0 | 1 | 0 | 1 |
| NC_004741:2 Shigella flexneri 2a-2457T chromosome I [371100-378499]              | 0 | 1 | 0 | 1 |
| NC_004741:23 Shigella flexneri 2a-2457T chromosome I [3069050-3077249]           | 0 | 0 | 0 | 0 |
| NC_004741:25 Shigella flexneri 2a-2457T chromosome I [3245600-3252149]           | 0 | 0 | 0 | 0 |
| NC_004741:26 Shigella flexneri 2a-2457T chromosome I [3854550-3862049]           | 0 | 0 | 0 | 0 |
| NC_004741:30 Shigella flexneri 2a-2457T chromosome I [3960900-3968949]           | 0 | 0 | 0 | 0 |
| NC_004741:31 Shigella flexneri 2a-2457T chromosome I [3998650-4007949]           | 0 | 1 | 0 | 1 |
| NC_004741:32 Shigella flexneri 2a-2457T chromosome I [4135000-4145199]           | 0 | 1 | 1 | 1 |
| NC_004741:33 Shigella flexneri 2a-2457T chromosome I [4160550-4177499]           | 0 | 1 | 0 | 1 |
| NC_004741:34 Shigella flexneri 2a-2457T chromosome I [4368600-4380049]           | 0 | 1 | 0 | 1 |
| NC_004741:6 Shigella flexneri 2a-2457T chromosome I [1079000-1085349]            | 0 | 0 | 0 | 0 |
| NC_004741:7 Shigella flexneri 2a-2457T chromosome I [1198750-1205699]            | 0 | 0 | 0 | 0 |
| NC_004757:11 Nitrosomonas europaea ATCC19718 chromosome I [2457200-2464849]      | 0 | 0 | 0 | 0 |
| NC_004757:7 Nitrosomonas europaea ATCC19718 chromosome I [1094100-1105699]       | 0 | 0 | 0 | 0 |
| NC_004829:1 Mycoplasma gallisepticum R chromosome I [365950-368999]              | 0 | 0 | 0 | 0 |
| NC_005027:1 Rhodopirellula baltica SH-1 chromosome I [653600-657049]             | 0 | 0 | 0 | 0 |
| NC_005027:13 Rhodopirellula baltica SH-1 chromosome I [2823750-2837449]          | 0 | 0 | 0 | 0 |
| NC_005027:19 Rhodopirellula baltica SH-1 chromosome I [4649450-4653699]          | 0 | 0 | 0 | 0 |
| NC_005027:20 Rhodopirellula baltica SH-1 chromosome I [4933700-4941649]          | 0 | 0 | 0 | 0 |
| NC_005027:21 Rhodopirellula baltica SH-1 chromosome I [5330650-5338299]          | 0 | 1 | 1 | 1 |
| NC_005027:24 Rhodopirellula baltica SH-1 chromosome I [5833500-5844799]          | 0 | 0 | 0 | 0 |
| NC_005027:25 Rhodopirellula baltica SH-1 chromosome I [6083900-6087649]          | 0 | 0 | 0 | 0 |
| NC_005027:3 Rhodopirellula baltica SH-1 chromosome I [1299400-1318849]           | 0 | 1 | 1 | 1 |
| NC_005027:8 Rhodopirellula baltica SH-1 chromosome I [2104050-2116349]           | 0 | 1 | 1 | 1 |
| NC_005027:9 Rhodopirellula baltica SH-1 chromosome I [2181500-2191499]           | 0 | 0 | 0 | 0 |
| NC_005071:1 Prochlorococcus marinus MIT9313 chromosome I [91800-98599]           | 0 | 1 | 0 | 1 |
| NC_005071:10 Prochlorococcus marinus MIT9313 chromosome I [528950-536549]        | 0 | 0 | 0 | 0 |
| NC_005071:11 Prochlorococcus marinus MIT9313 chromosome I [540550-549549]        | 0 | 0 | 0 | 0 |
| NC_005071:12 Prochlorococcus marinus MIT9313 chromosome I [678350-687399]        | 0 | 0 | 0 | 0 |
| NC_005071:13 Prochlorococcus marinus MIT9313 chromosome I [709000-717749]        | 0 | 0 | 0 | 0 |
| NC_005071:14 Prochlorococcus marinus MIT9313 chromosome I [790450-803049]        | 0 | 1 | 0 | 1 |
| NC_005071:16 Prochlorococcus marinus MIT9313 chromosome I [870900-877649]        | 0 | 0 | 0 | 0 |
| NC_005071:17 Prochlorococcus marinus MIT9313 chromosome I [917450-939349]        | 0 | 0 | 0 | 0 |
| NC_005071:2 Prochlorococcus marinus MIT9313 chromosome I [97750-125249]          | 1 | 1 | 0 | 1 |
| NC_005071:20 Prochlorococcus marinus MIT9313 chromosome I [1115950-1125499]      | 0 | 0 | 0 | 0 |
| NC_005071:21 Prochlorococcus marinus MIT9313 chromosome I [1648450-1655749]      | 0 | 0 | 0 | 0 |
| NC_005071:22 Prochlorococcus marinus MIT9313 chromosome I [2183550-2191999]      | 0 | 0 | 0 | 0 |
| NC_005071:4 Prochlorococcus marinus MIT9313 chromosome I [177000-189199]         | 0 | 0 | 0 | 0 |
| NC_005071:6 Prochlorococcus marinus MIT9313 chromosome I [296150-303449]         | 0 | 0 | 0 | 0 |
| NC_005071:7 Prochlorococcus marinus MIT9313 chromosome I [314500-321549]         | 0 | 1 | 0 | 1 |
| NC_005071:8 Prochlorococcus marinus MIT9313 chromosome I [328500-338599]         | 0 | 1 | 0 | 1 |
| NC_005071:9 Prochlorococcus marinus MIT9313 chromosome I [340250-346399]         | 0 | 1 | 0 | 1 |
| NC_005085:2 Chromobacterium violaceum ATCC12472 chromosome I [1302150-1313149]   | 0 | 1 | 0 | 1 |
| NC_005085:5 Chromobacterium violaceum ATCC12472 chromosome I [4343850-4356999]   | 0 | 1 | 0 | 1 |
| NC_005126:1 Photorhabdus luminescens TTO1 chromosome I [1071500-1080149]         | 0 | 0 | 0 | 0 |
| NC_005126:2 Photorhabdus luminescens TTO1 chromosome I [2825800-2833049]         | 0 | 0 | 0 | 0 |
| NC_005126:3 Photorhabdus luminescens TTO1 chromosome I [2909900-2914749]         | 0 | 0 | 0 | 0 |
| NC_005126:4 Photorhabdus luminescens TTO1 chromosome I [4453750-4461949]         | 0 | 0 | 0 | 0 |
| NC_005126:5 Photorhabdus luminescens TTO1 chromosome I [4710700-4717099]         | 0 | 0 | 0 | 0 |
| NC_005126:6 Photorhabdus luminescens TTO1 chromosome I [5591200-5596749]         | 0 | 0 | 0 | 0 |
| NC_005363:11 Bdellovibrio bacteriovorus HD100 chromosome I [2586650-2605799]     | 0 | 1 | 0 | 1 |
| NC_005363:14 Bdellovibrio bacteriovorus HD100 chromosome I [3566400-3583049]     | 0 | 1 | 0 | 1 |
| NC_005363:8 Bdellovibrio bacteriovorus HD100 chromosome I [1608100-1637849]      | 0 | 1 | 0 | 1 |
| NC_005773:27 Pseudomonas syringae 1448A chromosome I [4290750-4314699]           | 1 | 1 | 1 | 1 |
| NC_005773:30 Pseudomonas syringae 1448A chromosome I [4801350-4820399]           | 1 | 1 | 1 | 1 |
| NC_005773:34 Pseudomonas syringae 1448A chromosome I [5170400-5197999]           | 1 | 1 | 1 | 1 |
| NC_005877:1 Picrophilus torridus DSM9790 chromosome I [25300-35849]              | 0 | 0 | 0 | 0 |
| NC_005877:2 Picrophilus torridus DSM9790 chromosome I [49150-54099]              | 0 | 0 | 0 | 0 |
| NC_005877:3 Picrophilus torridus DSM9790 chromosome I [82900-94649]              | 0 | 0 | 0 | 0 |

|                                                                                      |   |   |   |   |
|--------------------------------------------------------------------------------------|---|---|---|---|
| NC_005877:4 Picrophilus torridus DSM9790 chromosome I [335700-348599]                | 0 | 0 | 0 | 0 |
| NC_005955:1 Bartonella quintana Toulouse chromosome I [782650-785749]                | 0 | 0 | 0 | 0 |
| NC_005956:1 Bartonella henselae Houston-1 chromosome I [1053450-1056699]             | 0 | 0 | 0 | 0 |
| NC_005966:1 Acinetobacter sp ADP1 chromosome I [66550-70549]                         | 0 | 0 | 0 | 0 |
| NC_005966:4 Acinetobacter sp ADP1 chromosome I [2094850-2102299]                     | 0 | 0 | 0 | 0 |
| NC_005966:5 Acinetobacter sp ADP1 chromosome I [2114000-2123199]                     | 0 | 1 | 0 | 1 |
| NC_005966:6 Acinetobacter sp ADP1 chromosome I [2657750-2668249]                     | 0 | 1 | 0 | 1 |
| NC_005966:8 Acinetobacter sp ADP1 chromosome I [2723000-2731749]                     | 0 | 0 | 1 | 1 |
| NC_006085:3 Propionibacterium acnes KPA171202 chromosome I [861000-869649]           | 0 | 0 | 0 | 0 |
| NC_006138:1 Desulfotalea psychrophila Lsv54 chromosome I [34500-40799]               | 0 | 0 | 0 | 0 |
| NC_006138:10 Desulfotalea psychrophila Lsv54 chromosome I [2320550-2328949]          | 0 | 1 | 0 | 1 |
| NC_006138:12 Desulfotalea psychrophila Lsv54 chromosome I [2633900-2642799]          | 0 | 0 | 0 | 0 |
| NC_006138:3 Desulfotalea psychrophila Lsv54 chromosome I [438500-443899]             | 0 | 0 | 1 | 1 |
| NC_006138:4 Desulfotalea psychrophila Lsv54 chromosome I [704000-710199]             | 0 | 0 | 0 | 0 |
| NC_006138:5 Desulfotalea psychrophila Lsv54 chromosome I [1205550-1215199]           | 0 | 0 | 0 | 0 |
| NC_006138:7 Desulfotalea psychrophila Lsv54 chromosome I [1577900-1585149]           | 0 | 0 | 0 | 0 |
| NC_006138:9 Desulfotalea psychrophila Lsv54 chromosome I [2291700-2301149]           | 0 | 1 | 0 | 1 |
| NC_006270:1 Bacillus licheniformis ATCC14580 chromosome I [207950-216899]            | 0 | 0 | 0 | 0 |
| NC_006270:12 Bacillus licheniformis ATCC14580 chromosome I [1965900-1971149]         | 0 | 0 | 0 | 0 |
| NC_006270:13 Bacillus licheniformis ATCC14580 chromosome I [1998400-2002399]         | 0 | 0 | 0 | 0 |
| NC_006270:14 Bacillus licheniformis ATCC14580 chromosome I [2172400-2178099]         | 0 | 0 | 0 | 0 |
| NC_006270:15 Bacillus licheniformis ATCC14580 chromosome I [2180300-2188149]         | 0 | 0 | 0 | 0 |
| NC_006270:16 Bacillus licheniformis ATCC14580 chromosome I [2595350-2604449]         | 0 | 0 | 0 | 0 |
| NC_006270:17 Bacillus licheniformis ATCC14580 chromosome I [2661550-2670799]         | 0 | 0 | 1 | 1 |
| NC_006270:18 Bacillus licheniformis ATCC14580 chromosome I [2677250-2689399]         | 0 | 0 | 0 | 0 |
| NC_006270:19 Bacillus licheniformis ATCC14580 chromosome I [2855400-2863599]         | 0 | 0 | 0 | 0 |
| NC_006270:2 Bacillus licheniformis ATCC14580 chromosome I [571100-585649]            | 0 | 0 | 0 | 0 |
| NC_006270:21 Bacillus licheniformis ATCC14580 chromosome I [3203100-3210449]         | 0 | 0 | 1 | 1 |
| NC_006270:22 Bacillus licheniformis ATCC14580 chromosome I [3420850-3431849]         | 0 | 0 | 1 | 1 |
| NC_006270:23 Bacillus licheniformis ATCC14580 chromosome I [3452150-3458249]         | 0 | 0 | 0 | 0 |
| NC_006270:24 Bacillus licheniformis ATCC14580 chromosome I [3460650-3467699]         | 0 | 0 | 1 | 1 |
| NC_006270:25 Bacillus licheniformis ATCC14580 chromosome I [3632250-3642299]         | 0 | 0 | 0 | 0 |
| NC_006270:28 Bacillus licheniformis ATCC14580 chromosome I [4153050-4175999]         | 0 | 0 | 0 | 0 |
| NC_006270:3 Bacillus licheniformis ATCC14580 chromosome I [721950-730299]            | 0 | 0 | 0 | 0 |
| NC_006270:4 Bacillus licheniformis ATCC14580 chromosome I [747550-758099]            | 0 | 1 | 0 | 1 |
| NC_006270:5 Bacillus licheniformis ATCC14580 chromosome I [926800-936549]            | 0 | 0 | 0 | 0 |
| NC_006270:6 Bacillus licheniformis ATCC14580 chromosome I [1120650-1141749]          | 0 | 0 | 0 | 0 |
| NC_006270:7 Bacillus licheniformis ATCC14580 chromosome I [1419800-1430349]          | 0 | 0 | 1 | 1 |
| NC_006270:8 Bacillus licheniformis ATCC14580 chromosome I [1456850-1462699]          | 0 | 0 | 0 | 0 |
| NC_006270:9 Bacillus licheniformis ATCC14580 chromosome I [1542000-1548799]          | 0 | 0 | 1 | 1 |
| NC_006300:1 Mannheimia succiniciproducens MBEL55E chromosome I [65250-73549]         | 0 | 1 | 0 | 1 |
| NC_006300:4 Mannheimia succiniciproducens MBEL55E chromosome I [485900-491099]       | 0 | 0 | 0 | 0 |
| NC_006300:5 Mannheimia succiniciproducens MBEL55E chromosome I [604400-618999]       | 0 | 0 | 0 | 0 |
| NC_006300:7 Mannheimia succiniciproducens MBEL55E chromosome I [1053600-1059999]     | 0 | 0 | 0 | 0 |
| NC_006300:8 Mannheimia succiniciproducens MBEL55E chromosome I [1145450-1154949]     | 0 | 0 | 0 | 0 |
| NC_006322:10 Bacillus licheniformis ATCC14580 (DSM13) chromosome I [1542900-1549649] | 0 | 0 | 1 | 1 |
| NC_006322:12 Bacillus licheniformis ATCC14580 (DSM13) chromosome I [1947250-1959549] | 0 | 1 | 0 | 1 |
| NC_006322:13 Bacillus licheniformis ATCC14580 (DSM13) chromosome I [1966750-1972349] | 0 | 0 | 0 | 0 |
| NC_006322:14 Bacillus licheniformis ATCC14580 (DSM13) chromosome I [2000400-2003249] | 0 | 0 | 0 | 0 |
| NC_006322:15 Bacillus licheniformis ATCC14580 (DSM13) chromosome I [2174100-2178399] | 0 | 0 | 0 | 0 |
| NC_006322:16 Bacillus licheniformis ATCC14580 (DSM13) chromosome I [2181400-2190649] | 0 | 0 | 0 | 0 |
| NC_006322:17 Bacillus licheniformis ATCC14580 (DSM13) chromosome I [2596200-2605549] | 0 | 0 | 0 | 0 |
| NC_006322:18 Bacillus licheniformis ATCC14580 (DSM13) chromosome I [2662950-2671699] | 0 | 0 | 1 | 1 |
| NC_006322:19 Bacillus licheniformis ATCC14580 (DSM13) chromosome I [2678300-2690249] | 0 | 0 | 0 | 0 |
| NC_006322:2 Bacillus licheniformis ATCC14580 (DSM13) chromosome I [570950-585349]    | 0 | 0 | 0 | 0 |
| NC_006322:20 Bacillus licheniformis ATCC14580 (DSM13) chromosome I [2855600-2863799] | 0 | 0 | 0 | 0 |
| NC_006322:22 Bacillus licheniformis ATCC14580 (DSM13) chromosome I [3203150-3210649] | 0 | 0 | 1 | 1 |
| NC_006322:23 Bacillus licheniformis ATCC14580 (DSM13) chromosome I [3421050-3431749] | 0 | 0 | 1 | 1 |
| NC_006322:25 Bacillus licheniformis ATCC14580 (DSM13) chromosome I [3452400-3458799] | 0 | 0 | 1 | 1 |
| NC_006322:26 Bacillus licheniformis ATCC14580 (DSM13) chromosome I [3460950-3467549] | 0 | 0 | 0 | 0 |
| NC_006322:27 Bacillus licheniformis ATCC14580 (DSM13) chromosome I [3632200-3642799] | 0 | 0 | 0 | 0 |
| NC_006322:30 Bacillus licheniformis ATCC14580 (DSM13) chromosome I [4153200-4177149] | 0 | 1 | 1 | 1 |
| NC_006322:4 Bacillus licheniformis ATCC14580 (DSM13) chromosome I [721700-730049]    | 0 | 0 | 0 | 0 |
| NC_006322:5 Bacillus licheniformis ATCC14580 (DSM13) chromosome I [747850-759449]    | 0 | 1 | 0 | 1 |
| NC_006322:6 Bacillus licheniformis ATCC14580 (DSM13) chromosome I [927800-937399]    | 0 | 0 | 1 | 1 |
| NC_006322:7 Bacillus licheniformis ATCC14580 (DSM13) chromosome I [1121500-1142599]  | 0 | 0 | 0 | 0 |
| NC_006322:8 Bacillus licheniformis ATCC14580 (DSM13) chromosome I [1419900-1430399]  | 0 | 0 | 0 | 0 |
| NC_006322:9 Bacillus licheniformis ATCC14580 (DSM13) chromosome I [1456750-1463549]  | 0 | 0 | 0 | 0 |
| NC_006347:1 Bacteroides fragilis YCH46 chromosome I [1317950-1328649]                | 0 | 0 | 0 | 0 |
| NC_006347:2 Bacteroides fragilis YCH46 chromosome I [1677950-1685399]                | 0 | 1 | 0 | 1 |
| NC_006347:4 Bacteroides fragilis YCH46 chromosome I [2954250-2964999]                | 1 | 0 | 1 | 1 |
| NC_006347:5 Bacteroides fragilis YCH46 chromosome I [4166100-4175699]                | 0 | 0 | 0 | 0 |
| NC_006370:1 Photobacterium profundum S59 chromosome I [245700-250199]                | 0 | 0 | 0 | 0 |
| NC_006370:2 Photobacterium profundum S59 chromosome I [1484800-1490549]              | 0 | 0 | 0 | 0 |
| NC_006370:3 Photobacterium profundum S59 chromosome I [1704900-1710849]              | 0 | 0 | 0 | 0 |
| NC_006370:5 Photobacterium profundum S59 chromosome I [2532100-2537899]              | 0 | 0 | 0 | 0 |
| NC_006370:6 Photobacterium profundum S59 chromosome I [3103750-3117849]              | 0 | 1 | 0 | 1 |
| NC_006370:7 Photobacterium profundum S59 chromosome I [3131650-3138599]              | 1 | 0 | 1 | 1 |
| NC_006394:1 Haloarcula marismortui ATCC 43049 plasmid pNG600 [1000-6849]             | 0 | 0 | 0 | 0 |
| NC_006396:9 Haloarcula marismortui ATCC 43049 chromosome I [2063350-2074899]         | 0 | 0 | 1 | 1 |
| NC_006510:11 Geobacillus kaustophilus HTA426 chromosome I [1403400-1419549]          | 0 | 1 | 0 | 1 |
| NC_006510:12 Geobacillus kaustophilus HTA426 chromosome I [1451750-1461999]          | 0 | 1 | 0 | 1 |
| NC_006510:13 Geobacillus kaustophilus HTA426 chromosome I [1505950-1519399]          | 0 | 1 | 0 | 1 |
| NC_006510:14 Geobacillus kaustophilus HTA426 chromosome I [1735800-1749399]          | 0 | 1 | 1 | 1 |
| NC_006510:15 Geobacillus kaustophilus HTA426 chromosome I [1905500-1911499]          | 0 | 0 | 0 | 0 |
| NC_006510:16 Geobacillus kaustophilus HTA426 chromosome I [1930600-1938199]          | 0 | 0 | 0 | 0 |
| NC_006510:17 Geobacillus kaustophilus HTA426 chromosome I [1946400-1954299]          | 0 | 0 | 0 | 0 |
| NC_006510:18 Geobacillus kaustophilus HTA426 chromosome I [2002700-2014449]          | 0 | 1 | 0 | 1 |
| NC_006510:19 Geobacillus kaustophilus HTA426 chromosome I [2048500-2066099]          | 0 | 1 | 1 | 1 |

|                                                                                                 |   |   |   |   |
|-------------------------------------------------------------------------------------------------|---|---|---|---|
| NC_006510:2 Geobacillus kaustophilus HTA426 chromosome I [314650-338999]                        | 0 | 1 | 1 | 1 |
| NC_006510:20 Geobacillus kaustophilus HTA426 chromosome I [2115500-2131949]                     | 0 | 1 | 1 | 1 |
| NC_006510:21 Geobacillus kaustophilus HTA426 chromosome I [2782700-2789799]                     | 0 | 1 | 0 | 1 |
| NC_006510:22 Geobacillus kaustophilus HTA426 chromosome I [2916550-2924599]                     | 1 | 1 | 0 | 1 |
| NC_006510:23 Geobacillus kaustophilus HTA426 chromosome I [2928150-2939249]                     | 0 | 1 | 0 | 1 |
| NC_006510:24 Geobacillus kaustophilus HTA426 chromosome I [3138500-3155699]                     | 0 | 1 | 1 | 1 |
| NC_006510:25 Geobacillus kaustophilus HTA426 chromosome I [3213750-3220899]                     | 0 | 0 | 0 | 0 |
| NC_006510:26 Geobacillus kaustophilus HTA426 chromosome I [3327000-3344949]                     | 0 | 1 | 0 | 1 |
| NC_006510:27 Geobacillus kaustophilus HTA426 chromosome I [3347900-3367099]                     | 0 | 1 | 0 | 1 |
| NC_006510:3 Geobacillus kaustophilus HTA426 chromosome I [376500-392049]                        | 0 | 0 | 0 | 0 |
| NC_006510:4 Geobacillus kaustophilus HTA426 chromosome I [535950-578449]                        | 1 | 1 | 1 | 1 |
| NC_006510:5 Geobacillus kaustophilus HTA426 chromosome I [594700-630099]                        | 1 | 1 | 1 | 1 |
| NC_006510:6 Geobacillus kaustophilus HTA426 chromosome I [751950-764549]                        | 0 | 1 | 0 | 1 |
| NC_006510:7 Geobacillus kaustophilus HTA426 chromosome I [889550-908299]                        | 0 | 1 | 1 | 1 |
| NC_006510:8 Geobacillus kaustophilus HTA426 chromosome I [912550-927499]                        | 0 | 1 | 1 | 1 |
| NC_006510:9 Geobacillus kaustophilus HTA426 chromosome I [1017550-1039749]                      | 0 | 1 | 0 | 1 |
| NC_006511:1 Salmonella enterica ATCC9150 chromosome I [31300-40949]                             | 0 | 0 | 0 | 0 |
| NC_006511:10 Salmonella enterica ATCC9150 chromosome I [1509200-1535549]                        | 0 | 1 | 0 | 1 |
| NC_006511:12 Salmonella enterica ATCC9150 chromosome I [1658650-1675199]                        | 0 | 1 | 0 | 1 |
| NC_006511:13 Salmonella enterica ATCC9150 chromosome I [1772950-1781949]                        | 0 | 1 | 0 | 1 |
| NC_006511:14 Salmonella enterica ATCC9150 chromosome I [1815950-1823349]                        | 0 | 0 | 0 | 0 |
| NC_006511:15 Salmonella enterica ATCC9150 chromosome I [2094050-2108099]                        | 0 | 1 | 0 | 1 |
| NC_006511:16 Salmonella enterica ATCC9150 chromosome I [2255250-2263249]                        | 0 | 1 | 0 | 1 |
| NC_006511:17 Salmonella enterica ATCC9150 chromosome I [2471800-2480549]                        | 0 | 1 | 1 | 1 |
| NC_006511:18 Salmonella enterica ATCC9150 chromosome I [2483550-2494299]                        | 0 | 1 | 0 | 1 |
| NC_006511:19 Salmonella enterica ATCC9150 chromosome I [2515150-2524799]                        | 0 | 1 | 0 | 1 |
| NC_006511:2 Salmonella enterica ATCC9150 chromosome I [533700-542099]                           | 0 | 0 | 0 | 0 |
| NC_006511:21 Salmonella enterica ATCC9150 chromosome I [2550500-2558849]                        | 0 | 1 | 0 | 1 |
| NC_006511:22 Salmonella enterica ATCC9150 chromosome I [2558250-2567099]                        | 0 | 1 | 0 | 1 |
| NC_006511:27 Salmonella enterica ATCC9150 chromosome I [2738050-2746799]                        | 0 | 0 | 0 | 0 |
| NC_006511:28 Salmonella enterica ATCC9150 chromosome I [2823900-2843499]                        | 0 | 1 | 0 | 1 |
| NC_006511:29 Salmonella enterica ATCC9150 chromosome I [2854200-2861649]                        | 0 | 0 | 0 | 0 |
| NC_006511:32 Salmonella enterica ATCC9150 chromosome I [3083350-3095899]                        | 0 | 1 | 0 | 1 |
| NC_006511:34 Salmonella enterica ATCC9150 chromosome I [3694300-3706049]                        | 0 | 1 | 0 | 1 |
| NC_006511:37 Salmonella enterica ATCC9150 chromosome I [4229100-4239849]                        | 0 | 1 | 0 | 1 |
| NC_006511:38 Salmonella enterica ATCC9150 chromosome I [4245500-4254599]                        | 0 | 0 | 0 | 0 |
| NC_006511:39 Salmonella enterica ATCC9150 chromosome I [4307300-4315399]                        | 0 | 1 | 0 | 1 |
| NC_006511:4 Salmonella enterica ATCC9150 chromosome I [796700-807949]                           | 0 | 1 | 0 | 1 |
| NC_006511:40 Salmonella enterica ATCC9150 chromosome I [4468950-4477999]                        | 0 | 0 | 0 | 1 |
| NC_006511:41 Salmonella enterica ATCC9150 chromosome I [4488500-4500699]                        | 0 | 0 | 1 | 1 |
| NC_006511:5 Salmonella enterica ATCC9150 chromosome I [858550-886299]                           | 0 | 1 | 0 | 1 |
| NC_006511:6 Salmonella enterica ATCC9150 chromosome I [1067750-1090049]                         | 0 | 1 | 0 | 1 |
| NC_006511:8 Salmonella enterica ATCC9150 chromosome I [1278350-1284799]                         | 0 | 1 | 0 | 1 |
| NC_006511:9 Salmonella enterica ATCC9150 chromosome I [1383550-1388399]                         | 0 | 1 | 0 | 1 |
| NC_006512:10 Idiomarina loihiensis L2TR chromosome I [2793000-2809599]                          | 0 | 1 | 0 | 1 |
| NC_006512:2 Idiomarina loihiensis L2TR chromosome I [568200-593949]                             | 0 | 1 | 0 | 1 |
| NC_006513:1 Azoarcus sp EbN1 chromosome I [4283050-4287149]                                     | 0 | 0 | 0 | 0 |
| NC_006526:4 Zymomonas mobilis ZM4 chromosome I [1979950-2009049]                                | 0 | 1 | 1 | 1 |
| NC_006582:11 Bacillus clausii KSM-K16 chromosome I [1143600-1157799]                            | 0 | 1 | 1 | 1 |
| NC_006582:12 Bacillus clausii KSM-K16 chromosome I [1302300-1309299]                            | 0 | 1 | 0 | 1 |
| NC_006582:13 Bacillus clausii KSM-K16 chromosome I [1449850-1458749]                            | 0 | 0 | 0 | 0 |
| NC_006582:14 Bacillus clausii KSM-K16 chromosome I [1474100-1484249]                            | 0 | 0 | 0 | 0 |
| NC_006582:17 Bacillus clausii KSM-K16 chromosome I [1532350-1540799]                            | 0 | 0 | 0 | 0 |
| NC_006582:18 Bacillus clausii KSM-K16 chromosome I [2208100-2217899]                            | 0 | 0 | 0 | 0 |
| NC_006582:19 Bacillus clausii KSM-K16 chromosome I [3277050-3283749]                            | 0 | 0 | 0 | 0 |
| NC_006582:2 Bacillus clausii KSM-K16 chromosome I [223550-233799]                               | 0 | 0 | 0 | 0 |
| NC_006582:20 Bacillus clausii KSM-K16 chromosome I [3839000-3853549]                            | 0 | 1 | 1 | 1 |
| NC_006582:21 Bacillus clausii KSM-K16 chromosome I [3952900-3963949]                            | 0 | 1 | 1 | 1 |
| NC_006582:22 Bacillus clausii KSM-K16 chromosome I [4260000-4272849]                            | 0 | 1 | 0 | 1 |
| NC_006582:3 Bacillus clausii KSM-K16 chromosome I [272750-279099]                               | 0 | 0 | 0 | 0 |
| NC_006582:6 Bacillus clausii KSM-K16 chromosome I [658550-666049]                               | 0 | 0 | 0 | 0 |
| NC_006582:7 Bacillus clausii KSM-K16 chromosome I [890900-914349]                               | 0 | 1 | 0 | 1 |
| NC_006582:8 Bacillus clausii KSM-K16 chromosome I [1016000-1031599]                             | 0 | 0 | 0 | 0 |
| NC_006814:1 Lactobacillus acidophilus NCFM chromosome I [1748450-1752549]                       | 0 | 0 | 0 | 0 |
| NC_006856:1 Salmonella enterica subsp. enterica serovar Choleraesuis str. virus [101000-110299] | 0 | 0 | 0 | 0 |
| NC_006905:13 Salmonella enterica SC-B67 chromosome I [1152450-1160549]                          | 0 | 0 | 0 | 0 |
| NC_006905:15 Salmonella enterica SC-B67 chromosome I [1347150-1368499]                          | 1 | 1 | 1 | 1 |
| NC_006905:16 Salmonella enterica SC-B67 chromosome I [1511150-1539999]                          | 0 | 1 | 0 | 1 |
| NC_006905:18 Salmonella enterica SC-B67 chromosome I [1729850-1742749]                          | 0 | 1 | 0 | 1 |
| NC_006905:19 Salmonella enterica SC-B67 chromosome I [1772150-1780249]                          | 0 | 1 | 0 | 1 |
| NC_006905:2 Salmonella enterica SC-B67 chromosome I [330300-340099]                             | 0 | 1 | 0 | 1 |
| NC_006905:20 Salmonella enterica SC-B67 chromosome I [1892800-1899749]                          | 0 | 0 | 0 | 0 |
| NC_006905:21 Salmonella enterica SC-B67 chromosome I [1964750-1988749]                          | 0 | 1 | 1 | 1 |
| NC_006905:23 Salmonella enterica SC-B67 chromosome I [2240400-2255349]                          | 0 | 1 | 1 | 1 |
| NC_006905:28 Salmonella enterica SC-B67 chromosome I [2878200-2885649]                          | 0 | 0 | 0 | 0 |
| NC_006905:29 Salmonella enterica SC-B67 chromosome I [2962700-2982449]                          | 0 | 1 | 0 | 1 |
| NC_006905:3 Salmonella enterica SC-B67 chromosome I [376750-396899]                             | 0 | 0 | 0 | 0 |
| NC_006905:30 Salmonella enterica SC-B67 chromosome I [2993450-3001349]                          | 0 | 0 | 0 | 0 |
| NC_006905:33 Salmonella enterica SC-B67 chromosome I [3849350-3860149]                          | 0 | 1 | 0 | 1 |
| NC_006905:35 Salmonella enterica SC-B67 chromosome I [4409750-4419349]                          | 0 | 1 | 0 | 1 |
| NC_006905:36 Salmonella enterica SC-B67 chromosome I [4428150-4437249]                          | 0 | 0 | 0 | 0 |
| NC_006905:37 Salmonella enterica SC-B67 chromosome I [4490950-4500149]                          | 0 | 1 | 1 | 1 |
| NC_006905:38 Salmonella enterica SC-B67 chromosome I [4642450-4668499]                          | 0 | 1 | 1 | 1 |
| NC_006905:5 Salmonella enterica SC-B67 chromosome I [425300-436099]                             | 0 | 1 | 0 | 1 |
| NC_006905:7 Salmonella enterica SC-B67 chromosome I [654500-667999]                             | 0 | 1 | 0 | 1 |
| NC_006905:9 Salmonella enterica SC-B67 chromosome I [949700-960499]                             | 0 | 1 | 1 | 1 |
| NC_006932:2 Brucella abortus biovar1 9-941 chromosome I [266900-280049]                         | 0 | 0 | 0 | 0 |
| NC_006932:3 Brucella abortus biovar1 9-941 chromosome I [287250-294899]                         | 0 | 1 | 0 | 1 |
| NC_006932:4 Brucella abortus biovar1 9-941 chromosome I [534700-557149]                         | 0 | 1 | 1 | 1 |



|                                                                                      |   |   |   |   |
|--------------------------------------------------------------------------------------|---|---|---|---|
| NC_006932:5 Brucella abortus biovar1 9-941 chromosome I [734700-741099]              | 0 | 0 | 0 | 0 |
| NC_006932:6 Brucella abortus biovar1 9-941 chromosome I [794150-801199]              | 0 | 1 | 0 | 1 |
| NC_006932:7 Brucella abortus biovar1 9-941 chromosome I [954400-960799]              | 0 | 0 | 1 | 1 |
| NC_006932:8 Brucella abortus biovar1 9-941 chromosome I [961400-971899]              | 0 | 1 | 0 | 1 |
| NC_006932:9 Brucella abortus biovar1 9-941 chromosome I [1064150-1071299]            | 0 | 1 | 0 | 1 |
| NC_006933:4 Brucella abortus biovar1 9-941 chromosome II [606000-613999]             | 0 | 0 | 0 | 0 |
| NC_006933:5 Brucella abortus biovar1 9-941 chromosome II [671900-680399]             | 0 | 0 | 0 | 0 |
| NC_006933:6 Brucella abortus biovar1 9-941 chromosome II [765900-770249]             | 0 | 0 | 0 | 0 |
| NC_006933:7 Brucella abortus biovar1 9-941 chromosome II [842600-851549]             | 0 | 0 | 0 | 0 |
| NC_007005:1 Pseudomonas syringae B728a chromosome I [103500-124349]                  | 1 | 1 | 0 | 1 |
| NC_007005:26 Pseudomonas syringae B728a chromosome I [4520500-4533649]               | 0 | 1 | 1 | 1 |
| NC_007204:1 Psychrobacter arcticus 273-4 chromosome I [758800-765599]                | 0 | 1 | 0 | 1 |
| NC_007204:3 Psychrobacter arcticus 273-4 chromosome I [1035050-1042449]              | 0 | 0 | 0 | 0 |
| NC_007204:5 Psychrobacter arcticus 273-4 chromosome I [1658000-1676249]              | 0 | 1 | 0 | 1 |
| NC_007298:4 Dechloromonas aromatica RCB chromosome I [781150-794499]                 | 0 | 1 | 0 | 1 |
| NC_007355:1 Methanosarcina barkeri Fusaro chromosome I [48750-54699]                 | 0 | 0 | 1 | 1 |
| NC_007355:2 Methanosarcina barkeri Fusaro chromosome I [1628400-1634399]             | 0 | 1 | 0 | 1 |
| NC_007355:3 Methanosarcina barkeri Fusaro chromosome I [3650850-3655999]             | 0 | 0 | 0 | 0 |
| NC_007356:1 Dehalococcoides sp CBDB1 chromosome I [57350-69799]                      | 0 | 1 | 0 | 1 |
| NC_007356:2 Dehalococcoides sp CBDB1 chromosome I [79950-86849]                      | 1 | 1 | 1 | 1 |
| NC_007356:4 Dehalococcoides sp CBDB1 chromosome I [209600-213549]                    | 0 | 0 | 0 | 0 |
| NC_007356:5 Dehalococcoides sp CBDB1 chromosome I [1170650-1181599]                  | 1 | 1 | 0 | 1 |
| NC_007356:6 Dehalococcoides sp CBDB1 chromosome I [1190300-1199799]                  | 0 | 0 | 1 | 1 |
| NC_007356:7 Dehalococcoides sp CBDB1 chromosome I [1224550-1235899]                  | 0 | 0 | 0 | 0 |
| NC_007356:8 Dehalococcoides sp CBDB1 chromosome I [1247000-1253949]                  | 1 | 0 | 0 | 1 |
| NC_007384:1 Shigella sonnei Ss046 chromosome I [19350-27999]                         | 0 | 1 | 0 | 1 |
| NC_007384:12 Shigella sonnei Ss046 chromosome I [1323900-1335999]                    | 0 | 0 | 1 | 1 |
| NC_007384:13 Shigella sonnei Ss046 chromosome I [1360050-1368749]                    | 0 | 1 | 1 | 1 |
| NC_007384:15 Shigella sonnei Ss046 chromosome I [1699650-1713449]                    | 0 | 1 | 1 | 1 |
| NC_007384:16 Shigella sonnei Ss046 chromosome I [1741850-1749899]                    | 0 | 0 | 0 | 0 |
| NC_007384:18 Shigella sonnei Ss046 chromosome I [2007200-2025999]                    | 0 | 1 | 1 | 1 |
| NC_007384:20 Shigella sonnei Ss046 chromosome I [2122550-2128549]                    | 0 | 1 | 0 | 1 |
| NC_007384:21 Shigella sonnei Ss046 chromosome I [2257400-2264799]                    | 0 | 1 | 1 | 1 |
| NC_007384:24 Shigella sonnei Ss046 chromosome I [2591700-2609249]                    | 0 | 1 | 0 | 1 |
| NC_007384:28 Shigella sonnei Ss046 chromosome I [3068000-3072349]                    | 0 | 0 | 0 | 0 |
| NC_007384:29 Shigella sonnei Ss046 chromosome I [3154100-3168049]                    | 0 | 1 | 1 | 1 |
| NC_007384:3 Shigella sonnei Ss046 chromosome I [250150-256599]                       | 0 | 1 | 1 | 1 |
| NC_007384:30 Shigella sonnei Ss046 chromosome I [3336950-3346599]                    | 0 | 0 | 0 | 0 |
| NC_007384:32 Shigella sonnei Ss046 chromosome I [3743650-3755499]                    | 0 | 1 | 1 | 1 |
| NC_007384:33 Shigella sonnei Ss046 chromosome I [3899850-3907299]                    | 0 | 0 | 0 | 0 |
| NC_007384:34 Shigella sonnei Ss046 chromosome I [3923750-3928299]                    | 0 | 0 | 0 | 0 |
| NC_007384:35 Shigella sonnei Ss046 chromosome I [3961300-3970049]                    | 0 | 1 | 0 | 1 |
| NC_007384:39 Shigella sonnei Ss046 chromosome I [4210900-4216849]                    | 0 | 0 | 0 | 0 |
| NC_007384:8 Shigella sonnei Ss046 chromosome I [1089550-1103349]                     | 0 | 0 | 0 | 0 |
| NC_007384:9 Shigella sonnei Ss046 chromosome I [1127600-1131649]                     | 0 | 1 | 0 | 1 |
| NC_007413:1 Anabaena variabilis ATCC29413 chromosome I [1263450-1266299]             | 0 | 0 | 0 | 0 |
| NC_007413:2 Anabaena variabilis ATCC29413 chromosome I [1590200-1594449]             | 0 | 0 | 0 | 0 |
| NC_007413:3 Anabaena variabilis ATCC29413 chromosome I [2972650-2975999]             | 0 | 0 | 0 | 0 |
| NC_007426:2 Natronomonas pharaonis DSM2160 chromosome I [1869050-1881799]            | 0 | 1 | 0 | 1 |
| NC_007426:3 Natronomonas pharaonis DSM2160 chromosome I [1892500-1900899]            | 0 | 1 | 0 | 1 |
| NC_007481:1 Pseudoalteromonas haloplanktis TAC125 chromosome I [1872350-1887199]     | 0 | 0 | 0 | 0 |
| NC_007498:13 Pelobacter carbinolicus DSM2380 chromosome I [1783000-1790649]          | 0 | 0 | 0 | 0 |
| NC_007498:14 Pelobacter carbinolicus DSM2380 chromosome I [1791300-1801349]          | 0 | 0 | 0 | 0 |
| NC_007498:17 Pelobacter carbinolicus DSM2380 chromosome I [2092800-2115349]          | 0 | 1 | 0 | 1 |
| NC_007498:18 Pelobacter carbinolicus DSM2380 chromosome I [2481600-2500249]          | 0 | 0 | 0 | 0 |
| NC_007503:1 Carboxydotherrmus hydrogenoformans Z-2901 chromosome I [862900-872049]   | 0 | 0 | 0 | 0 |
| NC_007503:2 Carboxydotherrmus hydrogenoformans Z-2901 chromosome I [924650-932249]   | 0 | 0 | 0 | 0 |
| NC_007503:3 Carboxydotherrmus hydrogenoformans Z-2901 chromosome I [1152850-1167199] | 0 | 0 | 0 | 0 |
| NC_007503:4 Carboxydotherrmus hydrogenoformans Z-2901 chromosome I [1168400-1174099] | 0 | 0 | 0 | 0 |
| NC_007503:5 Carboxydotherrmus hydrogenoformans Z-2901 chromosome I [1513850-1517149] | 0 | 0 | 0 | 0 |
| NC_007503:6 Carboxydotherrmus hydrogenoformans Z-2901 chromosome I [1537200-1542549] | 0 | 0 | 0 | 0 |
| NC_007503:7 Carboxydotherrmus hydrogenoformans Z-2901 chromosome I [1685400-1699049] | 0 | 0 | 0 | 0 |
| NC_007503:8 Carboxydotherrmus hydrogenoformans Z-2901 chromosome I [1938500-1942299] | 0 | 0 | 0 | 0 |
| NC_007503:9 Carboxydotherrmus hydrogenoformans Z-2901 chromosome I [2359100-2365849] | 0 | 0 | 0 | 0 |
| NC_007512:15 Pelodictyon luteolum DSM273 chromosome I [2036350-2085899]              | 0 | 1 | 1 | 1 |
| NC_007512:5 Pelodictyon luteolum DSM273 chromosome I [799900-807449]                 | 0 | 0 | 0 | 0 |
| NC_007512:6 Pelodictyon luteolum DSM273 chromosome I [871800-889549]                 | 0 | 0 | 0 | 0 |
| NC_007514:1 Chlorobium chlorochromatii CaD3 chromosome I [338500-347749]             | 0 | 0 | 0 | 0 |
| NC_007514:10 Chlorobium chlorochromatii CaD3 chromosome I [1314850-1322749]          | 0 | 0 | 0 | 0 |
| NC_007514:11 Chlorobium chlorochromatii CaD3 chromosome I [1481350-1488699]          | 0 | 0 | 0 | 0 |
| NC_007514:12 Chlorobium chlorochromatii CaD3 chromosome I [1823550-1829949]          | 0 | 0 | 0 | 0 |
| NC_007514:13 Chlorobium chlorochromatii CaD3 chromosome I [1849300-1855249]          | 0 | 0 | 0 | 0 |
| NC_007514:14 Chlorobium chlorochromatii CaD3 chromosome I [1859900-1865799]          | 0 | 0 | 0 | 0 |
| NC_007514:15 Chlorobium chlorochromatii CaD3 chromosome I [1937150-1950549]          | 0 | 0 | 0 | 0 |
| NC_007514:16 Chlorobium chlorochromatii CaD3 chromosome I [2100500-2106299]          | 0 | 0 | 0 | 0 |
| NC_007514:3 Chlorobium chlorochromatii CaD3 chromosome I [589300-592949]             | 0 | 0 | 0 | 0 |
| NC_007514:4 Chlorobium chlorochromatii CaD3 chromosome I [698000-703399]             | 0 | 0 | 0 | 0 |
| NC_007514:5 Chlorobium chlorochromatii CaD3 chromosome I [914300-950899]             | 0 | 0 | 0 | 0 |
| NC_007514:6 Chlorobium chlorochromatii CaD3 chromosome I [1050150-1057399]           | 0 | 0 | 0 | 0 |
| NC_007514:7 Chlorobium chlorochromatii CaD3 chromosome I [1066100-1071749]           | 0 | 0 | 0 | 0 |
| NC_007514:8 Chlorobium chlorochromatii CaD3 chromosome I [1241000-1246499]           | 0 | 0 | 0 | 0 |
| NC_007514:9 Chlorobium chlorochromatii CaD3 chromosome I [1282750-1287549]           | 0 | 0 | 0 | 0 |
| NC_007517:13 Geobacter metallireducens GS-15 chromosome I [2275450-2289649]          | 0 | 0 | 1 | 1 |
| NC_007517:16 Geobacter metallireducens GS-15 chromosome I [2525100-2551149]          | 0 | 0 | 1 | 1 |
| NC_007517:5 Geobacter metallireducens GS-15 chromosome I [1474150-1493599]           | 0 | 0 | 1 | 1 |
| NC_007517:7 Geobacter metallireducens GS-15 chromosome I [1683550-1696499]           | 0 | 0 | 0 | 0 |
| NC_007575:1 Thiomicrospira denitrificans ATCC 33889 chromosome I [154900-159749]     | 0 | 0 | 0 | 0 |
| NC_007576:1 Lactobacillus sakei subsp. sakei 23K chromosome I [137900-145149]        | 0 | 1 | 0 | 1 |
| NC_007576:2 Lactobacillus sakei subsp. sakei 23K chromosome I [574200-579899]        | 0 | 0 | 0 | 0 |

|                                                                                    |   |   |   |   |
|------------------------------------------------------------------------------------|---|---|---|---|
| NC_007576:3 Lactobacillus sakei subsp. sakei 23K chromosome I [1475050-1486549]    | 0 | 1 | 0 | 1 |
| NC_007576:4 Lactobacillus sakei subsp. sakei 23K chromosome I [1551050-1562449]    | 0 | 0 | 0 | 0 |
| NC_007576:5 Lactobacillus sakei subsp. sakei 23K chromosome I [1701900-1706949]    | 0 | 0 | 0 | 0 |
| NC_007606:1 Shigella dysenteriae Sd197 chromosome I [234500-240999]                | 0 | 0 | 0 | 0 |
| NC_007606:16 Shigella dysenteriae Sd197 chromosome I [1517350-1529249]             | 0 | 1 | 1 | 1 |
| NC_007606:17 Shigella dysenteriae Sd197 chromosome I [1603750-1611049]             | 0 | 0 | 0 | 0 |
| NC_007606:19 Shigella dysenteriae Sd197 chromosome I [2003850-2017049]             | 0 | 1 | 0 | 1 |
| NC_007606:24 Shigella dysenteriae Sd197 chromosome I [2353950-2372699]             | 0 | 1 | 1 | 1 |
| NC_007606:26 Shigella dysenteriae Sd197 chromosome I [3068200-3075249]             | 0 | 0 | 0 | 0 |
| NC_007606:31 Shigella dysenteriae Sd197 chromosome I [3787650-3797299]             | 0 | 1 | 0 | 1 |
| NC_007613:13 Shigella boydii Sb227 chromosome I [1536950-1551399]                  | 0 | 1 | 0 | 1 |
| NC_007613:18 Shigella boydii Sb227 chromosome I [2379400-2397449]                  | 0 | 1 | 0 | 1 |
| NC_007613:20 Shigella boydii Sb227 chromosome I [2703450-2710349]                  | 0 | 1 | 0 | 1 |
| NC_007613:21 Shigella boydii Sb227 chromosome I [2900750-2905549]                  | 0 | 0 | 0 | 0 |
| NC_007613:22 Shigella boydii Sb227 chromosome I [2985850-2992049]                  | 0 | 1 | 0 | 1 |
| NC_007613:23 Shigella boydii Sb227 chromosome I [3472400-3480399]                  | 0 | 0 | 0 | 0 |
| NC_007613:24 Shigella boydii Sb227 chromosome I [3494400-3504049]                  | 0 | 1 | 0 | 1 |
| NC_007613:25 Shigella boydii Sb227 chromosome I [3605000-3609849]                  | 0 | 0 | 0 | 0 |
| NC_007613:26 Shigella boydii Sb227 chromosome I [3640750-3651949]                  | 0 | 1 | 0 | 1 |
| NC_007613:28 Shigella boydii Sb227 chromosome I [4119350-4126099]                  | 0 | 1 | 0 | 1 |
| NC_007613:32 Shigella boydii Sb227 chromosome I [4239000-4248249]                  | 0 | 0 | 0 | 0 |
| NC_007613:34 Shigella boydii Sb227 chromosome I [4407300-4419149]                  | 0 | 1 | 0 | 1 |
| NC_007613:7 Shigella boydii Sb227 chromosome I [1044600-1057549]                   | 0 | 1 | 0 | 1 |
| NC_007613:8 Shigella boydii Sb227 chromosome I [1165700-1172149]                   | 0 | 0 | 0 | 0 |
| NC_007618:2 Brucella melitensis biovar Abortus 2308 chromosome I [263350-276399]   | 0 | 0 | 0 | 0 |
| NC_007618:3 Brucella melitensis biovar Abortus 2308 chromosome I [283550-290899]   | 0 | 1 | 0 | 1 |
| NC_007618:4 Brucella melitensis biovar Abortus 2308 chromosome I [531600-553449]   | 0 | 1 | 1 | 1 |
| NC_007618:5 Brucella melitensis biovar Abortus 2308 chromosome I [728750-738799]   | 0 | 1 | 0 | 1 |
| NC_007618:6 Brucella melitensis biovar Abortus 2308 chromosome I [789500-797449]   | 0 | 0 | 0 | 0 |
| NC_007618:7 Brucella melitensis biovar Abortus 2308 chromosome I [951600-957499]   | 0 | 1 | 1 | 1 |
| NC_007618:8 Brucella melitensis biovar Abortus 2308 chromosome I [957200-968799]   | 0 | 0 | 0 | 0 |
| NC_007618:9 Brucella melitensis biovar Abortus 2308 chromosome I [1061300-1069249] | 0 | 1 | 0 | 1 |
| NC_007624:1 Brucella melitensis biovar Abortus 2308 chromosome II [128000-133099]  | 0 | 0 | 0 | 0 |
| NC_007624:4 Brucella melitensis biovar Abortus 2308 chromosome II [606350-613399]  | 0 | 0 | 0 | 0 |
| NC_007624:5 Brucella melitensis biovar Abortus 2308 chromosome II [672200-680349]  | 0 | 0 | 1 | 1 |
| NC_007624:7 Brucella melitensis biovar Abortus 2308 chromosome II [843750-852249]  | 0 | 0 | 0 | 0 |
| NC_007644:1 Moorella thermoacetica ATCC 39073 chromosome I [10050-15699]           | 0 | 0 | 0 | 0 |
| NC_007644:10 Moorella thermoacetica ATCC 39073 chromosome I [651200-659549]        | 0 | 0 | 0 | 0 |
| NC_007644:11 Moorella thermoacetica ATCC 39073 chromosome I [690050-706799]        | 0 | 0 | 0 | 0 |
| NC_007644:13 Moorella thermoacetica ATCC 39073 chromosome I [785650-795899]        | 0 | 0 | 0 | 0 |
| NC_007644:15 Moorella thermoacetica ATCC 39073 chromosome I [1610950-1617499]      | 0 | 0 | 0 | 0 |
| NC_007644:16 Moorella thermoacetica ATCC 39073 chromosome I [1643250-1659349]      | 0 | 0 | 1 | 1 |
| NC_007644:17 Moorella thermoacetica ATCC 39073 chromosome I [1697100-1707799]      | 0 | 0 | 0 | 0 |
| NC_007644:2 Moorella thermoacetica ATCC 39073 chromosome I [166250-180299]         | 0 | 0 | 0 | 0 |
| NC_007644:20 Moorella thermoacetica ATCC 39073 chromosome I [2211400-2222749]      | 0 | 0 | 0 | 0 |
| NC_007644:22 Moorella thermoacetica ATCC 39073 chromosome I [2461050-2471349]      | 0 | 0 | 1 | 1 |
| NC_007644:3 Moorella thermoacetica ATCC 39073 chromosome I [284450-306899]         | 0 | 0 | 1 | 1 |
| NC_007644:4 Moorella thermoacetica ATCC 39073 chromosome I [317100-331099]         | 0 | 0 | 0 | 0 |
| NC_007644:5 Moorella thermoacetica ATCC 39073 chromosome I [365800-374199]         | 0 | 0 | 1 | 1 |
| NC_007644:6 Moorella thermoacetica ATCC 39073 chromosome I [374750-402249]         | 0 | 0 | 0 | 0 |
| NC_007644:7 Moorella thermoacetica ATCC 39073 chromosome I [421100-434849]         | 0 | 0 | 1 | 1 |
| NC_007644:8 Moorella thermoacetica ATCC 39073 chromosome I [474750-482099]         | 0 | 0 | 0 | 0 |
| NC_007644:9 Moorella thermoacetica ATCC 39073 chromosome I [634050-640999]         | 0 | 0 | 0 | 0 |
| NC_007645:16 Hahella chejuensis KCTC2396 chromosome I [2297650-2309249]            | 0 | 1 | 0 | 1 |
| NC_007645:18 Hahella chejuensis KCTC2396 chromosome I [2413400-2424199]            | 0 | 1 | 1 | 1 |
| NC_007645:19 Hahella chejuensis KCTC2396 chromosome I [2430200-2468149]            | 0 | 1 | 0 | 1 |
| NC_007645:2 Hahella chejuensis KCTC2396 chromosome I [609250-616399]               | 0 | 1 | 1 | 1 |
| NC_007645:21 Hahella chejuensis KCTC2396 chromosome I [2783450-2822399]            | 0 | 1 | 0 | 1 |
| NC_007645:4 Hahella chejuensis KCTC2396 chromosome I [1039050-1058649]             | 0 | 1 | 0 | 1 |
| NC_007645:48 Hahella chejuensis KCTC2396 chromosome I [5402150-5423649]            | 0 | 1 | 0 | 1 |
| NC_007645:60 Hahella chejuensis KCTC2396 chromosome I [6650400-6667399]            | 0 | 1 | 0 | 1 |
| NC_007712:11 Sodalis glossinidius morsitans chromosome I [1606000-1623399]         | 0 | 1 | 0 | 1 |
| NC_007712:15 Sodalis glossinidius morsitans chromosome I [1908700-1918799]         | 0 | 0 | 0 | 0 |
| NC_007712:16 Sodalis glossinidius morsitans chromosome I [1960200-1981549]         | 0 | 1 | 1 | 1 |
| NC_007712:19 Sodalis glossinidius morsitans chromosome I [2050800-2071899]         | 0 | 1 | 1 | 1 |
| NC_007712:23 Sodalis glossinidius morsitans chromosome I [2527850-2542799]         | 0 | 0 | 0 | 0 |
| NC_007712:30 Sodalis glossinidius morsitans chromosome I [3095550-3110649]         | 0 | 1 | 0 | 1 |
| NC_007712:32 Sodalis glossinidius morsitans chromosome I [3166000-3177349]         | 0 | 0 | 0 | 0 |
| NC_007712:37 Sodalis glossinidius morsitans chromosome I [3633250-3645849]         | 0 | 0 | 0 | 0 |
| NC_007712:38 Sodalis glossinidius morsitans chromosome I [3707150-3716649]         | 0 | 0 | 0 | 0 |
| NC_007712:6 Sodalis glossinidius morsitans chromosome I [1186850-1242349]          | 0 | 1 | 1 | 1 |
| NC_007712:7 Sodalis glossinidius morsitans chromosome I [1265100-1281999]          | 0 | 1 | 0 | 1 |
| NC_007712:9 Sodalis glossinidius morsitans chromosome I [1520400-1534949]          | 0 | 1 | 0 | 1 |
| NC_007761:3 Rhizobium etli CFN 42 chromosome I [803000-811799]                     | 0 | 1 | 0 | 1 |
| NC_007761:6 Rhizobium etli CFN 42 chromosome I [3949650-3957749]                   | 0 | 0 | 0 | 0 |
| NC_007775:2 Synechococcus sp. JA-3-3Ab chromosome I [1007450-1013049]              | 0 | 1 | 0 | 1 |
| NC_007776:10 Synechococcus sp. JA-2-3B'a(2-13) chromosome I [1801950-1811999]      | 0 | 0 | 0 | 0 |
| NC_007776:12 Synechococcus sp. JA-2-3B'a(2-13) chromosome I [2101550-2107549]      | 0 | 0 | 0 | 0 |
| NC_007776:13 Synechococcus sp. JA-2-3B'a(2-13) chromosome I [2151050-2157349]      | 0 | 0 | 0 | 0 |
| NC_007776:15 Synechococcus sp. JA-2-3B'a(2-13) chromosome I [2466600-2475099]      | 0 | 0 | 0 | 0 |
| NC_007776:16 Synechococcus sp. JA-2-3B'a(2-13) chromosome I [2637300-2642849]      | 0 | 0 | 0 | 0 |
| NC_007776:18 Synechococcus sp. JA-2-3B'a(2-13) chromosome I [2834150-2840949]      | 0 | 0 | 0 | 0 |
| NC_007776:2 Synechococcus sp. JA-2-3B'a(2-13) chromosome I [821800-827999]         | 0 | 0 | 0 | 0 |
| NC_007776:3 Synechococcus sp. JA-2-3B'a(2-13) chromosome I [866700-871249]         | 0 | 0 | 0 | 0 |
| NC_007776:5 Synechococcus sp. JA-2-3B'a(2-13) chromosome I [1296700-1302149]       | 0 | 0 | 0 | 0 |
| NC_007776:6 Synechococcus sp. JA-2-3B'a(2-13) chromosome I [1327350-1333999]       | 0 | 0 | 0 | 0 |
| NC_007776:8 Synechococcus sp. JA-2-3B'a(2-13) chromosome I [1404100-1408849]       | 0 | 0 | 0 | 0 |
| NC_007796:10 Methanospirillum hungatei JF-1 chromosome I [3355700-3366249]         | 0 | 1 | 0 | 1 |
| NC_007796:11 Methanospirillum hungatei JF-1 chromosome I [3389400-3397949]         | 0 | 0 | 1 | 1 |

|                                                                               |   |   |   |   |
|-------------------------------------------------------------------------------|---|---|---|---|
| NC_007796:12 Methanospirillum hungatei JF-1 chromosome I [3426950-3440399]    | 0 | 1 | 0 | 1 |
| NC_007796:2 Methanospirillum hungatei JF-1 chromosome I [423750-437049]       | 0 | 1 | 0 | 1 |
| NC_007796:4 Methanospirillum hungatei JF-1 chromosome I [1734800-1747999]     | 0 | 1 | 0 | 1 |
| NC_007796:5 Methanospirillum hungatei JF-1 chromosome I [2291850-2299249]     | 0 | 0 | 0 | 0 |
| NC_007796:6 Methanospirillum hungatei JF-1 chromosome I [2391500-2409249]     | 0 | 1 | 1 | 1 |
| NC_007796:7 Methanospirillum hungatei JF-1 chromosome I [2622250-2629299]     | 0 | 1 | 0 | 1 |
| NC_007796:8 Methanospirillum hungatei JF-1 chromosome I [2972100-2985399]     | 0 | 0 | 0 | 0 |
| NC_007796:9 Methanospirillum hungatei JF-1 chromosome I [3120900-3130149]     | 0 | 1 | 0 | 1 |
| NC_007802:1 Jannaschia sp. CCS1 chromosome I [1098800-1106299]                | 0 | 0 | 0 | 0 |
| NC_007802:2 Jannaschia sp. CCS1 chromosome I [1402000-1405799]                | 0 | 0 | 0 | 0 |
| NC_007907:12 Desulfitobacterium hafniense Y51 chromosome I [2327500-2337899]  | 0 | 1 | 0 | 1 |
| NC_007907:14 Desulfitobacterium hafniense Y51 chromosome I [2886100-2896299]  | 0 | 1 | 0 | 1 |
| NC_007907:15 Desulfitobacterium hafniense Y51 chromosome I [3000550-3019249]  | 0 | 1 | 0 | 1 |
| NC_007907:16 Desulfitobacterium hafniense Y51 chromosome I [3235150-3249299]  | 0 | 1 | 0 | 1 |
| NC_007907:17 Desulfitobacterium hafniense Y51 chromosome I [3477000-3483099]  | 0 | 0 | 0 | 0 |
| NC_007907:18 Desulfitobacterium hafniense Y51 chromosome I [3727750-3751699]  | 0 | 1 | 0 | 1 |
| NC_007907:19 Desulfitobacterium hafniense Y51 chromosome I [3878250-3887399]  | 0 | 1 | 0 | 1 |
| NC_007907:2 Desulfitobacterium hafniense Y51 chromosome I [769650-779849]     | 0 | 1 | 0 | 1 |
| NC_007907:20 Desulfitobacterium hafniense Y51 chromosome I [4505900-4512599]  | 0 | 0 | 0 | 0 |
| NC_007907:23 Desulfitobacterium hafniense Y51 chromosome I [4930950-4940349]  | 0 | 1 | 0 | 1 |
| NC_007907:25 Desulfitobacterium hafniense Y51 chromosome I [4961650-4980599]  | 0 | 1 | 0 | 1 |
| NC_007907:27 Desulfitobacterium hafniense Y51 chromosome I [5071350-5078849]  | 0 | 0 | 0 | 0 |
| NC_007907:29 Desulfitobacterium hafniense Y51 chromosome I [5108600-5149049]  | 0 | 1 | 1 | 1 |
| NC_007907:3 Desulfitobacterium hafniense Y51 chromosome I [816050-829449]     | 0 | 1 | 0 | 1 |
| NC_007907:30 Desulfitobacterium hafniense Y51 chromosome I [5191750-5208449]  | 0 | 1 | 0 | 1 |
| NC_007907:31 Desulfitobacterium hafniense Y51 chromosome I [5223250-5232199]  | 0 | 0 | 0 | 0 |
| NC_007907:32 Desulfitobacterium hafniense Y51 chromosome I [5237300-5250899]  | 0 | 0 | 0 | 0 |
| NC_007907:35 Desulfitobacterium hafniense Y51 chromosome I [5302550-5309149]  | 0 | 0 | 0 | 0 |
| NC_007907:36 Desulfitobacterium hafniense Y51 chromosome I [5436600-5448549]  | 0 | 0 | 1 | 1 |
| NC_007907:4 Desulfitobacterium hafniense Y51 chromosome I [832900-839549]     | 0 | 1 | 0 | 1 |
| NC_007907:6 Desulfitobacterium hafniense Y51 chromosome I [965100-986849]     | 0 | 1 | 1 | 1 |
| NC_007907:7 Desulfitobacterium hafniense Y51 chromosome I [985950-1027649]    | 0 | 1 | 1 | 1 |
| NC_007912:1 Saccharophagus degradans 2-40 chromosome I [178200-191349]        | 0 | 0 | 0 | 0 |
| NC_007912:5 Saccharophagus degradans 2-40 chromosome I [2706550-2721699]      | 0 | 0 | 0 | 0 |
| NC_007912:7 Saccharophagus degradans 2-40 chromosome I [3836100-3844199]      | 0 | 0 | 0 | 0 |
| NC_007912:9 Saccharophagus degradans 2-40 chromosome I [4402800-4406649]      | 0 | 0 | 0 | 0 |
| NC_007946:10 Escherichia coli UTI89 chromosome I [1121700-1131699]            | 0 | 1 | 0 | 1 |
| NC_007946:11 Escherichia coli UTI89 chromosome I [1245100-1252149]            | 0 | 1 | 0 | 1 |
| NC_007946:12 Escherichia coli UTI89 chromosome I [1252500-1259599]            | 0 | 0 | 0 | 0 |
| NC_007946:13 Escherichia coli UTI89 chromosome I [1283000-1299899]            | 0 | 1 | 0 | 1 |
| NC_007946:15 Escherichia coli UTI89 chromosome I [1527000-1532099]            | 0 | 0 | 0 | 0 |
| NC_007946:17 Escherichia coli UTI89 chromosome I [1634000-1664299]            | 0 | 1 | 0 | 1 |
| NC_007946:19 Escherichia coli UTI89 chromosome I [2032450-2037399]            | 0 | 0 | 0 | 0 |
| NC_007946:20 Escherichia coli UTI89 chromosome I [2058850-2067299]            | 0 | 0 | 0 | 0 |
| NC_007946:23 Escherichia coli UTI89 chromosome I [2169800-2185999]            | 0 | 1 | 0 | 1 |
| NC_007946:24 Escherichia coli UTI89 chromosome I [2235250-2249099]            | 0 | 1 | 0 | 1 |
| NC_007946:25 Escherichia coli UTI89 chromosome I [2302050-2310149]            | 0 | 1 | 0 | 1 |
| NC_007946:26 Escherichia coli UTI89 chromosome I [2326750-2332999]            | 0 | 1 | 0 | 1 |
| NC_007946:27 Escherichia coli UTI89 chromosome I [2595300-2606099]            | 0 | 1 | 1 | 1 |
| NC_007946:28 Escherichia coli UTI89 chromosome I [2640250-2655299]            | 0 | 1 | 0 | 1 |
| NC_007946:3 Escherichia coli UTI89 chromosome I [262900-271149]               | 0 | 1 | 0 | 1 |
| NC_007946:32 Escherichia coli UTI89 chromosome I [3131750-3137249]            | 0 | 0 | 0 | 0 |
| NC_007946:33 Escherichia coli UTI89 chromosome I [3294700-3305699]            | 0 | 1 | 0 | 1 |
| NC_007946:35 Escherichia coli UTI89 chromosome I [3815050-3825049]            | 0 | 1 | 0 | 1 |
| NC_007946:36 Escherichia coli UTI89 chromosome I [3858550-3864899]            | 0 | 1 | 0 | 1 |
| NC_007946:38 Escherichia coli UTI89 chromosome I [4054650-4061499]            | 0 | 1 | 0 | 1 |
| NC_007946:39 Escherichia coli UTI89 chromosome I [4408900-4414599]            | 0 | 1 | 0 | 1 |
| NC_007946:4 Escherichia coli UTI89 chromosome I [294250-314199]               | 0 | 1 | 1 | 1 |
| NC_007946:40 Escherichia coli UTI89 chromosome I [4781000-4792349]            | 0 | 1 | 0 | 1 |
| NC_007946:41 Escherichia coli UTI89 chromosome I [4793350-4808299]            | 1 | 1 | 0 | 1 |
| NC_007946:42 Escherichia coli UTI89 chromosome I [4814300-4841999]            | 0 | 1 | 0 | 1 |
| NC_007946:43 Escherichia coli UTI89 chromosome I [4882400-4889199]            | 0 | 0 | 0 | 0 |
| NC_007946:44 Escherichia coli UTI89 chromosome I [4893100-4909449]            | 0 | 1 | 1 | 1 |
| NC_007946:45 Escherichia coli UTI89 chromosome I [4933200-4937549]            | 0 | 0 | 0 | 0 |
| NC_007946:5 Escherichia coli UTI89 chromosome I [319450-326649]               | 0 | 1 | 0 | 1 |
| NC_007946:6 Escherichia coli UTI89 chromosome I [345700-349649]               | 0 | 0 | 0 | 0 |
| NC_007946:8 Escherichia coli UTI89 chromosome I [1074250-1088249]             | 0 | 1 | 1 | 1 |
| NC_007947:10 Methylobacillus flagellatus KT chromosome I [1342050-1356199]    | 0 | 1 | 0 | 1 |
| NC_007947:14 Methylobacillus flagellatus KT chromosome I [2142150-2171449]    | 0 | 0 | 0 | 1 |
| NC_007947:18 Methylobacillus flagellatus KT chromosome I [2451500-2481399]    | 0 | 0 | 0 | 0 |
| NC_007954:12 Shewanella denitrificans OS217 chromosome I [1828200-1833449]    | 0 | 0 | 1 | 1 |
| NC_007954:14 Shewanella denitrificans OS217 chromosome I [3177400-3199999]    | 0 | 1 | 0 | 1 |
| NC_007954:18 Shewanella denitrificans OS217 chromosome I [4288100-4298599]    | 0 | 1 | 1 | 1 |
| NC_007954:4 Shewanella denitrificans OS217 chromosome I [340850-352649]       | 0 | 1 | 1 | 1 |
| NC_007954:9 Shewanella denitrificans OS217 chromosome I [1498000-1506699]     | 0 | 0 | 0 | 0 |
| NC_007955:1 Methanococcoides burtonii DSM 6242 chromosome I [960100-962649]   | 0 | 0 | 0 | 0 |
| NC_007955:2 Methanococcoides burtonii DSM 6242 chromosome I [2127900-2131399] | 0 | 0 | 0 | 0 |
| NC_007955:3 Methanococcoides burtonii DSM 6242 chromosome I [751000-757199]   | 0 | 0 | 0 | 1 |
| NC_007958:1 Rhodopseudomonas palustris BisB5 [42100-44649]                    | 0 | 0 | 0 | 0 |
| NC_007969:1 Psychrobacter cryohalolentis K5 chromosome I [732400-742449]      | 0 | 1 | 0 | 1 |
| NC_007969:2 Psychrobacter cryohalolentis K5 chromosome I [1079750-1106399]    | 0 | 1 | 0 | 1 |
| NC_007969:4 Psychrobacter cryohalolentis K5 chromosome I [1654750-1659299]    | 0 | 1 | 0 | 1 |
| NC_008009:1 Acidobacteria bacterium Ellin345 chromosome I [447700-460649]     | 0 | 1 | 0 | 1 |
| NC_008009:10 Acidobacteria bacterium Ellin345 chromosome I [3153800-3157999]  | 0 | 0 | 0 | 0 |
| NC_008009:11 Acidobacteria bacterium Ellin345 chromosome I [3429700-3432799]  | 0 | 0 | 0 | 0 |
| NC_008009:18 Acidobacteria bacterium Ellin345 chromosome I [4914750-4920999]  | 0 | 0 | 0 | 0 |
| NC_008009:19 Acidobacteria bacterium Ellin345 chromosome I [4928700-4931849]  | 0 | 0 | 0 | 0 |
| NC_008009:3 Acidobacteria bacterium Ellin345 chromosome I [1271600-1288999]   | 0 | 1 | 0 | 1 |
| NC_008009:6 Acidobacteria bacterium Ellin345 chromosome I [2284900-2288799]   | 0 | 0 | 0 | 0 |

|                                                                                                    |   |   |   |   |
|----------------------------------------------------------------------------------------------------|---|---|---|---|
| NC_008009:7 Acidobacteria bacterium Ellin345 chromosome I [2437550-2445499]                        | 0 | 1 | 0 | 1 |
| NC_008009:8 Acidobacteria bacterium Ellin345 chromosome I [2447450-2455049]                        | 0 | 1 | 0 | 1 |
| NC_008009:9 Acidobacteria bacterium Ellin345 chromosome I [3141250-3148049]                        | 0 | 1 | 0 | 1 |
| NC_008021:5 Streptococcus pyogenes MGAS9429 chromosome I [559050-565949]                           | 0 | 0 | 0 | 0 |
| NC_008022:5 Streptococcus pyogenes MGAS10270 chromosome I [560600-566549]                          | 0 | 0 | 0 | 0 |
| NC_008027:3 Pseudomonas entomophila L48 chromosome I [1567100-1575249]                             | 0 | 1 | 0 | 1 |
| NC_008054:1 Lactobacillus delbrueckii subsp. bulgaricus ATCC 11842 chromosome I [211050-229149]    | 0 | 1 | 0 | 1 |
| NC_008054:10 Lactobacillus delbrueckii subsp. bulgaricus ATCC 11842 chromosome I [1505600-1517299] | 0 | 1 | 0 | 1 |
| NC_008054:11 Lactobacillus delbrueckii subsp. bulgaricus ATCC 11842 chromosome I [1623450-1633449] | 0 | 1 | 0 | 1 |
| NC_008054:12 Lactobacillus delbrueckii subsp. bulgaricus ATCC 11842 chromosome I [1652200-1677849] | 0 | 1 | 0 | 1 |
| NC_008054:16 Lactobacillus delbrueckii subsp. bulgaricus ATCC 11842 chromosome I [1849250-1854749] | 0 | 0 | 0 | 0 |
| NC_008054:2 Lactobacillus delbrueckii subsp. bulgaricus ATCC 11842 chromosome I [252650-259849]    | 0 | 0 | 0 | 0 |
| NC_008054:3 Lactobacillus delbrueckii subsp. bulgaricus ATCC 11842 chromosome I [275800-283499]    | 0 | 0 | 0 | 0 |
| NC_008054:5 Lactobacillus delbrueckii subsp. bulgaricus ATCC 11842 chromosome I [933250-949449]    | 0 | 1 | 0 | 1 |
| NC_008054:6 Lactobacillus delbrueckii subsp. bulgaricus ATCC 11842 chromosome I [1034000-1048499]  | 0 | 1 | 0 | 1 |
| NC_008054:7 Lactobacillus delbrueckii subsp. bulgaricus ATCC 11842 chromosome I [1121100-1130349]  | 0 | 0 | 0 | 0 |
| NC_008054:9 Lactobacillus delbrueckii subsp. bulgaricus ATCC 11842 chromosome I [1445700-1451099]  | 0 | 0 | 0 | 0 |
| NC_008228:1 Pseudoalteromonas atlantica T6c chromosome I [377750-383099]                           | 0 | 1 | 0 | 1 |
| NC_008228:11 Pseudoalteromonas atlantica T6c chromosome I [4918650-4922449]                        | 0 | 0 | 0 | 0 |
| NC_008228:2 Pseudoalteromonas atlantica T6c chromosome I [775350-778699]                           | 0 | 0 | 1 | 1 |
| NC_008228:4 Pseudoalteromonas atlantica T6c chromosome I [1073750-1078599]                         | 0 | 0 | 0 | 0 |
| NC_008228:8 Pseudoalteromonas atlantica T6c chromosome I [3684400-3691999]                         | 0 | 0 | 0 | 0 |
| NC_008228:9 Pseudoalteromonas atlantica T6c chromosome I [4313100-4318549]                         | 0 | 0 | 0 | 0 |
| NC_008253:10 Escherichia coli 536 chromosome I [1081700-1088699]                                   | 0 | 1 | 0 | 1 |
| NC_008253:11 Escherichia coli 536 chromosome I [1198450-1204649]                                   | 0 | 0 | 0 | 0 |
| NC_008253:12 Escherichia coli 536 chromosome I [1230300-1246599]                                   | 0 | 1 | 0 | 1 |
| NC_008253:13 Escherichia coli 536 chromosome I [1429150-1435349]                                   | 0 | 0 | 0 | 0 |
| NC_008253:14 Escherichia coli 536 chromosome I [1537450-1548999]                                   | 0 | 1 | 0 | 1 |
| NC_008253:15 Escherichia coli 536 chromosome I [1911650-1915549]                                   | 0 | 0 | 0 | 0 |
| NC_008253:16 Escherichia coli 536 chromosome I [1937600-1969549]                                   | 1 | 1 | 1 | 1 |
| NC_008253:19 Escherichia coli 536 chromosome I [2071900-2085849]                                   | 0 | 1 | 0 | 1 |
| NC_008253:20 Escherichia coli 536 chromosome I [2138500-2152299]                                   | 0 | 1 | 0 | 1 |
| NC_008253:21 Escherichia coli 536 chromosome I [2201550-2209899]                                   | 0 | 1 | 0 | 1 |
| NC_008253:22 Escherichia coli 536 chromosome I [2225550-2233299]                                   | 0 | 1 | 0 | 1 |
| NC_008253:23 Escherichia coli 536 chromosome I [2502450-2517099]                                   | 0 | 1 | 0 | 1 |
| NC_008253:24 Escherichia coli 536 chromosome I [2832650-2843199]                                   | 0 | 1 | 1 | 1 |
| NC_008253:26 Escherichia coli 536 chromosome I [2971300-2977049]                                   | 0 | 1 | 0 | 1 |
| NC_008253:27 Escherichia coli 536 chromosome I [3126050-3133699]                                   | 1 | 1 | 1 | 1 |
| NC_008253:3 Escherichia coli 536 chromosome I [261900-270399]                                      | 0 | 1 | 0 | 1 |
| NC_008253:31 Escherichia coli 536 chromosome I [3182850-3197099]                                   | 0 | 1 | 0 | 1 |
| NC_008253:32 Escherichia coli 536 chromosome I [3668600-3678749]                                   | 0 | 1 | 0 | 1 |
| NC_008253:33 Escherichia coli 536 chromosome I [3900600-3907549]                                   | 0 | 1 | 0 | 1 |
| NC_008253:34 Escherichia coli 536 chromosome I [3945300-3954349]                                   | 0 | 1 | 1 | 1 |
| NC_008253:35 Escherichia coli 536 chromosome I [3957750-3967799]                                   | 0 | 1 | 0 | 1 |
| NC_008253:37 Escherichia coli 536 chromosome I [3975100-3986749]                                   | 1 | 0 | 0 | 1 |
| NC_008253:38 Escherichia coli 536 chromosome I [3989250-4001449]                                   | 1 | 1 | 0 | 1 |
| NC_008253:4 Escherichia coli 536 chromosome I [300350-319349]                                      | 0 | 1 | 0 | 1 |
| NC_008253:40 Escherichia coli 536 chromosome I [4331000-4336999]                                   | 0 | 1 | 0 | 1 |
| NC_008253:41 Escherichia coli 536 chromosome I [4739800-4748749]                                   | 0 | 1 | 0 | 1 |
| NC_008253:42 Escherichia coli 536 chromosome I [4750300-4755699]                                   | 0 | 1 | 0 | 1 |
| NC_008253:43 Escherichia coli 536 chromosome I [4757000-4780599]                                   | 1 | 0 | 1 | 1 |
| NC_008253:44 Escherichia coli 536 chromosome I [4823350-4829699]                                   | 0 | 1 | 0 | 1 |
| NC_008253:45 Escherichia coli 536 chromosome I [4833600-4848749]                                   | 0 | 1 | 1 | 1 |
| NC_008253:6 Escherichia coli 536 chromosome I [340000-349899]                                      | 0 | 1 | 0 | 1 |
| NC_008253:7 Escherichia coli 536 chromosome I [357750-370899]                                      | 0 | 1 | 0 | 1 |
| NC_008253:8 Escherichia coli 536 chromosome I [376300-383349]                                      | 0 | 1 | 0 | 1 |
| NC_008253:9 Escherichia coli 536 chromosome I [402400-407049]                                      | 0 | 0 | 0 | 0 |
| NC_008255:1 Cytophaga hutchinsonii ATCC 33406 chromosome I [47700-61799]                           | 0 | 1 | 0 | 1 |
| NC_008255:2 Cytophaga hutchinsonii ATCC 33406 chromosome I [913750-920099]                         | 0 | 0 | 0 | 0 |
| NC_008255:3 Cytophaga hutchinsonii ATCC 33406 chromosome I [1349500-1362799]                       | 0 | 0 | 0 | 1 |
| NC_008255:4 Cytophaga hutchinsonii ATCC 33406 chromosome I [1719600-1729599]                       | 0 | 0 | 0 | 0 |
| NC_008255:5 Cytophaga hutchinsonii ATCC 33406 chromosome I [2848800-2855349]                       | 0 | 0 | 0 | 0 |
| NC_008255:6 Cytophaga hutchinsonii ATCC 33406 chromosome I [3304900-3311399]                       | 0 | 0 | 0 | 0 |
| NC_008255:7 Cytophaga hutchinsonii ATCC 33406 chromosome I [3365500-3396899]                       | 0 | 1 | 1 | 1 |
| NC_008258:1 Shigella flexneri 5 8401 chromosome I [271450-288149]                                  | 0 | 1 | 0 | 1 |
| NC_008258:14 Shigella flexneri 5 8401 chromosome I [1754600-1763649]                               | 0 | 1 | 0 | 1 |
| NC_008258:16 Shigella flexneri 5 8401 chromosome I [1937400-1951499]                               | 0 | 1 | 0 | 1 |
| NC_008258:17 Shigella flexneri 5 8401 chromosome I [2014050-2020199]                               | 0 | 0 | 0 | 0 |
| NC_008258:18 Shigella flexneri 5 8401 chromosome I [2042550-2055199]                               | 0 | 1 | 1 | 1 |
| NC_008258:2 Shigella flexneri 5 8401 chromosome I [406050-417099]                                  | 0 | 1 | 0 | 1 |
| NC_008258:21 Shigella flexneri 5 8401 chromosome I [2104900-2119949]                               | 0 | 1 | 0 | 1 |
| NC_008258:22 Shigella flexneri 5 8401 chromosome I [2192850-2200999]                               | 0 | 0 | 0 | 0 |
| NC_008258:23 Shigella flexneri 5 8401 chromosome I [2461750-2468399]                               | 0 | 0 | 1 | 1 |
| NC_008258:24 Shigella flexneri 5 8401 chromosome I [2474350-2492099]                               | 0 | 1 | 1 | 1 |
| NC_008258:28 Shigella flexneri 5 8401 chromosome I [3229500-3235999]                               | 0 | 1 | 0 | 1 |
| NC_008258:29 Shigella flexneri 5 8401 chromosome I [3553150-3571749]                               | 0 | 1 | 1 | 1 |
| NC_008258:30 Shigella flexneri 5 8401 chromosome I [3585700-3598349]                               | 0 | 1 | 1 | 1 |
| NC_008258:33 Shigella flexneri 5 8401 chromosome I [3964400-3972349]                               | 1 | 1 | 0 | 1 |
| NC_008258:34 Shigella flexneri 5 8401 chromosome I [4001200-4011099]                               | 0 | 1 | 0 | 1 |
| NC_008258:35 Shigella flexneri 5 8401 chromosome I [4348750-4358849]                               | 0 | 1 | 0 | 1 |
| NC_008258:9 Shigella flexneri 5 8401 chromosome I [1094400-1100299]                                | 0 | 0 | 0 | 0 |
| NC_008260:3 Alcanivorax borkumensis SK2 chromosome I [233450-248549]                               | 0 | 0 | 1 | 1 |
| NC_008260:9 Alcanivorax borkumensis SK2 chromosome I [1019550-1032049]                             | 0 | 1 | 0 | 1 |
| NC_008321:12 Shewanella sp. MR-4 chromosome I [1640500-1648499]                                    | 0 | 1 | 0 | 1 |
| NC_008321:17 Shewanella sp. MR-4 chromosome I [2041300-2046649]                                    | 1 | 0 | 0 | 1 |
| NC_008321:2 Shewanella sp. MR-4 chromosome I [462900-471299]                                       | 0 | 0 | 0 | 0 |
| NC_008321:24 Shewanella sp. MR-4 chromosome I [2652600-2660049]                                    | 0 | 1 | 0 | 1 |
| NC_008321:25 Shewanella sp. MR-4 chromosome I [2662500-2683199]                                    | 1 | 1 | 1 | 1 |
| NC_008321:33 Shewanella sp. MR-4 chromosome I [3818200-3845149]                                    | 1 | 1 | 1 | 1 |

|                                                                                                      |   |   |   |   |
|------------------------------------------------------------------------------------------------------|---|---|---|---|
| NC_008321:38 Shewanella sp. MR-4 chromosome I [4637250-4644449]                                      | 0 | 0 | 0 | 0 |
| NC_008321:9 Shewanella sp. MR-4 chromosome I [1530100-1540849]                                       | 0 | 1 | 0 | 1 |
| NC_008322:10 Shewanella sp. MR-7 chromosome I [1599100-1618399]                                      | 0 | 1 | 0 | 1 |
| NC_008322:12 Shewanella sp. MR-7 chromosome I [1712000-1720199]                                      | 0 | 1 | 0 | 1 |
| NC_008322:15 Shewanella sp. MR-7 chromosome I [2080050-2090549]                                      | 1 | 1 | 1 | 1 |
| NC_008322:17 Shewanella sp. MR-7 chromosome I [2111200-2122799]                                      | 0 | 1 | 0 | 1 |
| NC_008322:22 Shewanella sp. MR-7 chromosome I [2643800-2649199]                                      | 0 | 0 | 0 | 0 |
| NC_008322:23 Shewanella sp. MR-7 chromosome I [2719950-2727749]                                      | 0 | 1 | 0 | 1 |
| NC_008322:3 Shewanella sp. MR-7 chromosome I [645900-655049]                                         | 0 | 0 | 0 | 0 |
| NC_008322:31 Shewanella sp. MR-7 chromosome I [4013600-4024449]                                      | 0 | 1 | 0 | 1 |
| NC_008322:4 Shewanella sp. MR-7 chromosome I [726050-734299]                                         | 0 | 0 | 0 | 0 |
| NC_008322:8 Shewanella sp. MR-7 chromosome I [1190750-1206249]                                       | 1 | 1 | 0 | 1 |
| NC_008344:4 Nitrosomonas eutropha C91-C71 chromosome I [2097850-2103649]                             | 0 | 0 | 1 | 1 |
| NC_008344:6 Nitrosomonas eutropha C91-C71 chromosome I [2434100-2440699]                             | 0 | 0 | 0 | 0 |
| NC_008344:8 Nitrosomonas eutropha C91-C71 chromosome I [2470000-2480149]                             | 0 | 0 | 1 | 1 |
| NC_008344:9 Nitrosomonas eutropha C91-C71 chromosome I [2502850-2510349]                             | 0 | 0 | 0 | 0 |
| NC_008345:1 Shewanella frigidimarina NCIMB 400 chromosome I [1635950-1644199]                        | 0 | 1 | 0 | 1 |
| NC_008345:3 Shewanella frigidimarina NCIMB 400 chromosome I [2477150-2485449]                        | 0 | 0 | 0 | 0 |
| NC_008347:1 Maricaulis maris MCS10 chromosome I [942200-949349]                                      | 0 | 0 | 0 | 0 |
| NC_008358:1 Hyphomonas neptunium ATCC 15444 chromosome I [1240700-1245449]                           | 0 | 0 | 0 | 0 |
| NC_008380:2 Rhizobium leguminosarum bv. viciae 3841 chromosome I [862200-876249]                     | 0 | 1 | 0 | 1 |
| NC_008380:3 Rhizobium leguminosarum bv. viciae 3841 chromosome I [882800-895999]                     | 0 | 0 | 0 | 0 |
| NC_008497:2 Lactobacillus brevis ATCC 367 chromosome I [346500-352949]                               | 0 | 0 | 0 | 0 |
| NC_008497:3 Lactobacillus brevis ATCC 367 chromosome I [742150-746849]                               | 0 | 0 | 0 | 0 |
| NC_008497:6 Lactobacillus brevis ATCC 367 chromosome I [1579500-1589499]                             | 0 | 0 | 0 | 0 |
| NC_008497:7 Lactobacillus brevis ATCC 367 chromosome I [1828550-1835699]                             | 0 | 0 | 0 | 0 |
| NC_008497:9 Lactobacillus brevis ATCC 367 chromosome I [2041150-2047149]                             | 0 | 0 | 0 | 0 |
| NC_008508:1 Leptospira borgpetersenii serovar Hardjo-ovis L550 chromosome I [785400-792899]          | 0 | 0 | 0 | 0 |
| NC_008508:2 Leptospira borgpetersenii serovar Hardjo-ovis L550 chromosome I [1391450-1410299]        | 0 | 0 | 0 | 0 |
| NC_008508:3 Leptospira borgpetersenii serovar Hardjo-ovis L550 chromosome I [1417450-1422099]        | 0 | 0 | 0 | 0 |
| NC_008508:4 Leptospira borgpetersenii serovar Hardjo-ovis L550 chromosome I [2574500-2585349]        | 0 | 1 | 0 | 1 |
| NC_008510:1 Leptospira borgpetersenii serovar Hardjo-ovis JB197 chromosome I [1347300-1367249]       | 0 | 0 | 0 | 0 |
| NC_008510:2 Leptospira borgpetersenii serovar Hardjo-ovis JB197 chromosome I [1375300-1381299]       | 0 | 0 | 0 | 0 |
| NC_008510:3 Leptospira borgpetersenii serovar Hardjo-ovis JB197 chromosome I [2607750-2618599]       | 0 | 0 | 0 | 0 |
| NC_008510:4 Leptospira borgpetersenii serovar Hardjo-ovis JB197 chromosome I [2878250-2883399]       | 0 | 0 | 0 | 0 |
| NC_008525:1 Pediococcus pentosaceus ATCC 25745 chromosome I [623350-636199]                          | 0 | 0 | 0 | 0 |
| NC_008525:2 Pediococcus pentosaceus ATCC 25745 chromosome I [976750-981899]                          | 0 | 0 | 0 | 0 |
| NC_008526:1 Lactobacillus casei ATCC 334 chromosome I [77650-84549]                                  | 0 | 1 | 0 | 1 |
| NC_008526:2 Lactobacillus casei ATCC 334 chromosome I [95150-103949]                                 | 0 | 0 | 0 | 0 |
| NC_008526:3 Lactobacillus casei ATCC 334 chromosome I [501000-506949]                                | 0 | 1 | 0 | 1 |
| NC_008526:4 Lactobacillus casei ATCC 334 chromosome I [570700-586099]                                | 1 | 1 | 0 | 1 |
| NC_008526:5 Lactobacillus casei ATCC 334 chromosome I [1942450-1948799]                              | 0 | 0 | 0 | 0 |
| NC_008526:6 Lactobacillus casei ATCC 334 chromosome I [1975850-1989549]                              | 0 | 0 | 1 | 1 |
| NC_008526:7 Lactobacillus casei ATCC 334 chromosome I [2380350-2389999]                              | 0 | 0 | 1 | 1 |
| NC_008528:1 Oenococcus oeni PSU-1 chromosome I [57200-62199]                                         | 0 | 0 | 0 | 0 |
| NC_008528:2 Oenococcus oeni PSU-1 chromosome I [91250-95449]                                         | 0 | 0 | 0 | 0 |
| NC_008528:3 Oenococcus oeni PSU-1 chromosome I [665900-672549]                                       | 0 | 0 | 0 | 0 |
| NC_008528:4 Oenococcus oeni PSU-1 chromosome I [805750-808849]                                       | 0 | 0 | 0 | 0 |
| NC_008528:5 Oenococcus oeni PSU-1 chromosome I [1410950-1417049]                                     | 0 | 0 | 0 | 0 |
| NC_008529:1 Lactobacillus delbrueckii subsp. bulgaricus ATCC BAA-365 chromosome I [202750-221149]    | 0 | 1 | 0 | 1 |
| NC_008529:10 Lactobacillus delbrueckii subsp. bulgaricus ATCC BAA-365 chromosome I [1459100-1464099] | 0 | 0 | 0 | 0 |
| NC_008529:11 Lactobacillus delbrueckii subsp. bulgaricus ATCC BAA-365 chromosome I [1517550-1534399] | 0 | 1 | 1 | 1 |
| NC_008529:12 Lactobacillus delbrueckii subsp. bulgaricus ATCC BAA-365 chromosome I [1638700-1648149] | 0 | 1 | 0 | 1 |
| NC_008529:13 Lactobacillus delbrueckii subsp. bulgaricus ATCC BAA-365 chromosome I [1667000-1686649] | 0 | 1 | 1 | 1 |
| NC_008529:14 Lactobacillus delbrueckii subsp. bulgaricus ATCC BAA-365 chromosome I [1769650-1781999] | 0 | 1 | 0 | 1 |
| NC_008529:15 Lactobacillus delbrueckii subsp. bulgaricus ATCC BAA-365 chromosome I [1842150-1846249] | 0 | 0 | 0 | 0 |
| NC_008529:2 Lactobacillus delbrueckii subsp. bulgaricus ATCC BAA-365 chromosome I [245200-252799]    | 0 | 0 | 0 | 0 |
| NC_008529:4 Lactobacillus delbrueckii subsp. bulgaricus ATCC BAA-365 chromosome I [890600-903449]    | 0 | 1 | 0 | 1 |
| NC_008529:5 Lactobacillus delbrueckii subsp. bulgaricus ATCC BAA-365 chromosome I [920850-934999]    | 0 | 1 | 0 | 1 |
| NC_008529:8 Lactobacillus delbrueckii subsp. bulgaricus ATCC BAA-365 chromosome I [1045150-1067199]  | 0 | 1 | 0 | 1 |
| NC_008529:9 Lactobacillus delbrueckii subsp. bulgaricus ATCC BAA-365 chromosome I [1139050-1149749]  | 0 | 0 | 0 | 0 |
| NC_008531:1 Leuconostoc mesenteroides subsp. mesenteroides ATCC 8293 chromosome I [1419350-1428349]  | 0 | 0 | 0 | 0 |
| NC_008536:1 Solibacter usitatus Ellin6076 chromosome I [3611600-3621449]                             | 0 | 1 | 0 | 1 |
| NC_008536:2 Solibacter usitatus Ellin6076 chromosome I [4926300-493699]                              | 0 | 0 | 0 | 0 |
| NC_008555:1>Listeria welshimeri serovar 6b SLCC5334 chromosome I [1093100-1100449]                   | 0 | 0 | 0 | 0 |
| NC_008563:10 Escherichia coli APEC O1 chromosome I [1189900-1197149]                                 | 1 | 0 | 0 | 1 |
| NC_008563:11 Escherichia coli APEC O1 chromosome I [1221000-1236449]                                 | 0 | 1 | 0 | 1 |
| NC_008563:14 Escherichia coli APEC O1 chromosome I [1510150-1523449]                                 | 1 | 0 | 0 | 1 |
| NC_008563:16 Escherichia coli APEC O1 chromosome I [1622700-1644949]                                 | 0 | 1 | 0 | 1 |
| NC_008563:19 Escherichia coli APEC O1 chromosome I [2040100-2052549]                                 | 0 | 1 | 0 | 1 |
| NC_008563:21 Escherichia coli APEC O1 chromosome I [2136450-2142749]                                 | 1 | 0 | 0 | 1 |
| NC_008563:22 Escherichia coli APEC O1 chromosome I [2186150-2200449]                                 | 0 | 1 | 0 | 1 |
| NC_008563:23 Escherichia coli APEC O1 chromosome I [2250700-2257449]                                 | 0 | 1 | 0 | 1 |
| NC_008563:25 Escherichia coli APEC O1 chromosome I [2298500-2305749]                                 | 0 | 1 | 0 | 1 |
| NC_008563:26 Escherichia coli APEC O1 chromosome I [2567700-2580549]                                 | 1 | 0 | 0 | 1 |
| NC_008563:27 Escherichia coli APEC O1 chromosome I [2612800-2628349]                                 | 0 | 1 | 0 | 1 |
| NC_008563:32 Escherichia coli APEC O1 chromosome I [3148800-3154049]                                 | 0 | 1 | 0 | 1 |
| NC_008563:34 Escherichia coli APEC O1 chromosome I [3333900-3344349]                                 | 0 | 0 | 0 | 0 |
| NC_008563:35 Escherichia coli APEC O1 chromosome I [3342950-3350799]                                 | 0 | 1 | 0 | 1 |
| NC_008563:36 Escherichia coli APEC O1 chromosome I [3367550-3378649]                                 | 0 | 1 | 0 | 1 |
| NC_008563:38 Escherichia coli APEC O1 chromosome I [3847850-3858549]                                 | 0 | 1 | 0 | 1 |
| NC_008563:39 Escherichia coli APEC O1 chromosome I [3891000-3897699]                                 | 1 | 0 | 0 | 1 |
| NC_008563:41 Escherichia coli APEC O1 chromosome I [4087450-4094499]                                 | 0 | 1 | 0 | 1 |
| NC_008563:42 Escherichia coli APEC O1 chromosome I [4440950-4446599]                                 | 0 | 1 | 0 | 1 |
| NC_008563:45 Escherichia coli APEC O1 chromosome I [4747000-4755149]                                 | 1 | 1 | 0 | 1 |
| NC_008563:46 Escherichia coli APEC O1 chromosome I [4909600-4925449]                                 | 0 | 1 | 0 | 1 |
| NC_008563:47 Escherichia coli APEC O1 chromosome I [4949450-4954599]                                 | 0 | 0 | 0 | 0 |
| NC_008563:49 Escherichia coli APEC O1 chromosome I [5016800-5023449]                                 | 1 | 0 | 0 | 1 |
| NC_008563:5 Escherichia coli APEC O1 chromosome I [321050-328249]                                    | 0 | 1 | 1 | 1 |

|                                                                                              |   |   |   |   |
|----------------------------------------------------------------------------------------------|---|---|---|---|
| NC_008563:50 Escherichia coli APEC O1 chromosome I [5043600-5048749]                         | 0 | 1 | 0 | 1 |
| NC_008563:6 Escherichia coli APEC O1 chromosome I [347300-351249]                            | 0 | 0 | 0 | 0 |
| NC_008563:8 Escherichia coli APEC O1 chromosome I [1073200-1081249]                          | 0 | 1 | 0 | 1 |
| NC_008563:9 Escherichia coli APEC O1 chromosome I [1182500-1189549]                          | 0 | 1 | 0 | 1 |
| NC_008570:11 Aeromonas hydrophila subsp. hydrophila ATCC 7966 chromosome I [3225100-3265749] | 0 | 0 | 1 | 1 |
| NC_008577:11 Shewanella sp. ANA-3 chromosome I [1890550-1905799]                             | 0 | 0 | 0 | 0 |
| NC_008577:13 Shewanella sp. ANA-3 chromosome I [2117650-2124349]                             | 0 | 1 | 0 | 1 |
| NC_008577:16 Shewanella sp. ANA-3 chromosome I [2258100-2262499]                             | 0 | 0 | 0 | 0 |
| NC_008577:19 Shewanella sp. ANA-3 chromosome I [2429100-2445299]                             | 1 | 1 | 0 | 1 |
| NC_008577:20 Shewanella sp. ANA-3 chromosome I [2520600-2527149]                             | 0 | 1 | 0 | 1 |
| NC_008577:23 Shewanella sp. ANA-3 chromosome I [2913150-2920849]                             | 0 | 0 | 0 | 0 |
| NC_008577:27 Shewanella sp. ANA-3 chromosome I [3252750-3259499]                             | 0 | 0 | 0 | 0 |
| NC_008577:33 Shewanella sp. ANA-3 chromosome I [4613800-4628849]                             | 0 | 1 | 1 | 1 |
| NC_008577:34 Shewanella sp. ANA-3 chromosome I [4629350-4639999]                             | 0 | 1 | 0 | 1 |
| NC_008577:36 Shewanella sp. ANA-3 chromosome I [4913700-4920149]                             | 0 | 0 | 0 | 0 |
| NC_008577:7 Shewanella sp. ANA-3 chromosome I [1589000-1604599]                              | 0 | 1 | 0 | 1 |
| NC_008577:9 Shewanella sp. ANA-3 chromosome I [1696200-1704449]                              | 0 | 1 | 0 | 1 |
| NC_008578:1 Acidothermus cellulolyticus 11B chromosome I [888650-895049]                     | 0 | 0 | 0 | 0 |
| NC_008609:12 Pelobacter propionicus DSM2379 chromosome I [2000200-2059849]                   | 0 | 0 | 1 | 1 |
| NC_008609:16 Pelobacter propionicus DSM2379 chromosome I [2472550-2483549]                   | 0 | 0 | 1 | 1 |
| NC_008609:18 Pelobacter propionicus DSM2379 chromosome I [2645750-2663299]                   | 0 | 0 | 0 | 0 |
| NC_008609:28 Pelobacter propionicus DSM2379 chromosome I [3737150-3753999]                   | 0 | 0 | 0 | 0 |
| NC_008609:4 Pelobacter propionicus DSM2379 chromosome I [265700-276349]                      | 0 | 0 | 1 | 1 |
| NC_008611:1 Mycobacterium ulcerans Agy99 [2630750-2634199]                                   | 0 | 0 | 0 | 0 |
| NC_008618:5 Bifidobacterium adolescentis ATCC15703 chromosome I [1210900-1218199]            | 0 | 1 | 0 | 1 |
| NC_008618:8 Bifidobacterium adolescentis ATCC15703 chromosome I [1531000-1543149]            | 0 | 1 | 0 | 1 |
| NC_008639:1 Chlorobium phaeobacteroides DSM266 chromosome I [87600-93399]                    | 0 | 0 | 0 | 0 |
| NC_008639:10 Chlorobium phaeobacteroides DSM266 chromosome I [2566350-2583399]               | 0 | 0 | 0 | 0 |
| NC_008639:11 Chlorobium phaeobacteroides DSM266 chromosome I [2708000-2717349]               | 0 | 0 | 0 | 0 |
| NC_008639:13 Chlorobium phaeobacteroides DSM266 chromosome I [2998350-3012449]               | 0 | 0 | 1 | 1 |
| NC_008639:4 Chlorobium phaeobacteroides DSM266 chromosome I [1469250-1478849]                | 0 | 0 | 0 | 0 |
| NC_008639:5 Chlorobium phaeobacteroides DSM266 chromosome I [1577850-1586249]                | 0 | 0 | 0 | 0 |
| NC_008639:6 Chlorobium phaeobacteroides DSM266 chromosome I [2362600-2373699]                | 0 | 0 | 0 | 0 |
| NC_008639:8 Chlorobium phaeobacteroides DSM266 chromosome I [2467050-2473849]                | 0 | 0 | 0 | 0 |
| NC_008639:9 Chlorobium phaeobacteroides DSM266 chromosome I [2548600-2558049]                | 0 | 0 | 0 | 0 |
| NC_008700:18 Shewanella amazonensis SB2B chromosome I [2706350-2729099]                      | 0 | 1 | 0 | 1 |
| NC_008709:2 Psychromonas ingrahamii 37 chromosome I [1988500-1996099]                        | 0 | 1 | 0 | 1 |
| NC_008709:3 Psychromonas ingrahamii 37 chromosome I [2330950-2337199]                        | 0 | 0 | 0 | 0 |
| NC_008709:4 Psychromonas ingrahamii 37 chromosome I [3291650-3296599]                        | 0 | 0 | 0 | 0 |
| NC_008740:21 Marinobacter aquaeolei VT8 chromosome I [1830350-1856099]                       | 0 | 1 | 0 | 1 |
| NC_008740:27 Marinobacter aquaeolei VT8 chromosome I [2929500-2949149]                       | 0 | 1 | 0 | 1 |
| NC_008750:3 Shewanella sp. W3-18-1 chromosome I [386750-390899]                              | 0 | 1 | 0 | 1 |
| NC_008750:6 Shewanella sp. W3-18-1 chromosome I [4569550-4576099]                            | 0 | 1 | 1 | 1 |
| NC_008767:1 Neisseria meningitidis FAM18 chromosome I [24350-33849]                          | 0 | 0 | 0 | 0 |
| NC_008767:10 Neisseria meningitidis FAM18 chromosome I [616500-631849]                       | 0 | 0 | 0 | 0 |
| NC_008767:11 Neisseria meningitidis FAM18 chromosome I [809250-815949]                       | 0 | 0 | 0 | 0 |
| NC_008767:12 Neisseria meningitidis FAM18 chromosome I [881500-892499]                       | 0 | 0 | 1 | 1 |
| NC_008767:14 Neisseria meningitidis FAM18 chromosome I [1326000-1336099]                     | 0 | 1 | 1 | 1 |
| NC_008767:15 Neisseria meningitidis FAM18 chromosome I [1741200-1750499]                     | 0 | 0 | 0 | 0 |
| NC_008767:16 Neisseria meningitidis FAM18 chromosome I [1833350-1844199]                     | 0 | 0 | 0 | 0 |
| NC_008767:17 Neisseria meningitidis FAM18 chromosome I [1890600-1900149]                     | 0 | 0 | 0 | 0 |
| NC_008767:2 Neisseria meningitidis FAM18 chromosome I [56900-68249]                          | 0 | 0 | 0 | 0 |
| NC_008767:20 Neisseria meningitidis FAM18 chromosome I [2131700-2143099]                     | 0 | 0 | 0 | 0 |
| NC_008767:5 Neisseria meningitidis FAM18 chromosome I [277750-285349]                        | 0 | 0 | 1 | 1 |
| NC_008767:7 Neisseria meningitidis FAM18 chromosome I [456800-464099]                        | 0 | 0 | 0 | 0 |
| NC_008767:8 Neisseria meningitidis FAM18 chromosome I [463600-472049]                        | 0 | 0 | 0 | 0 |
| NC_008767:9 Neisseria meningitidis FAM18 chromosome I [550300-557299]                        | 0 | 1 | 1 | 1 |
| NC_008781:6 Polaromonas naphthalenivorans CJ2 chromosome I [4183300-4213449]                 | 0 | 0 | 1 | 1 |
| NC_008817:1 Prochlorococcus marinus MIT 9515 chromosome I [1229400-1234599]                  | 0 | 0 | 0 | 0 |
| NC_008819:1 Prochlorococcus marinus NATL1A chromosome I [795950-808449]                      | 0 | 1 | 0 | 1 |
| NC_008820:1 Prochlorococcus marinus MIT 9303 chromosome I [95500-145549]                     | 0 | 1 | 0 | 1 |
| NC_008820:10 Prochlorococcus marinus MIT 9303 chromosome I [1563000-1566449]                 | 0 | 0 | 0 | 0 |
| NC_008820:11 Prochlorococcus marinus MIT 9303 chromosome I [1664200-1676499]                 | 0 | 1 | 0 | 1 |
| NC_008820:12 Prochlorococcus marinus MIT 9303 chromosome I [1771500-1795699]                 | 0 | 1 | 0 | 1 |
| NC_008820:13 Prochlorococcus marinus MIT 9303 chromosome I [1823600-1836849]                 | 0 | 1 | 0 | 1 |
| NC_008820:16 Prochlorococcus marinus MIT 9303 chromosome I [2600150-2605899]                 | 0 | 0 | 0 | 0 |
| NC_008820:2 Prochlorococcus marinus MIT 9303 chromosome I [214150-223699]                    | 0 | 0 | 0 | 0 |
| NC_008820:5 Prochlorococcus marinus MIT 9303 chromosome I [1146100-1152949]                  | 0 | 0 | 0 | 0 |
| NC_008820:6 Prochlorococcus marinus MIT 9303 chromosome I [1157750-1165699]                  | 0 | 0 | 0 | 0 |
| NC_008820:7 Prochlorococcus marinus MIT 9303 chromosome I [1362500-1376249]                  | 0 | 1 | 0 | 1 |
| NC_009012:1 Clostridium thermocellum ATCC 27405 chromosome I [1321600-1327999]               | 0 | 1 | 0 | 1 |
| NC_009012:2 Clostridium thermocellum ATCC 27405 chromosome I [1342850-1350499]               | 0 | 0 | 0 | 0 |
| NC_009012:3 Clostridium thermocellum ATCC 27405 chromosome I [1374200-1381999]               | 0 | 0 | 1 | 1 |
| NC_009012:4 Clostridium thermocellum ATCC 27405 chromosome I [1644550-1650549]               | 0 | 0 | 0 | 0 |
| NC_009012:5 Clostridium thermocellum ATCC 27405 chromosome I [2016050-2039449]               | 0 | 0 | 0 | 0 |
| NC_009012:6 Clostridium thermocellum ATCC 27405 chromosome I [2051400-2067849]               | 0 | 0 | 0 | 0 |
| NC_009052:1 Shewanella baltica OS155 chromosome I [73300-79499]                              | 0 | 1 | 0 | 1 |
| NC_009052:11 Shewanella baltica OS155 chromosome I [2518150-2525549]                         | 1 | 1 | 0 | 1 |
| NC_009052:12 Shewanella baltica OS155 chromosome I [2702300-2705099]                         | 0 | 0 | 1 | 1 |
| NC_009052:19 Shewanella baltica OS155 chromosome I [3668250-3676599]                         | 0 | 1 | 1 | 1 |
| NC_009052:21 Shewanella baltica OS155 chromosome I [4174400-4182449]                         | 1 | 0 | 0 | 1 |
| NC_009052:22 Shewanella baltica OS155 chromosome I [4246000-4253399]                         | 0 | 0 | 0 | 0 |
| NC_009052:25 Shewanella baltica OS155 chromosome I [5092550-5101399]                         | 0 | 1 | 1 | 1 |
| NC_009052:6 Shewanella baltica OS155 chromosome I [1837150-1843549]                          | 0 | 1 | 0 | 1 |
| NC_009053:1 Actinobacillus pleuropneumoniae L20 chromosome I [906000-908899]                 | 0 | 0 | 1 | 1 |
| NC_009053:2 Actinobacillus pleuropneumoniae L20 chromosome I [1089900-1102999]               | 0 | 1 | 1 | 1 |
| NC_009053:3 Actinobacillus pleuropneumoniae L20 chromosome I [1673150-1683299]               | 0 | 0 | 0 | 0 |
| NC_009053:4 Actinobacillus pleuropneumoniae L20 chromosome I [1801450-1810699]               | 0 | 0 | 0 | 0 |
| NC_009092:44 Shewanella loihica PV-4 chromosome I [4546350-4568949]                          | 0 | 0 | 1 | 1 |

|                                                                          |              |               |               |               |
|--------------------------------------------------------------------------|--------------|---------------|---------------|---------------|
| NC_009138:13 Herminiimonas arsenicoxydans chromosome I [1521450-1533199] | 0            | 1             | 1             | 1             |
| NC_009138:15 Herminiimonas arsenicoxydans chromosome I [1549600-1566099] | 0            | 1             | 1             | 1             |
| NC_009138:16 Herminiimonas arsenicoxydans chromosome I [1579550-1599399] | 0            | 1             | 0             | 1             |
| NC_009138:17 Herminiimonas arsenicoxydans chromosome I [1844600-1865349] | 0            | 1             | 1             | 1             |
| NC_009138:18 Herminiimonas arsenicoxydans chromosome I [1872550-1882749] | 0            | 1             | 1             | 1             |
| NC_009138:23 Herminiimonas arsenicoxydans chromosome I [3158400-3187849] | 0            | 1             | 1             | 1             |
| NC_009138:4 Herminiimonas arsenicoxydans chromosome I [468700-489399]    | 0            | 1             | 0             | 1             |
| NC_009138:5 Herminiimonas arsenicoxydans chromosome I [494800-513899]    | 0            | 1             | 1             | 1             |
| NC_009142:1 Saccharopolyspora erythraea NRRL 2338 [2821750-2824099]      | 0            | 1             | 0             | 1             |
| NC_009142:2 Saccharopolyspora erythraea NRRL 2338 [6216700-6222149]      | 0            | 0             | 0             | 0             |
| <b>Percentage of confirmed predictions</b>                               | <b>3.83%</b> | <b>48.72%</b> | <b>16.45%</b> | <b>55.35%</b> |
